# Supplementary material
Source: ML conference proceedings conference paper supplement (https://openreview.net/forum?id=dvRysCqmYQ)

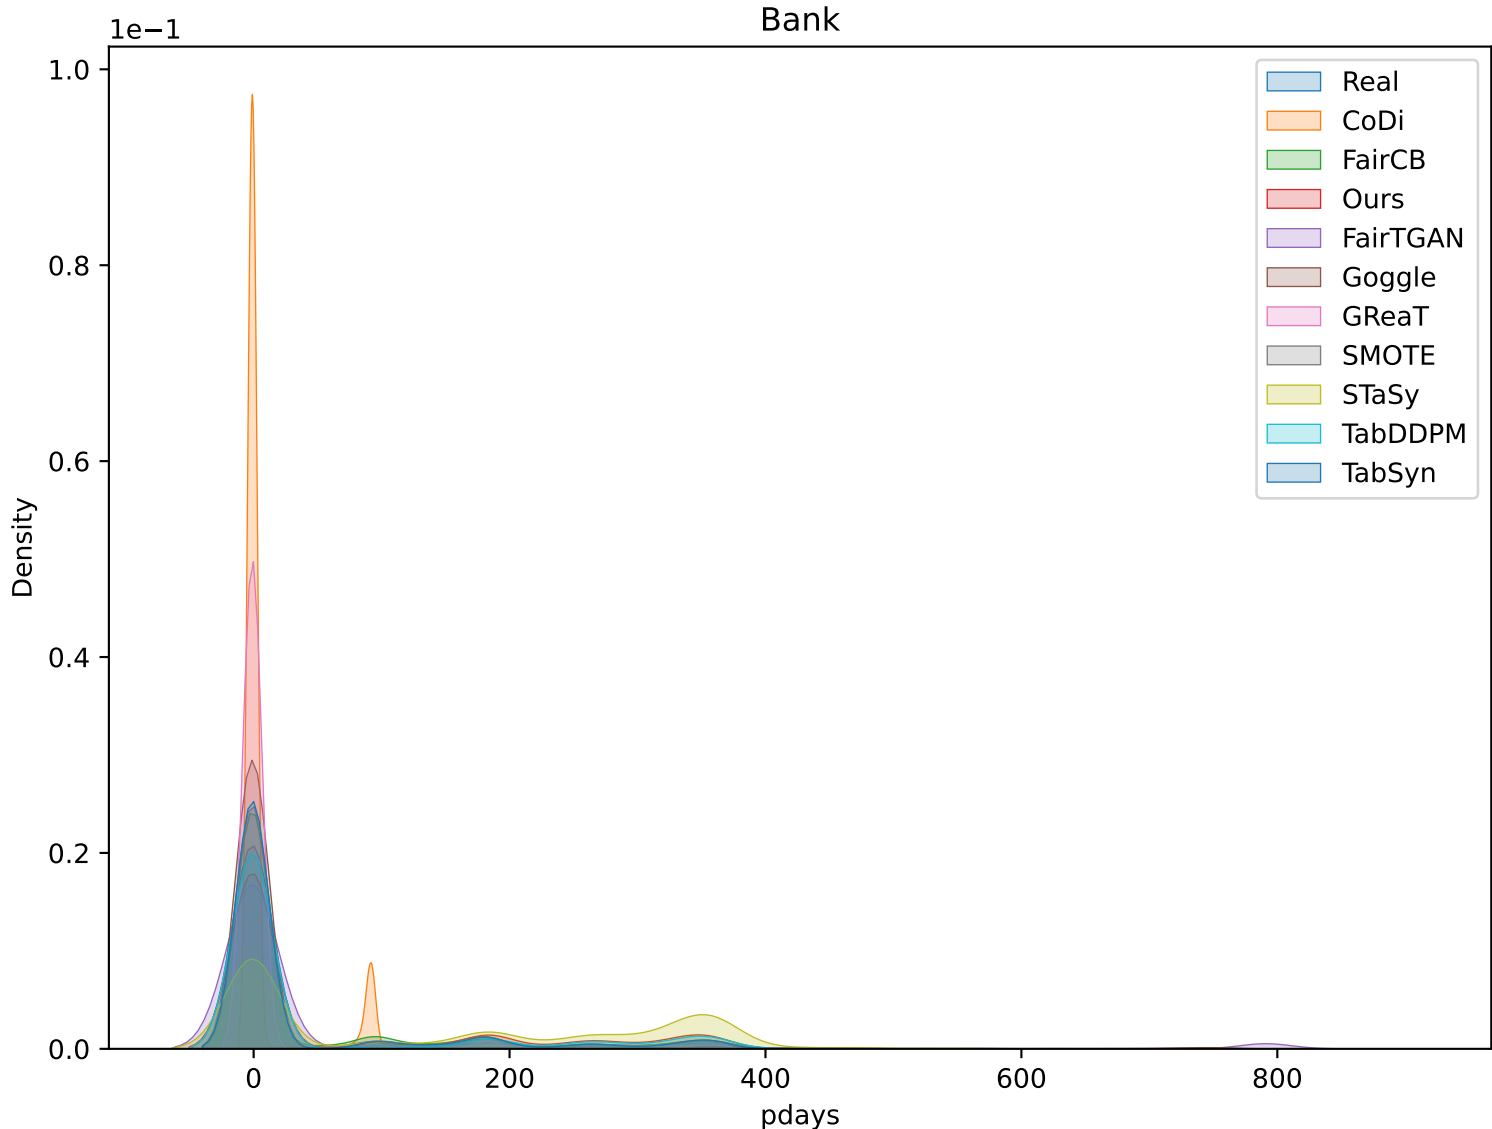

Supplement: supplementary_material [file attachment]

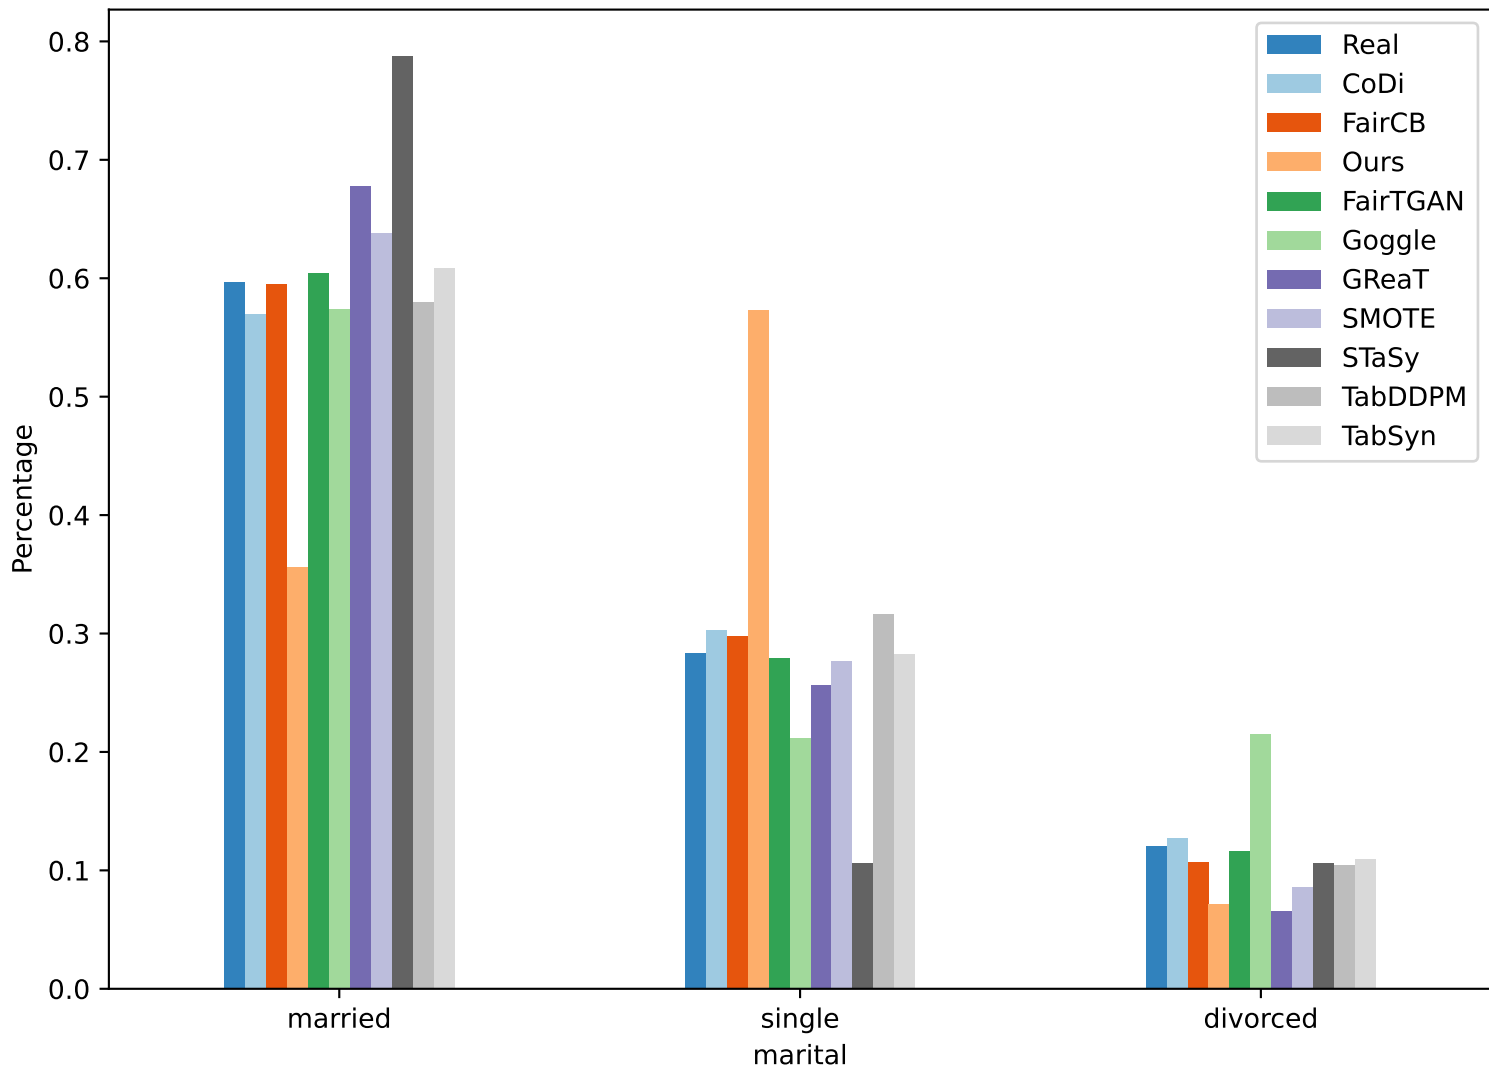

Supplement: supplementary_material [file attachment]

German

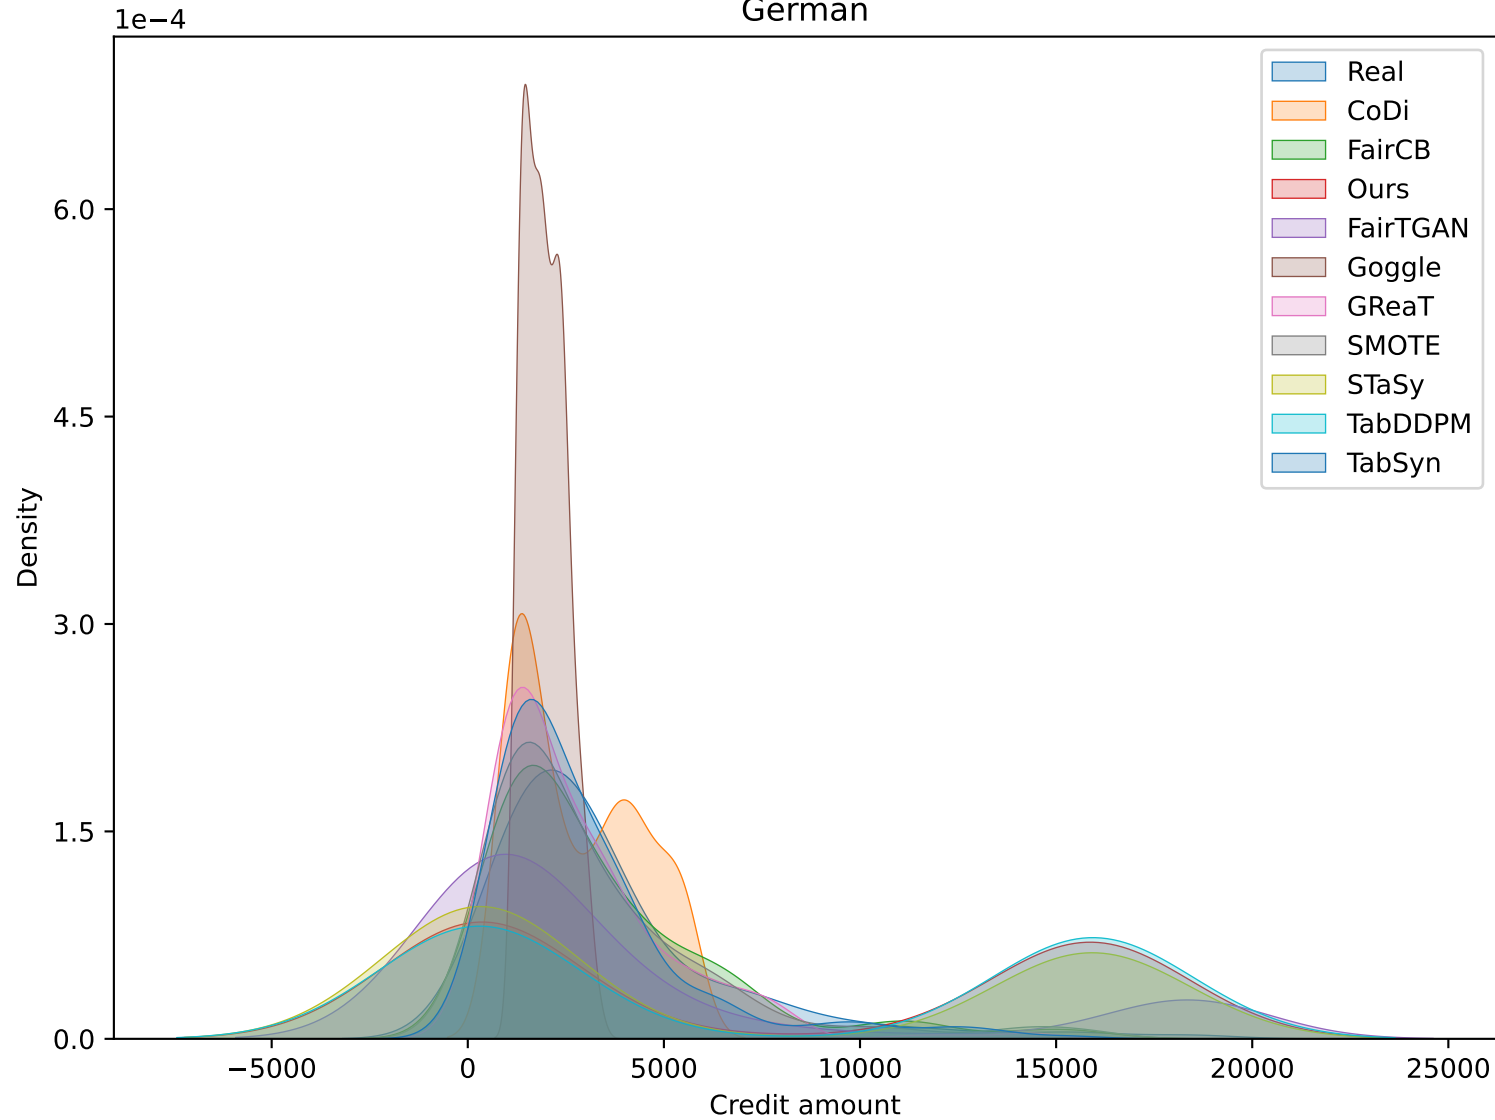

Supplement: supplementary_material [file attachment]

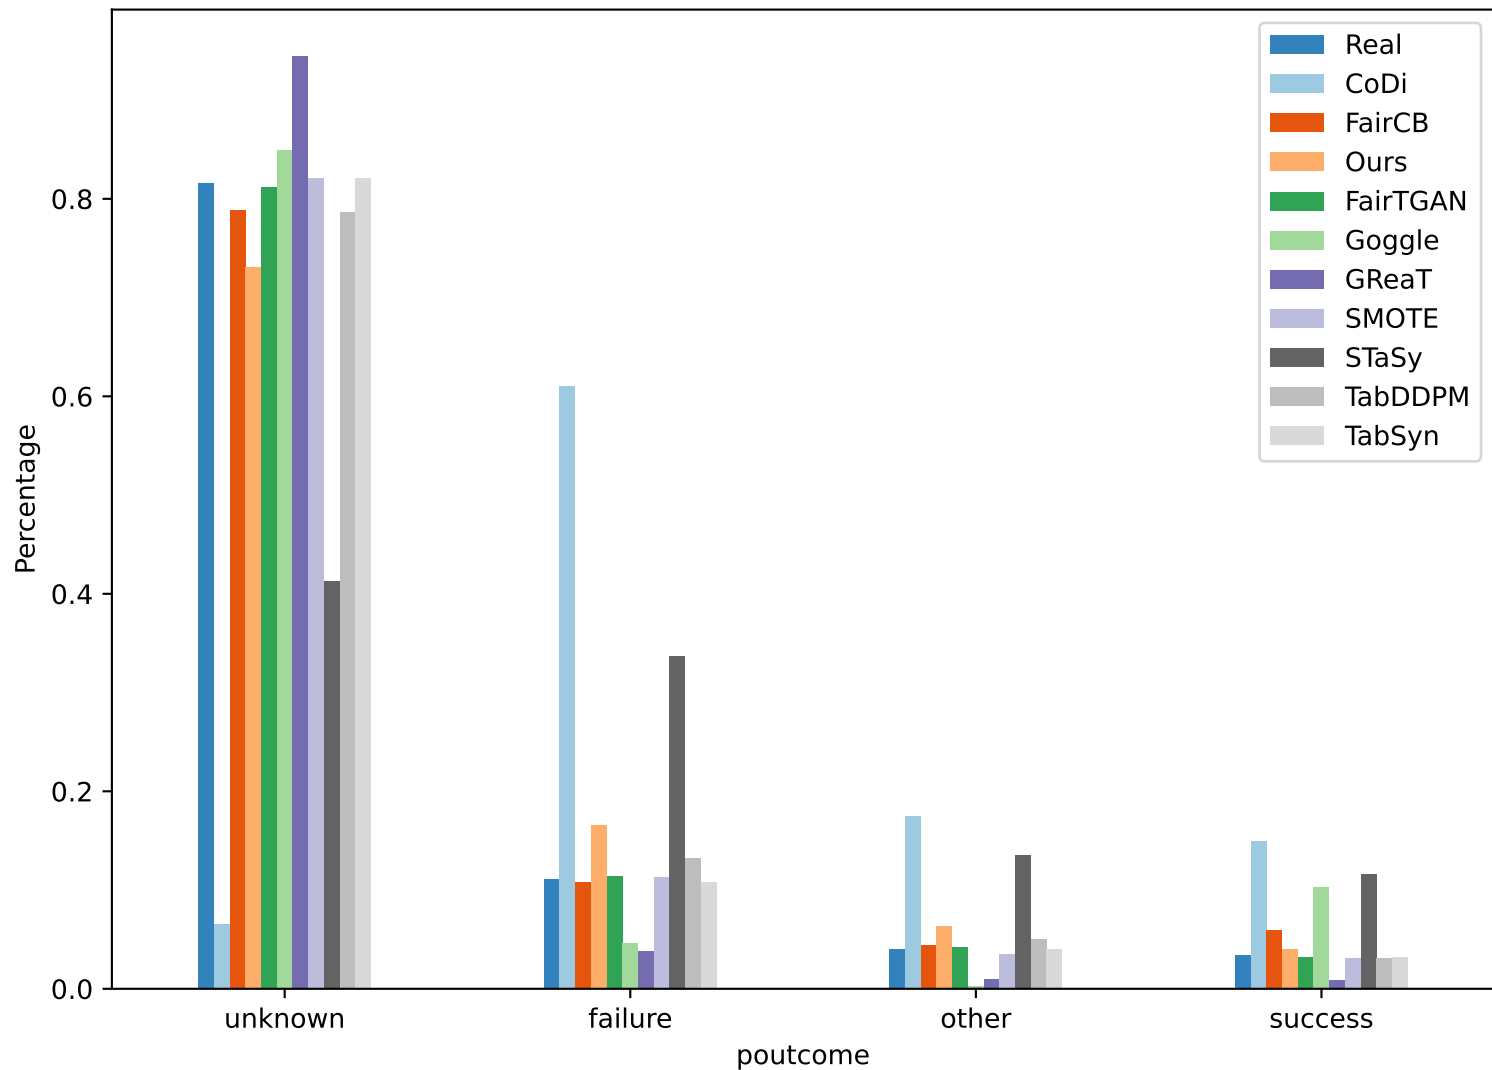

Supplement: supplementary_material [file attachment]

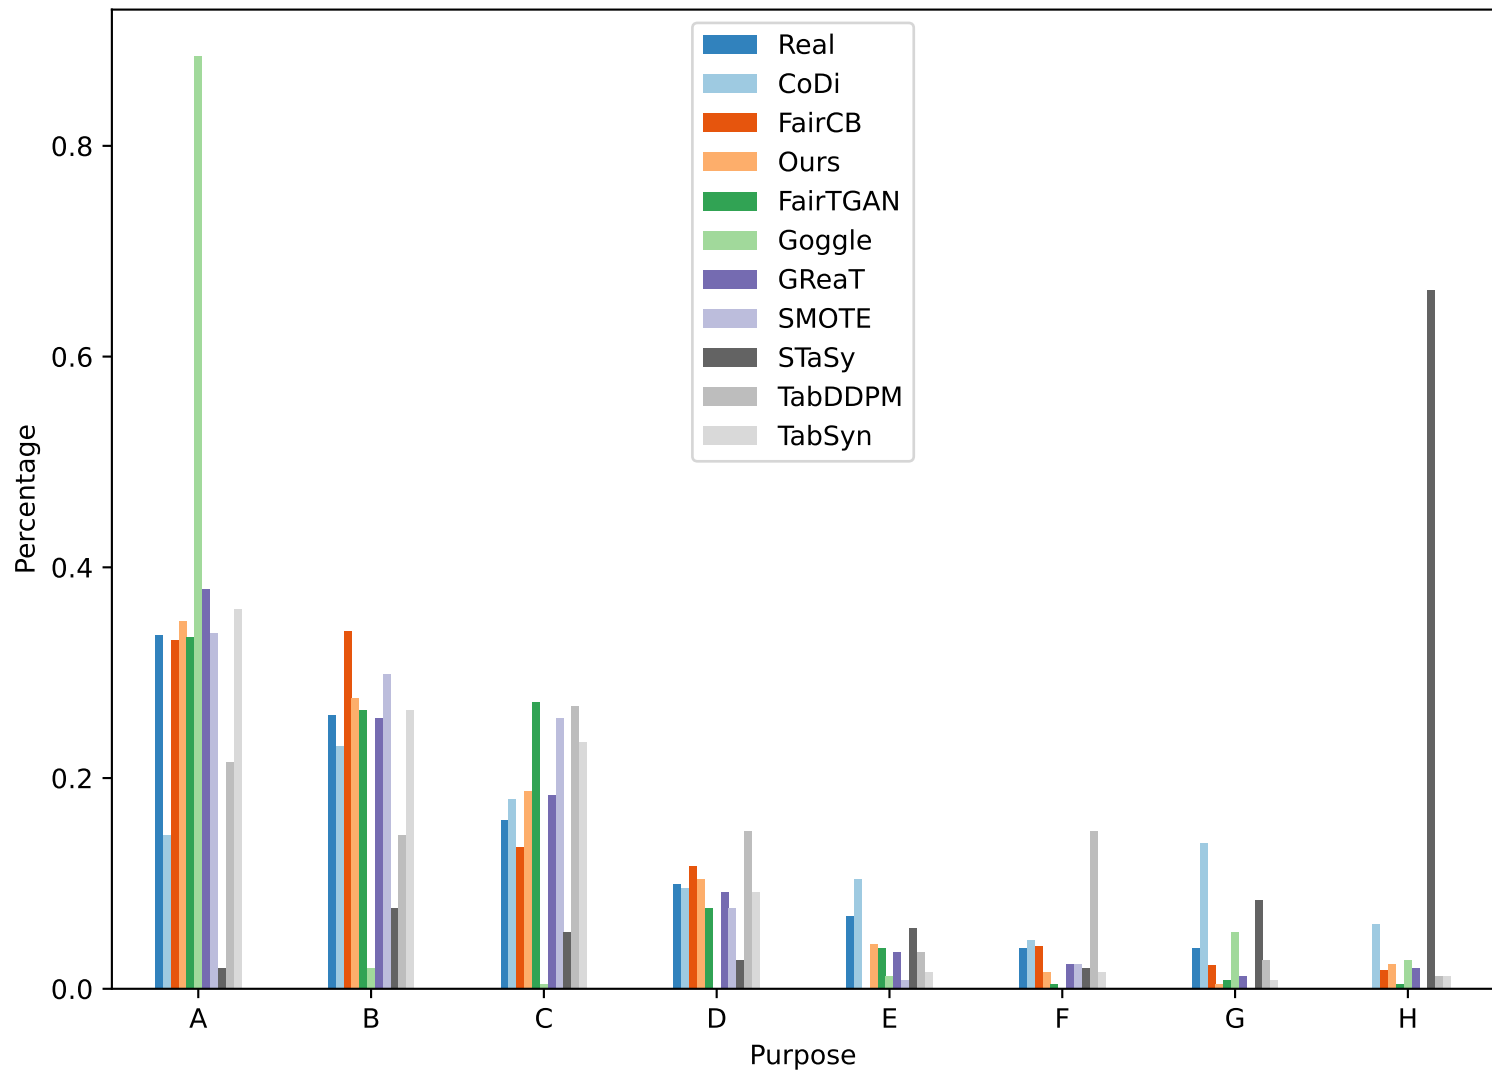

Supplement: supplementary_material [file attachment]

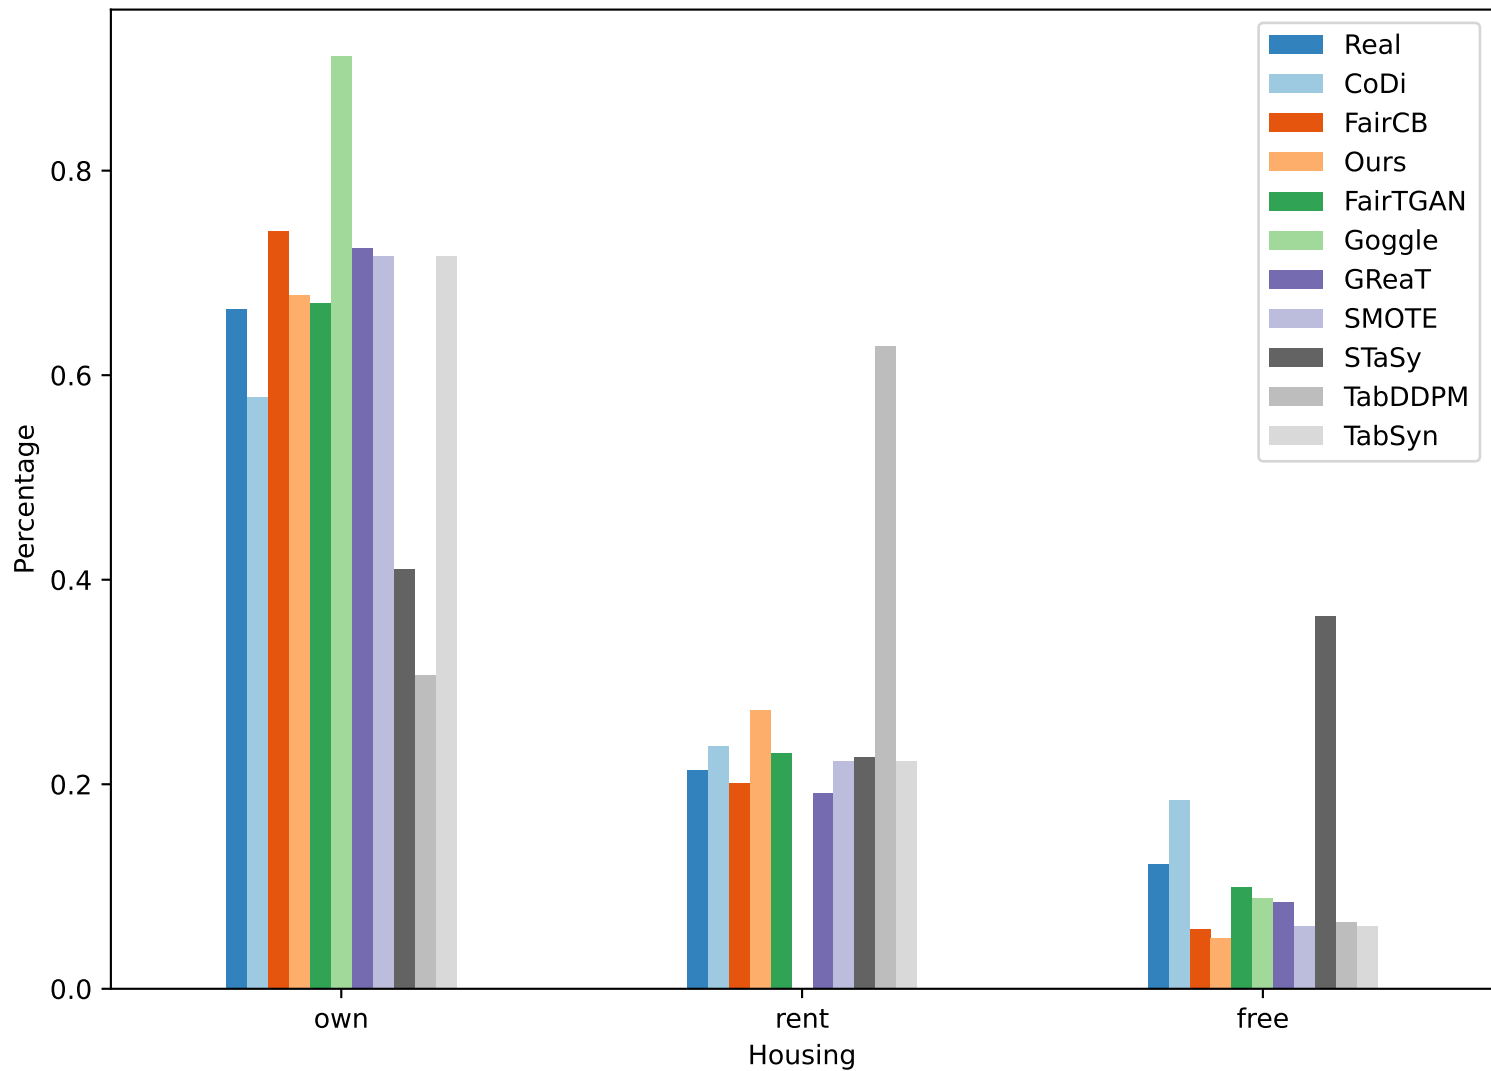

Supplement: supplementary_material [file attachment]

# (FairCB) sensitive attributes vs target label on the COMPAS dataset

## Sex

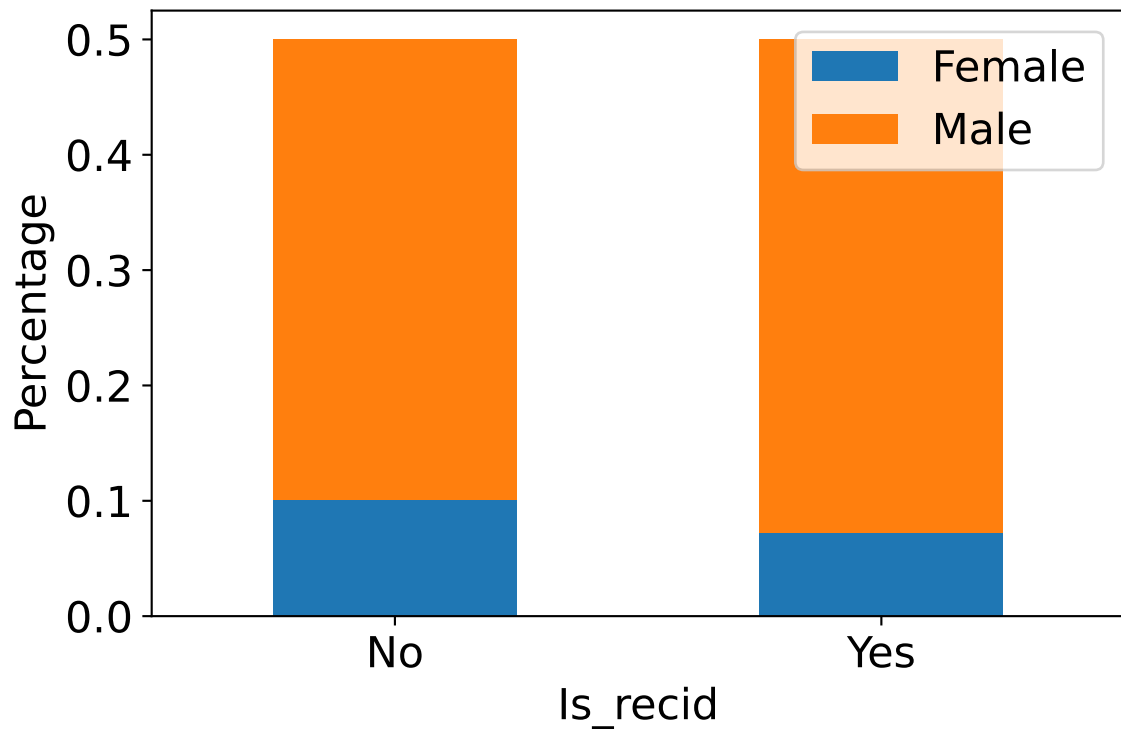

## Race

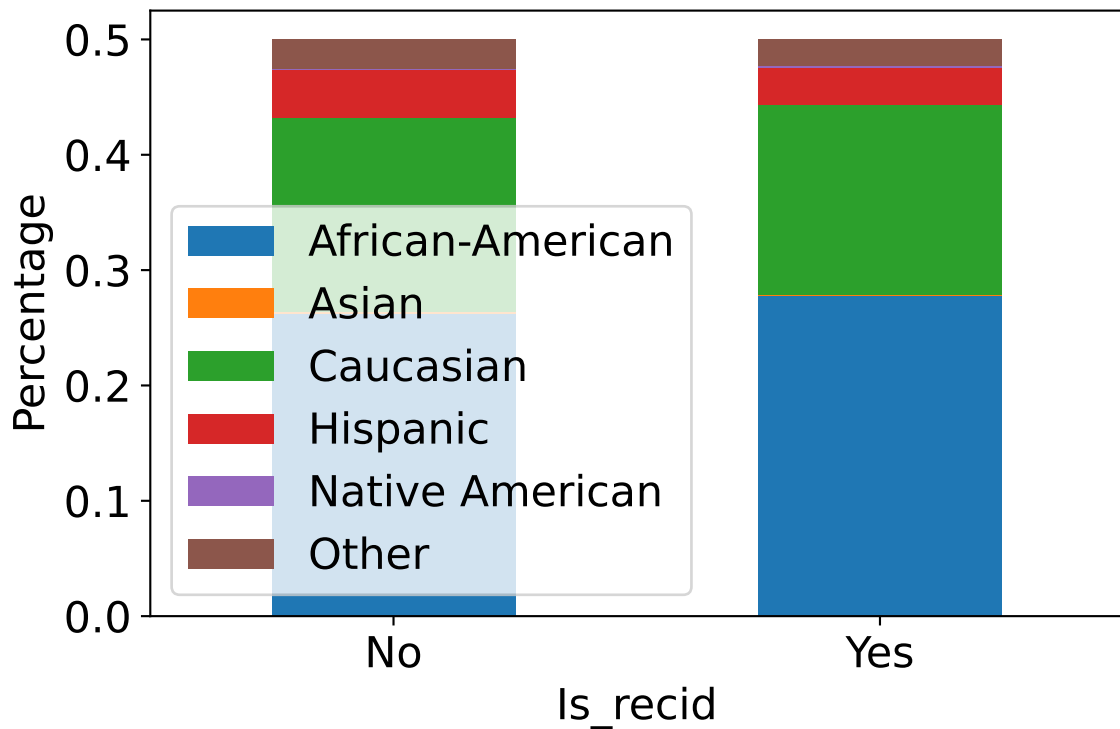

Supplement: supplementary_material [file attachment]

COMPAS

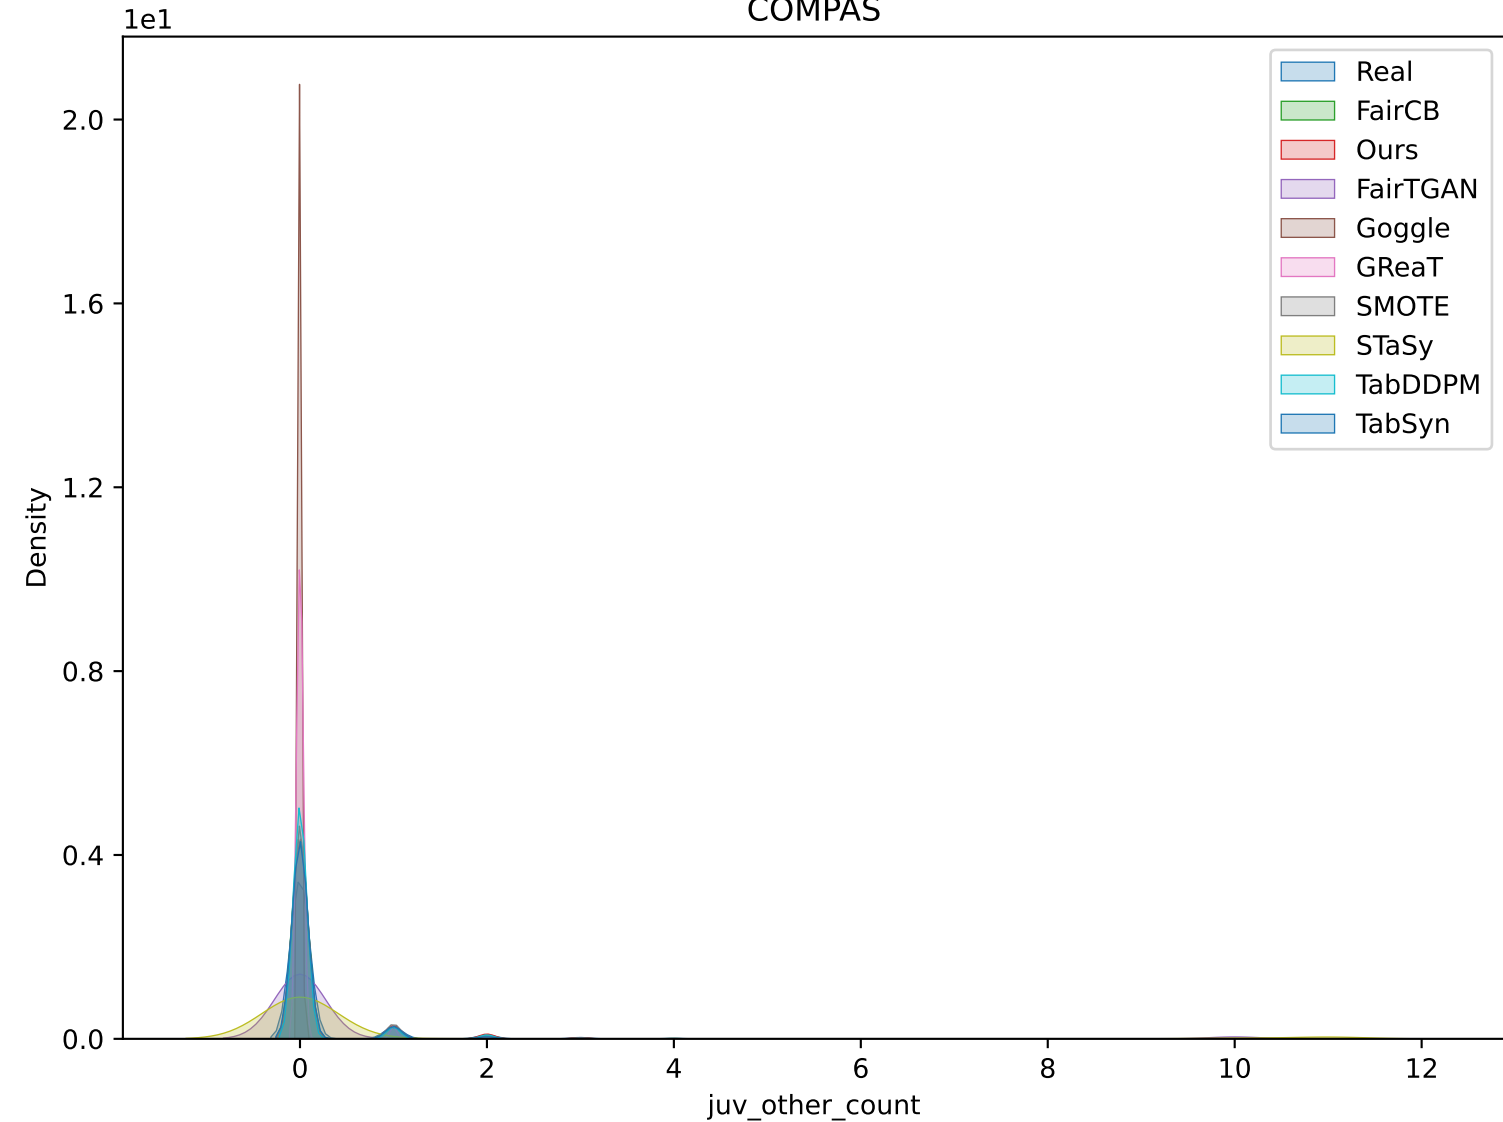

Supplement: supplementary_material [file attachment]

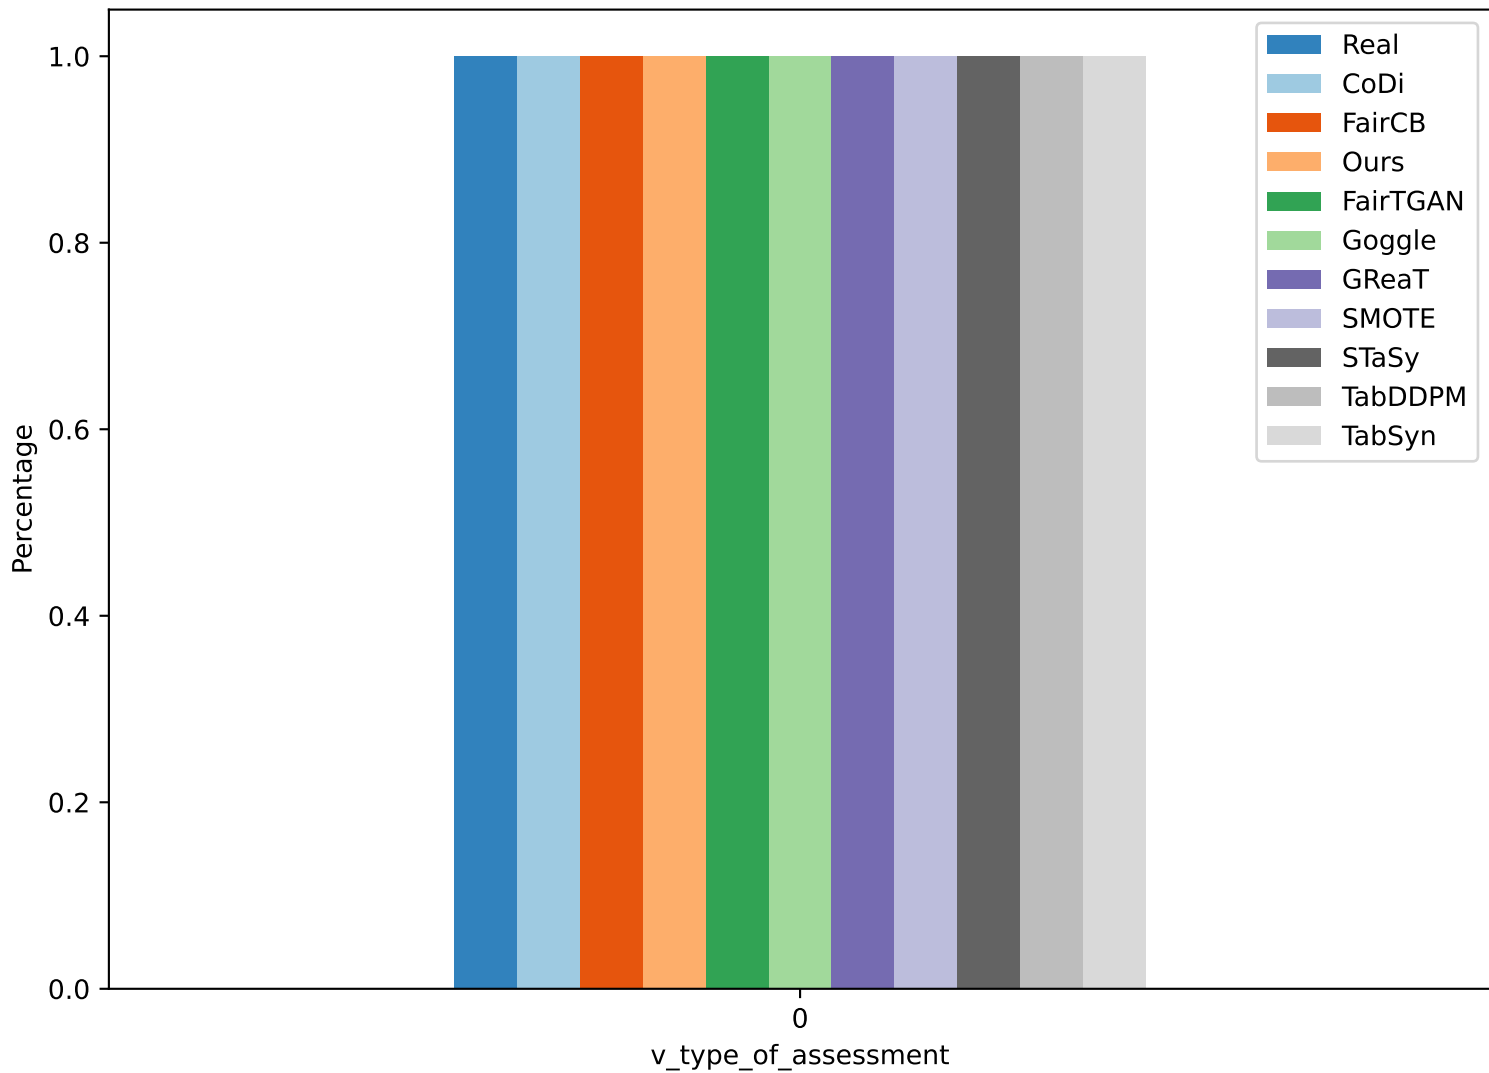

Supplement: supplementary_material [file attachment]

# (FairTGAN) sensitive attributes vs target label on the Bank dataset

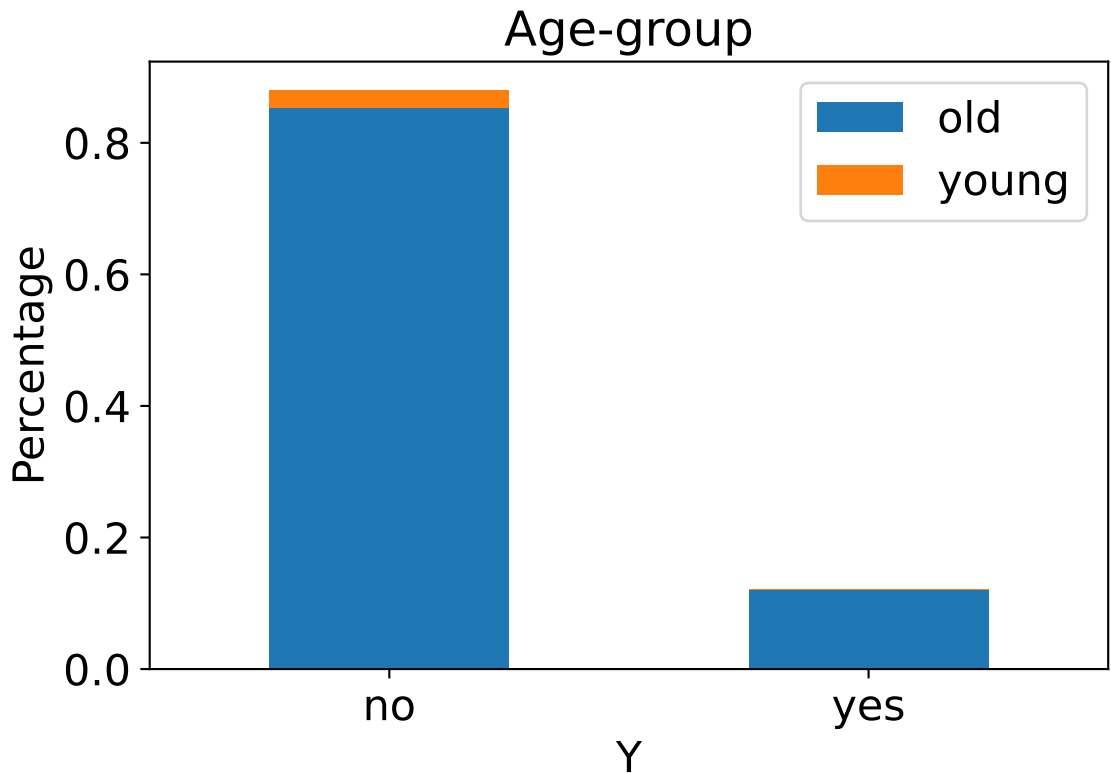

Supplement: supplementary_material [file attachment]

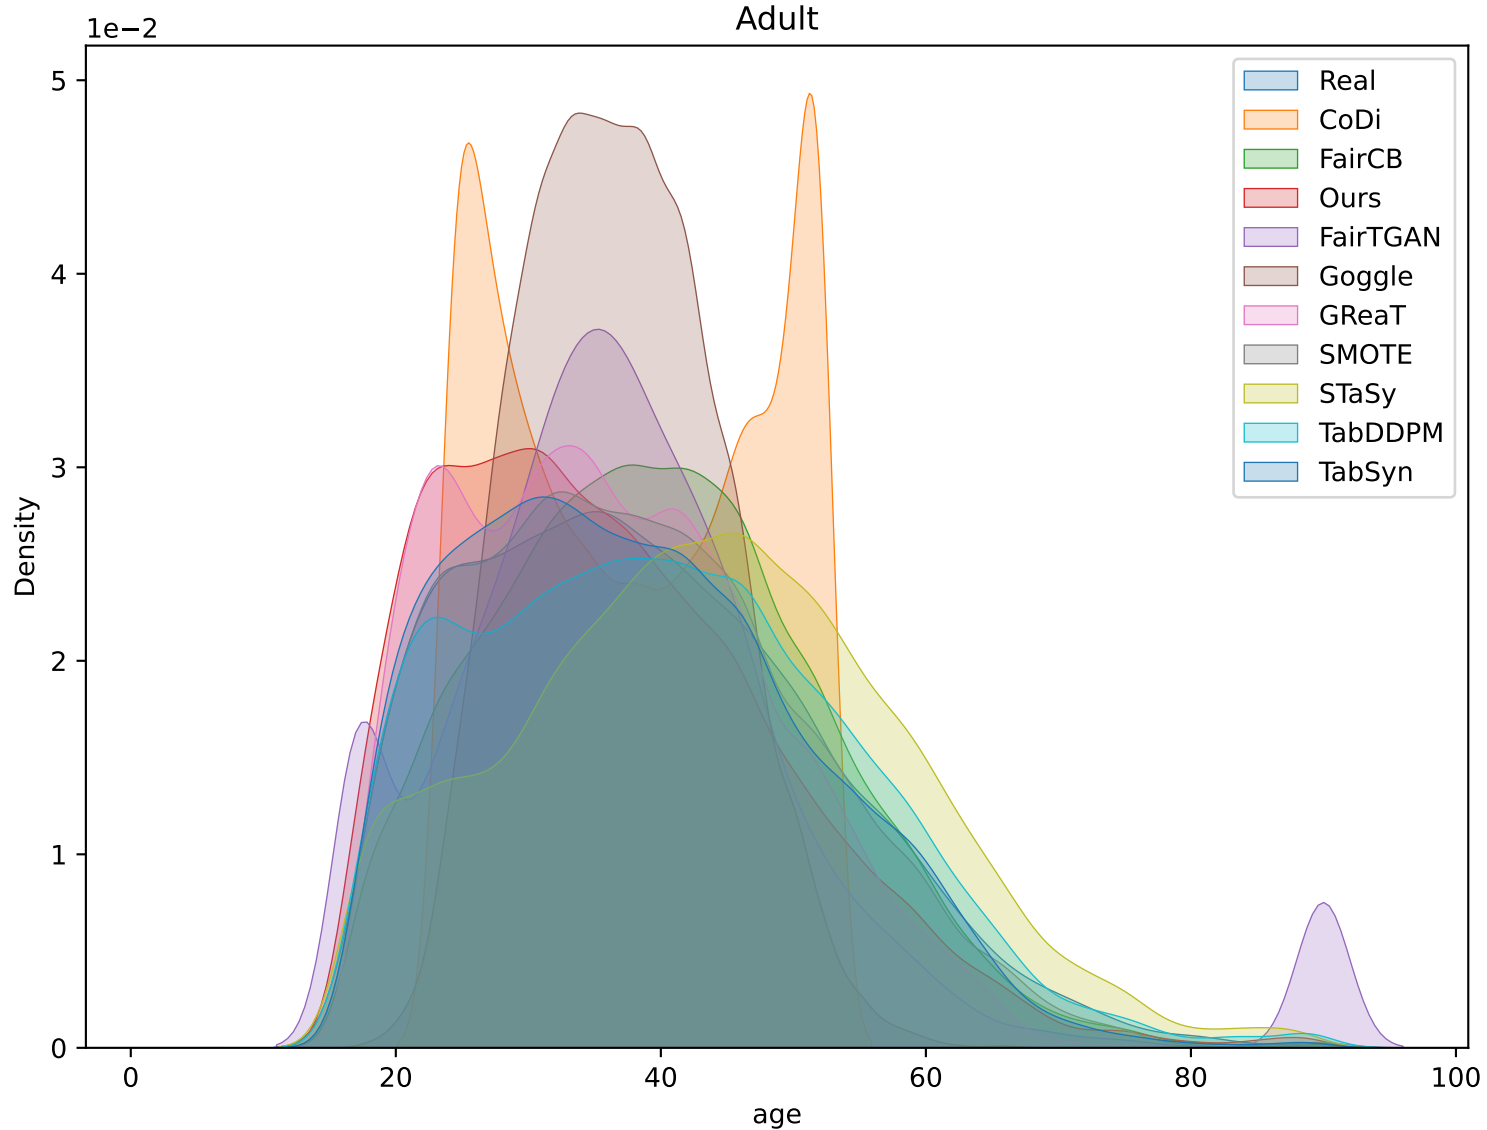

Supplement: supplementary_material [file attachment]

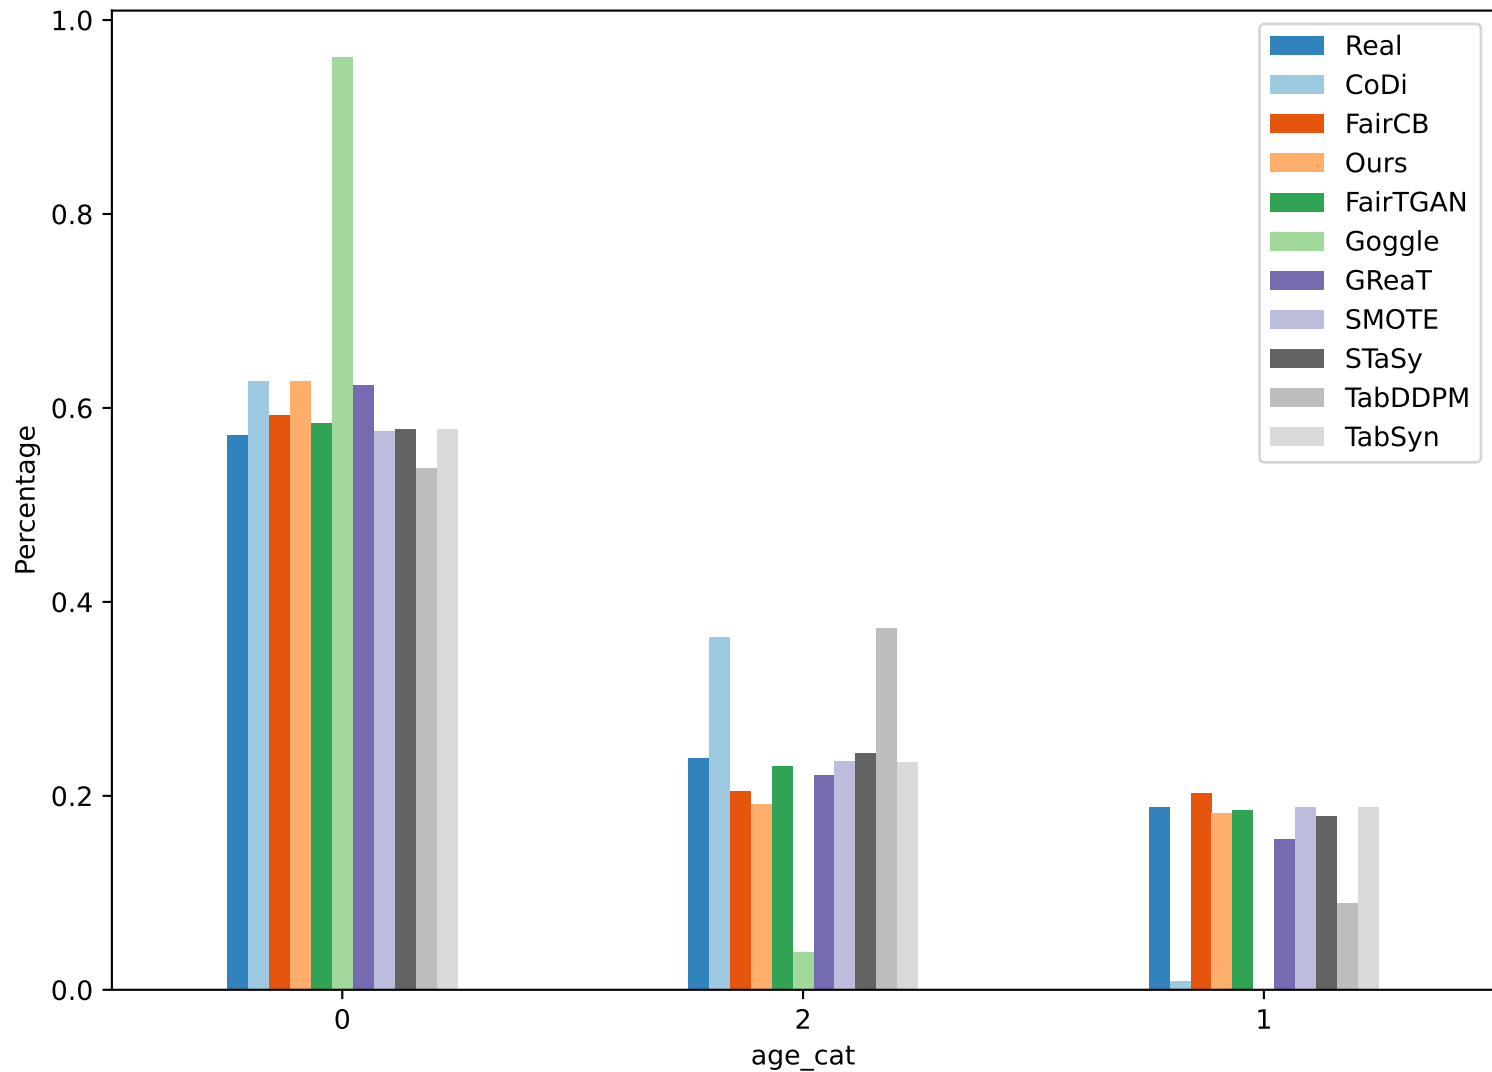

Supplement: supplementary_material [file attachment]

German

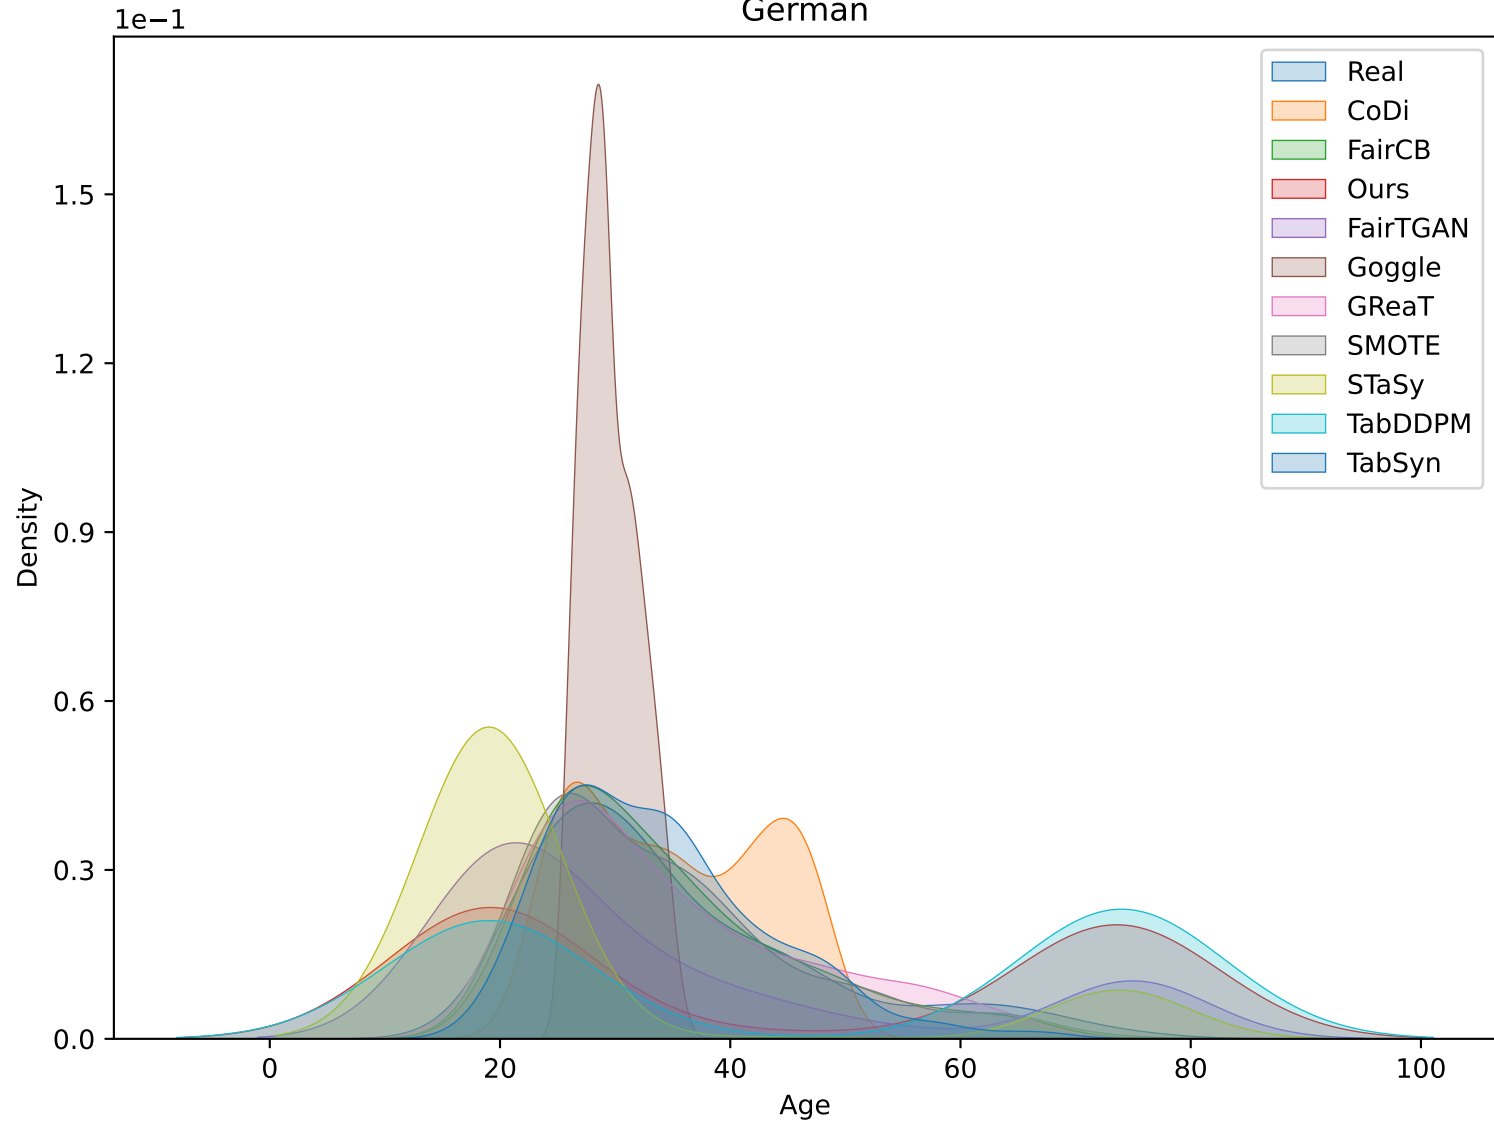

Supplement: supplementary_material [file attachment]

Heatmap of Contingency Tables for Real and Synthetic Data on COMPAS Dataset

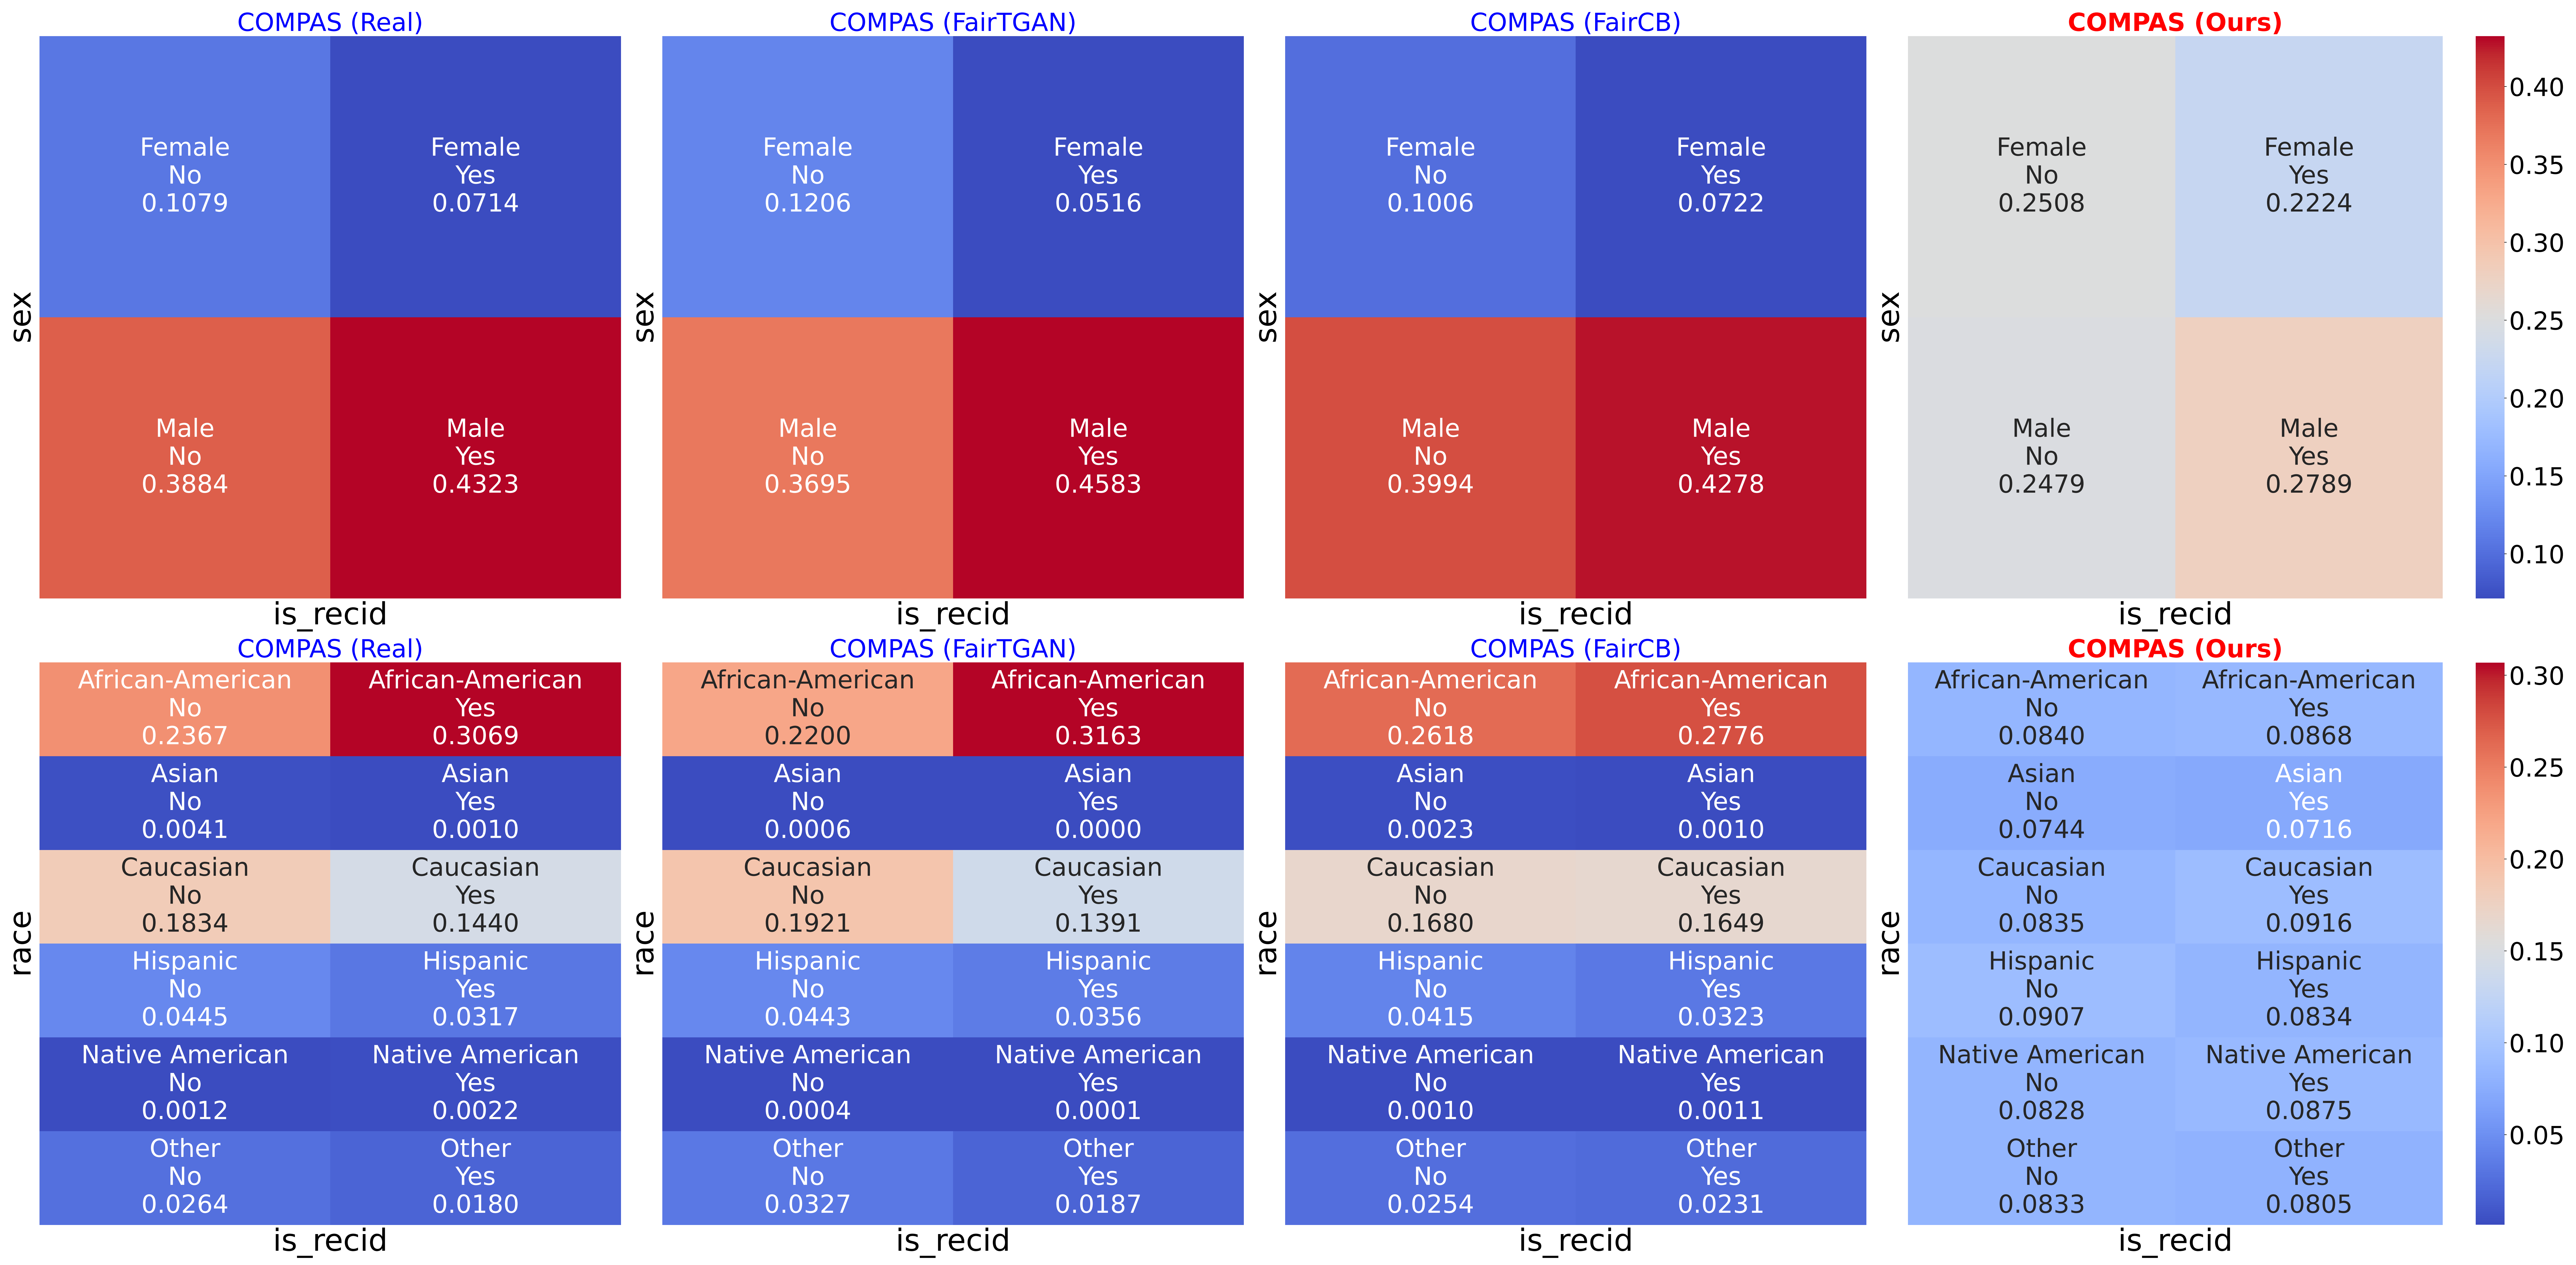

Supplement: supplementary_material [file attachment]

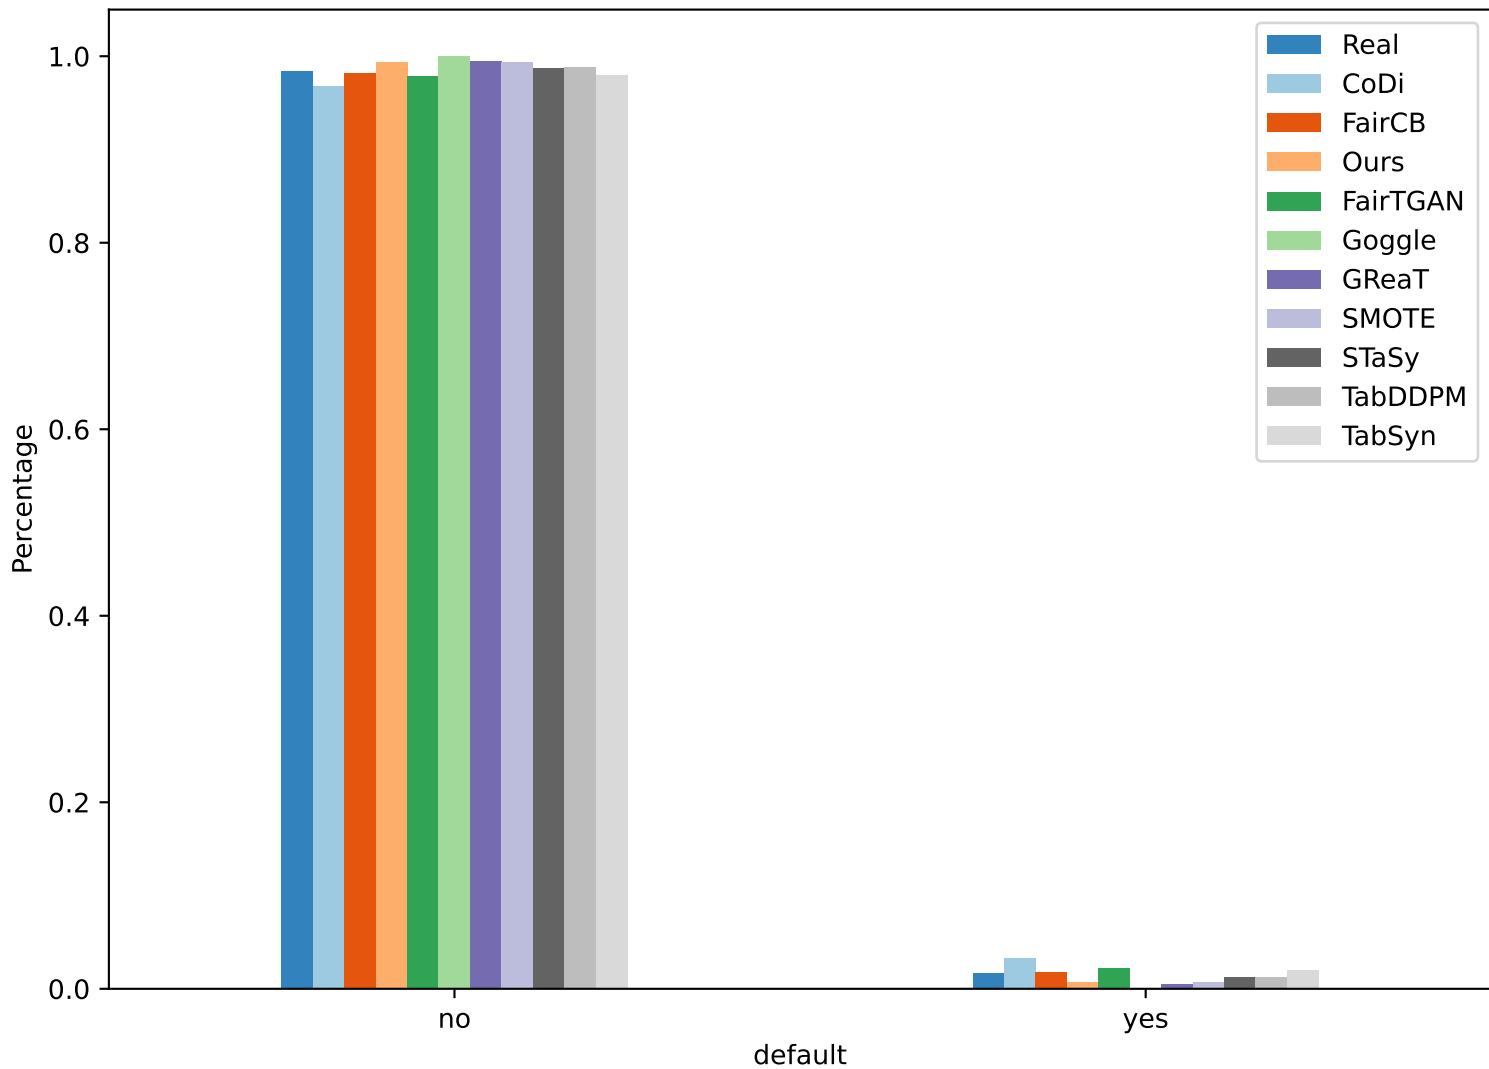

Supplement: supplementary_material [file attachment]

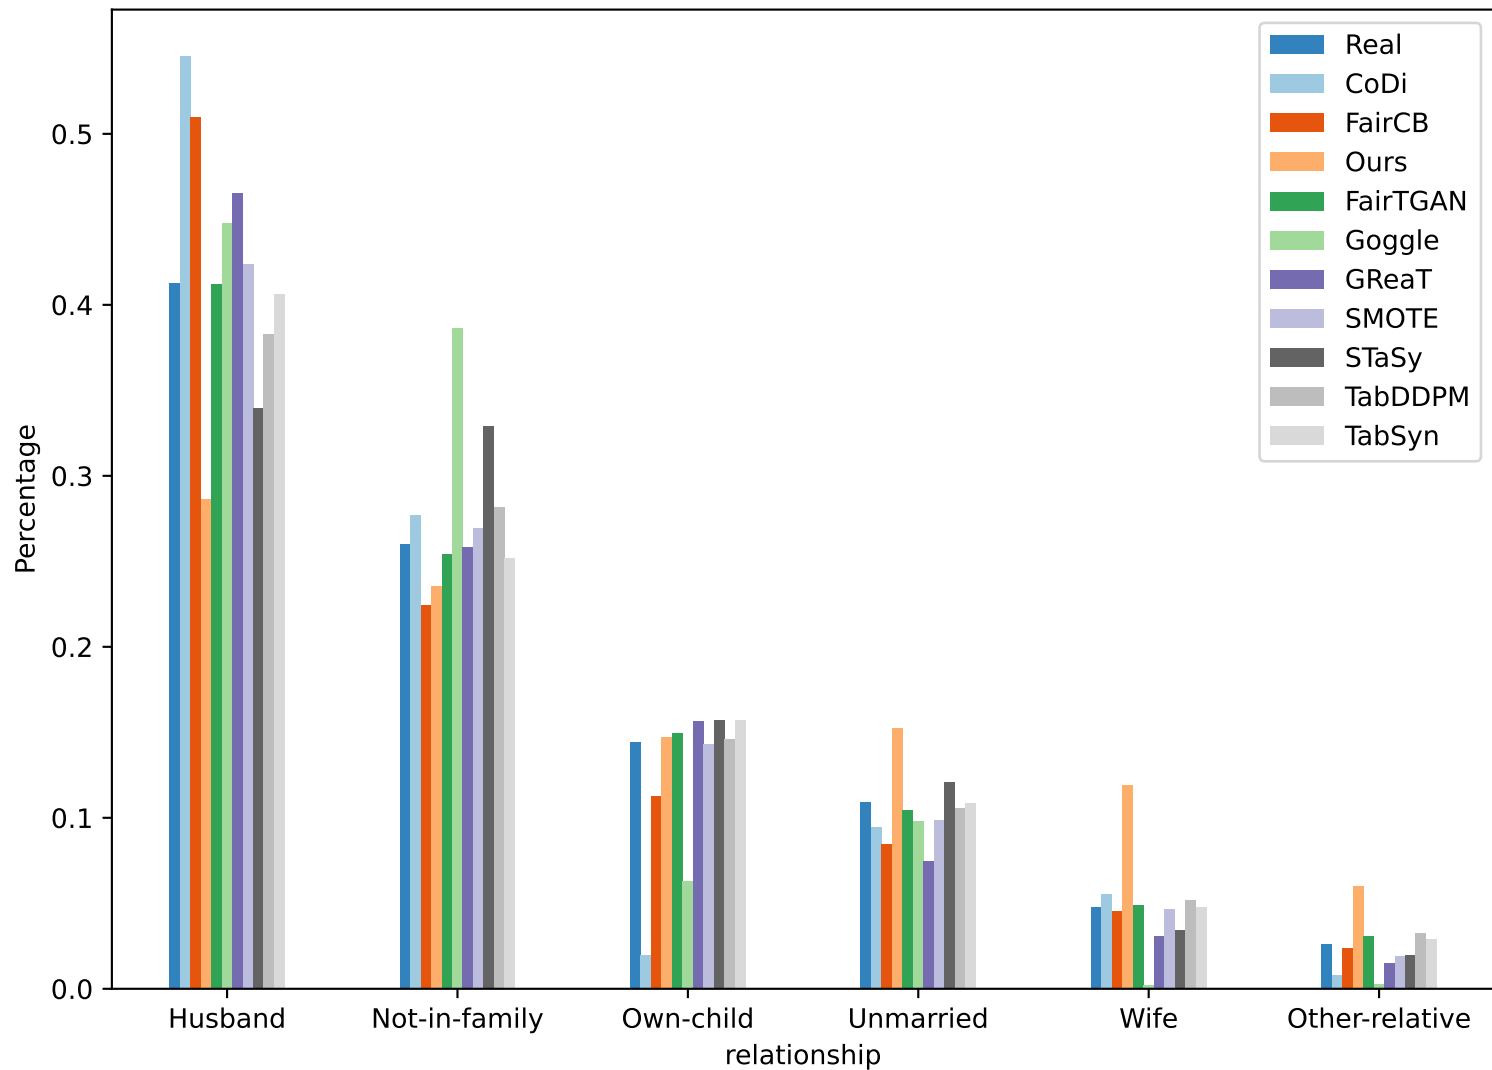

Supplement: supplementary_material [file attachment]

# (Real) sensitive attributes vs target label on the Adult dataset

## Sex

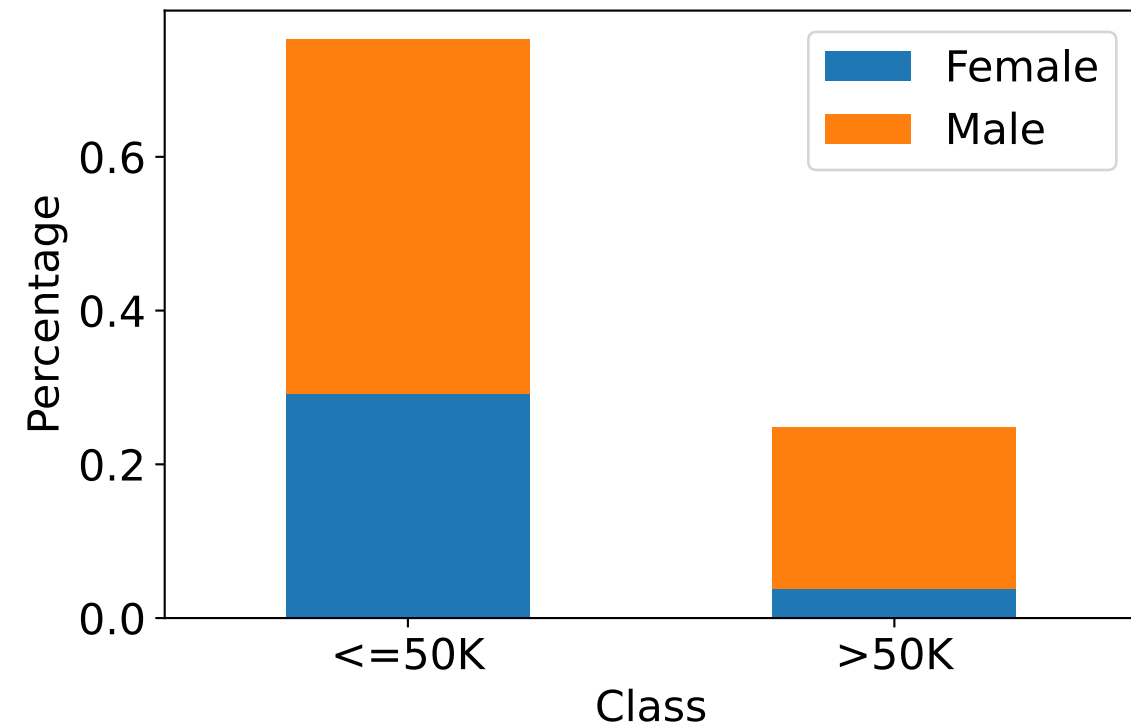

## Race

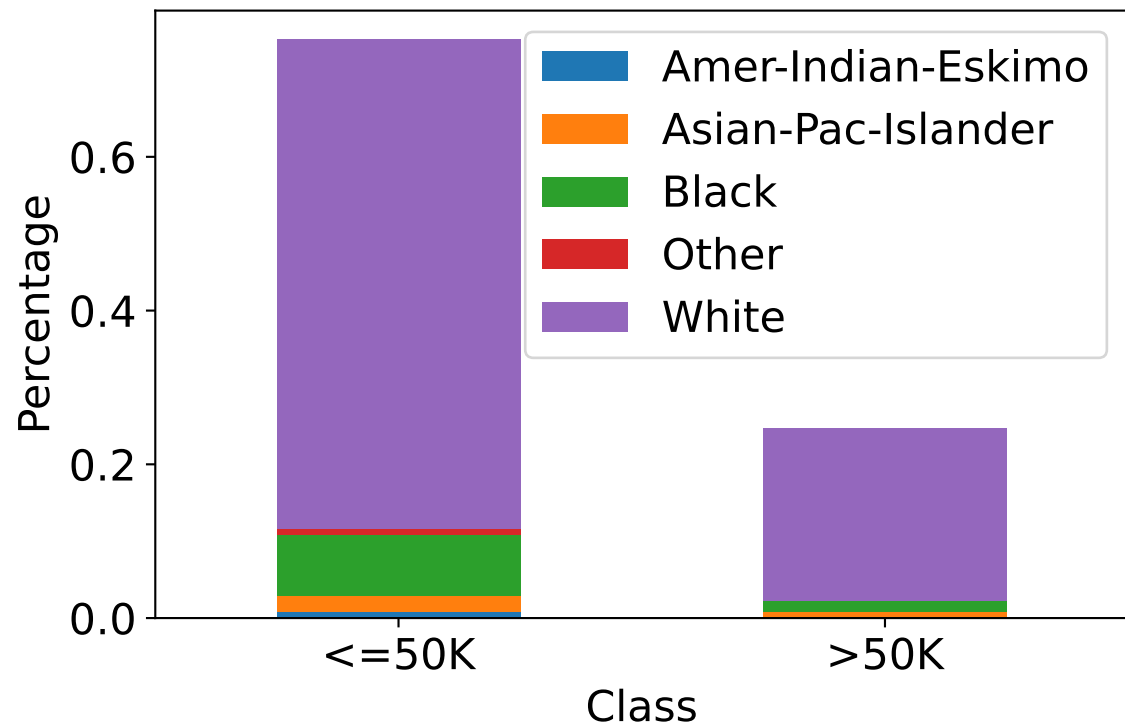

Supplement: supplementary_material [file attachment]

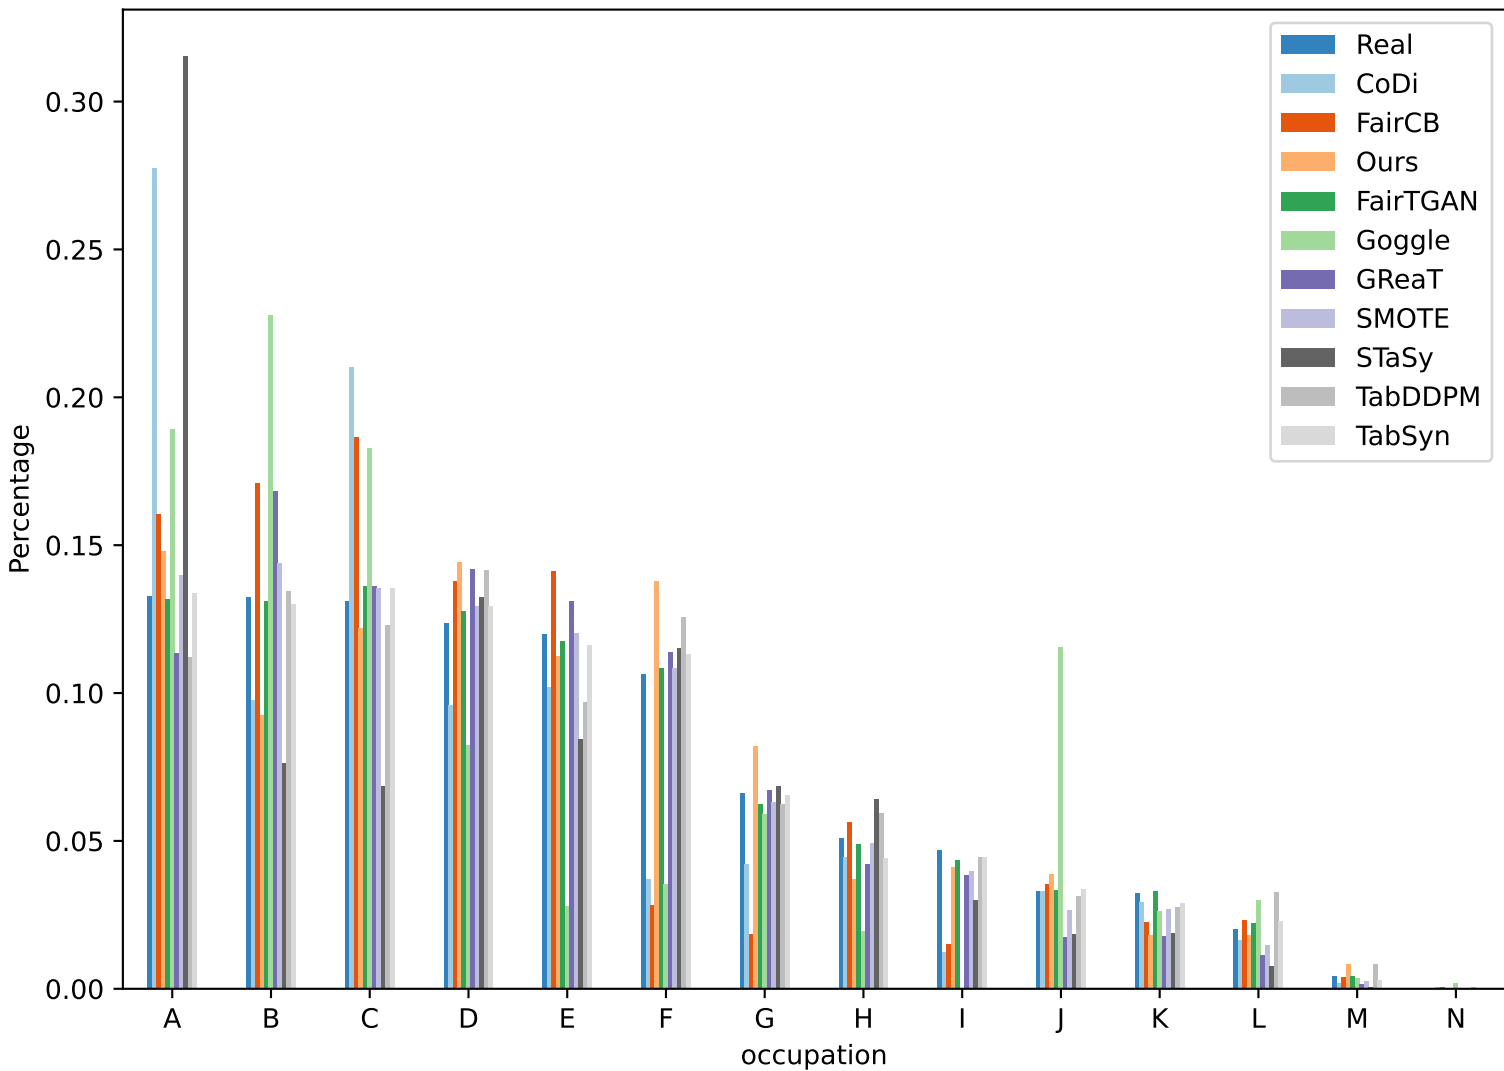

Supplement: supplementary_material [file attachment]

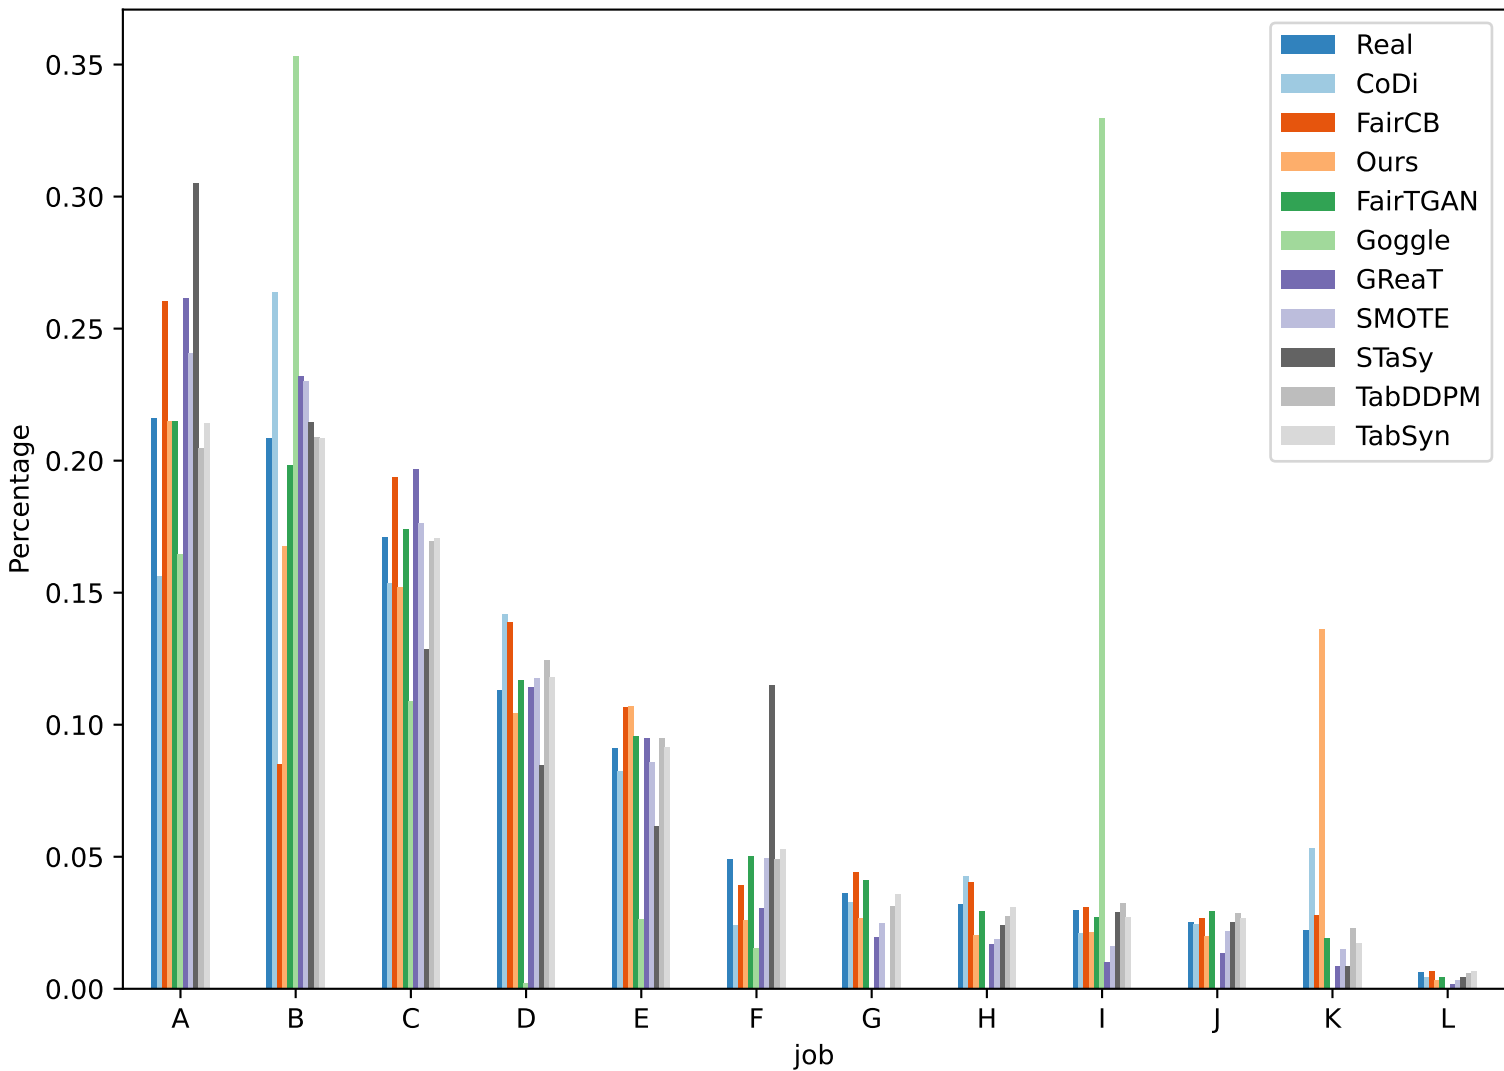

Supplement: supplementary_material [file attachment]

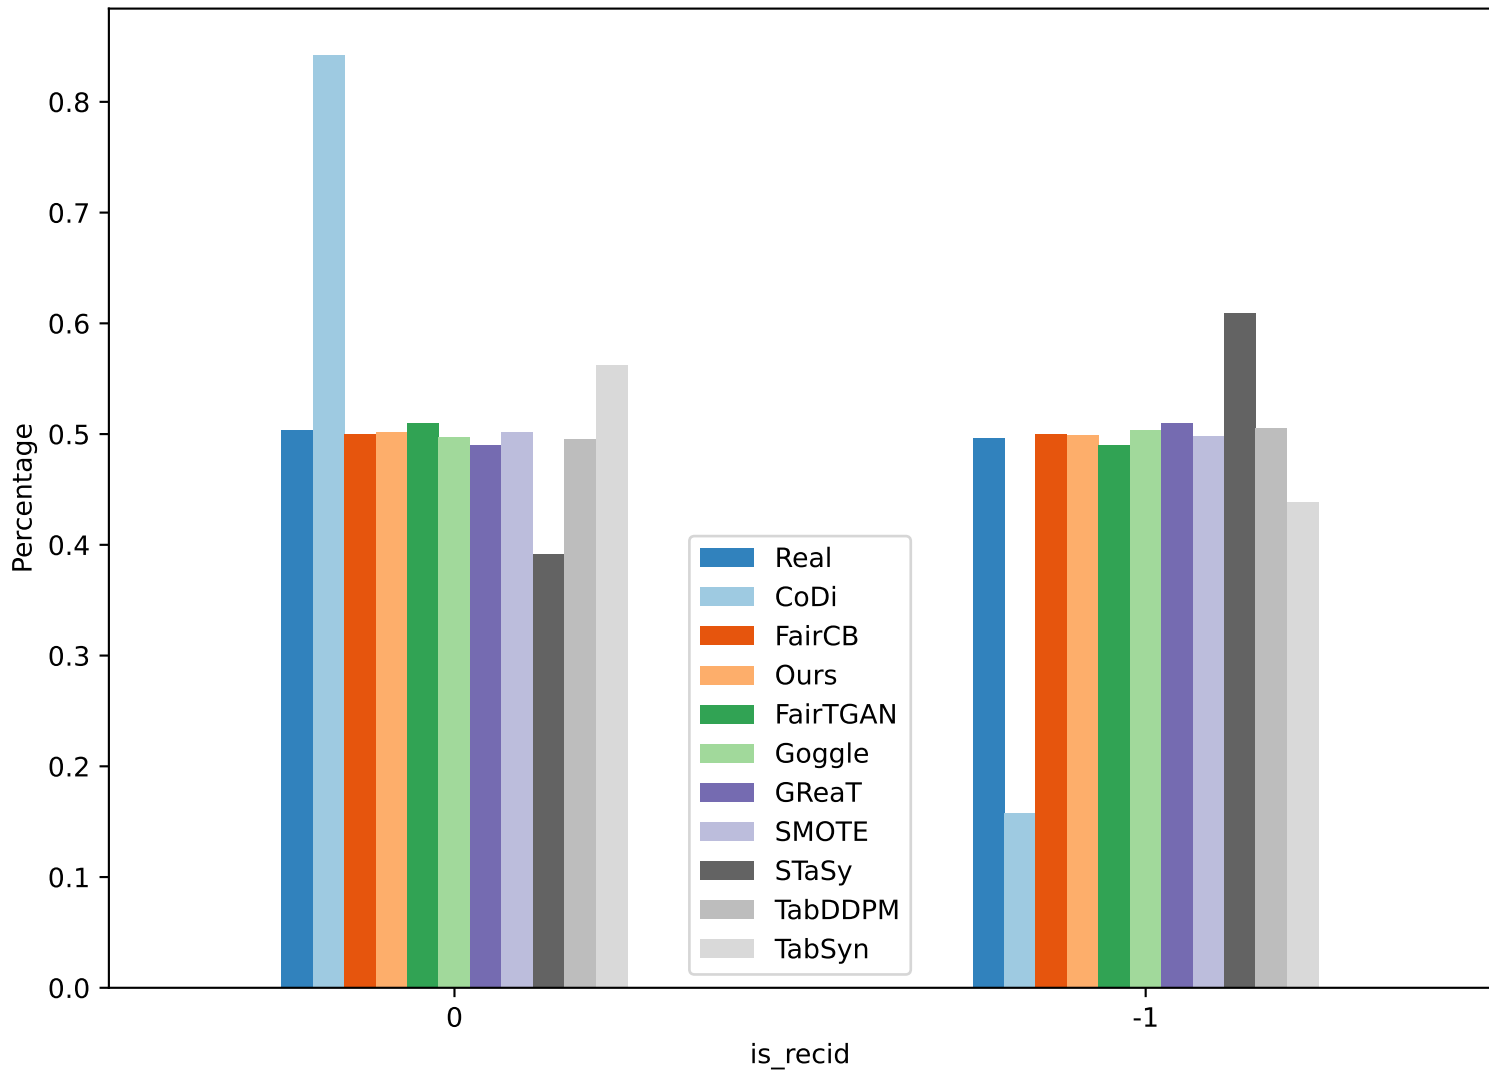

Supplement: supplementary_material [file attachment]

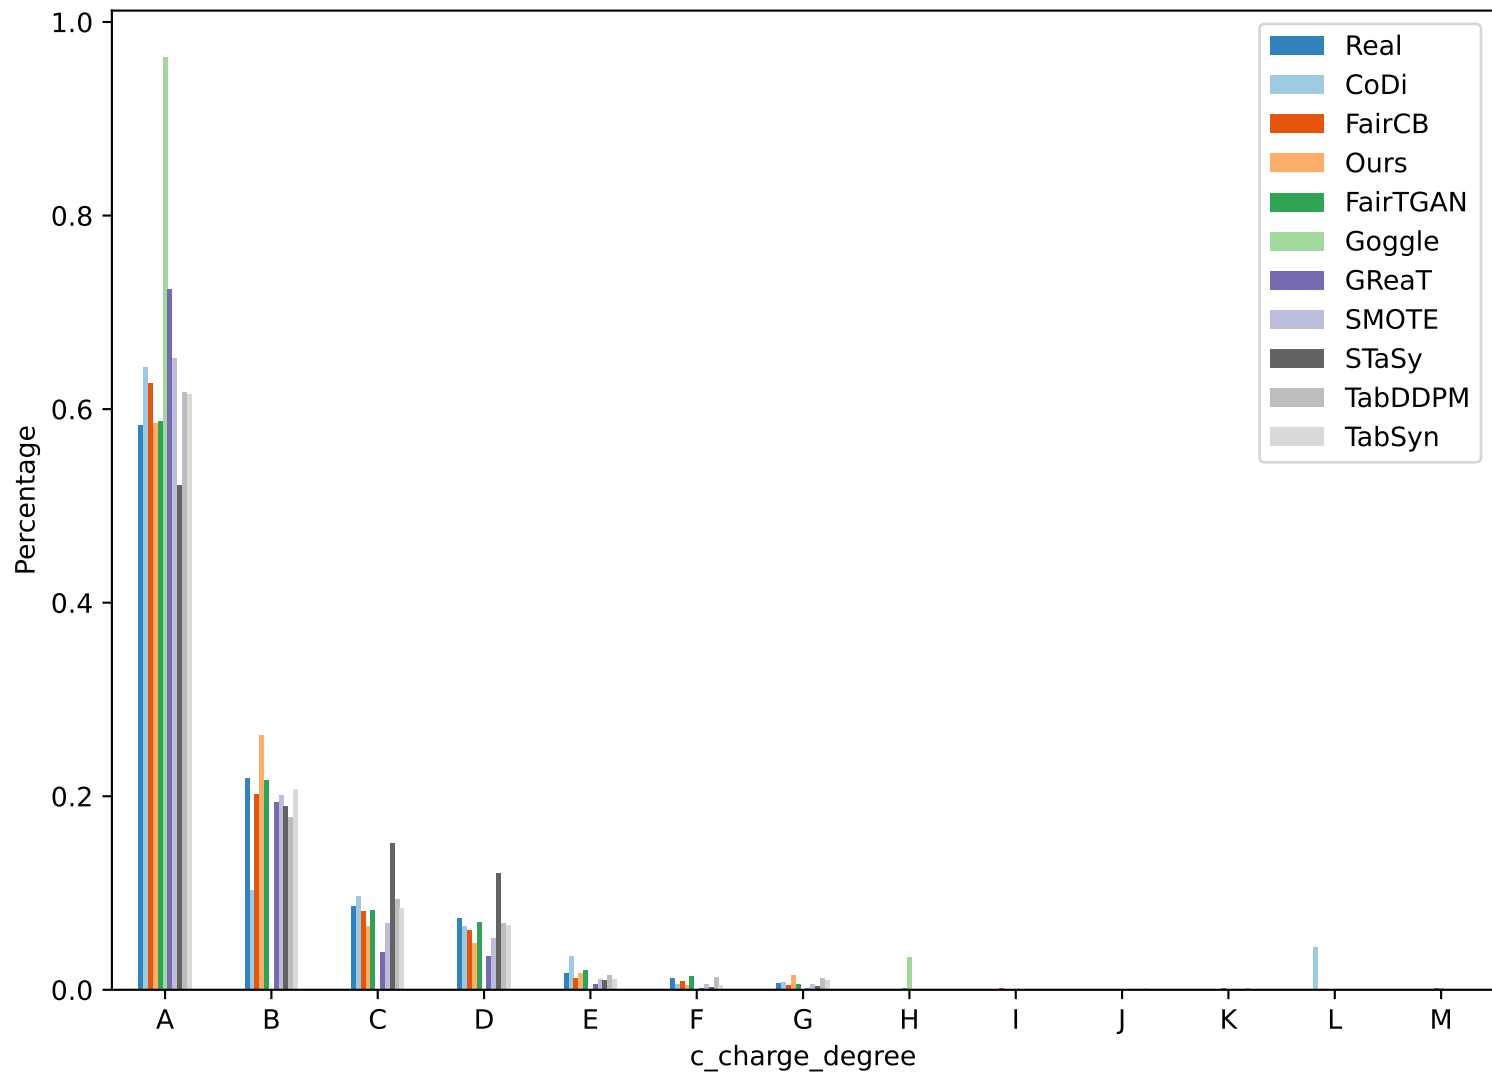

Supplement: supplementary_material [file attachment]

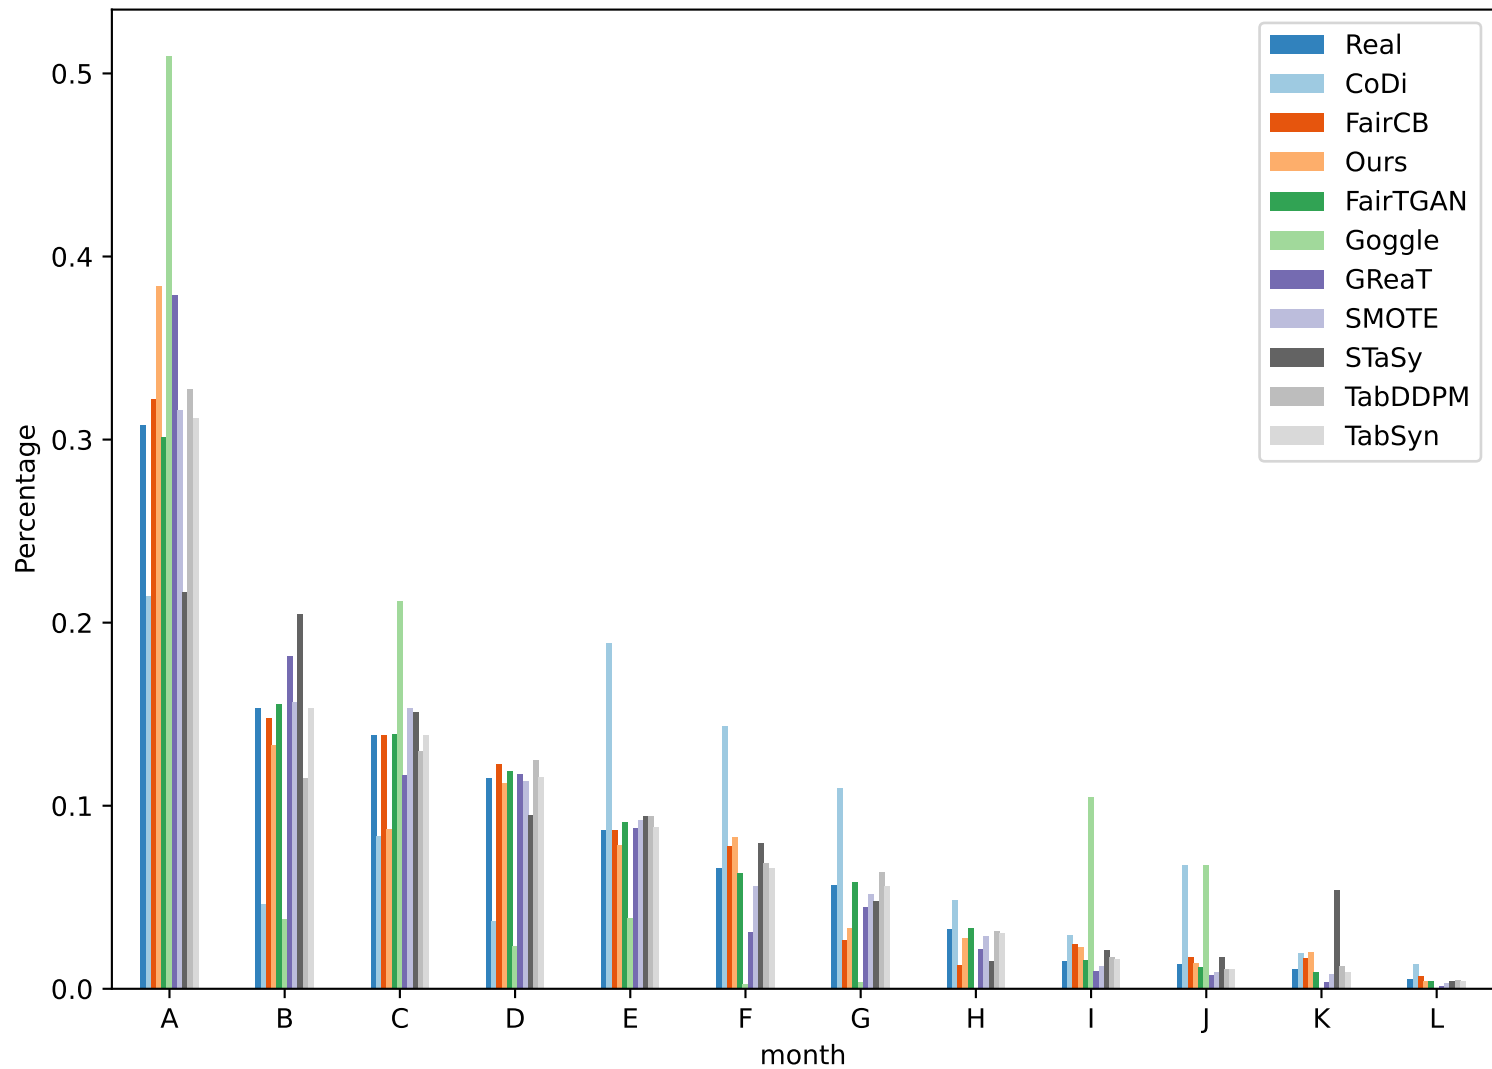

Supplement: supplementary_material [file attachment]

# (FairTGAN) sensitive attributes vs target label on the COMPAS dataset

## Sex

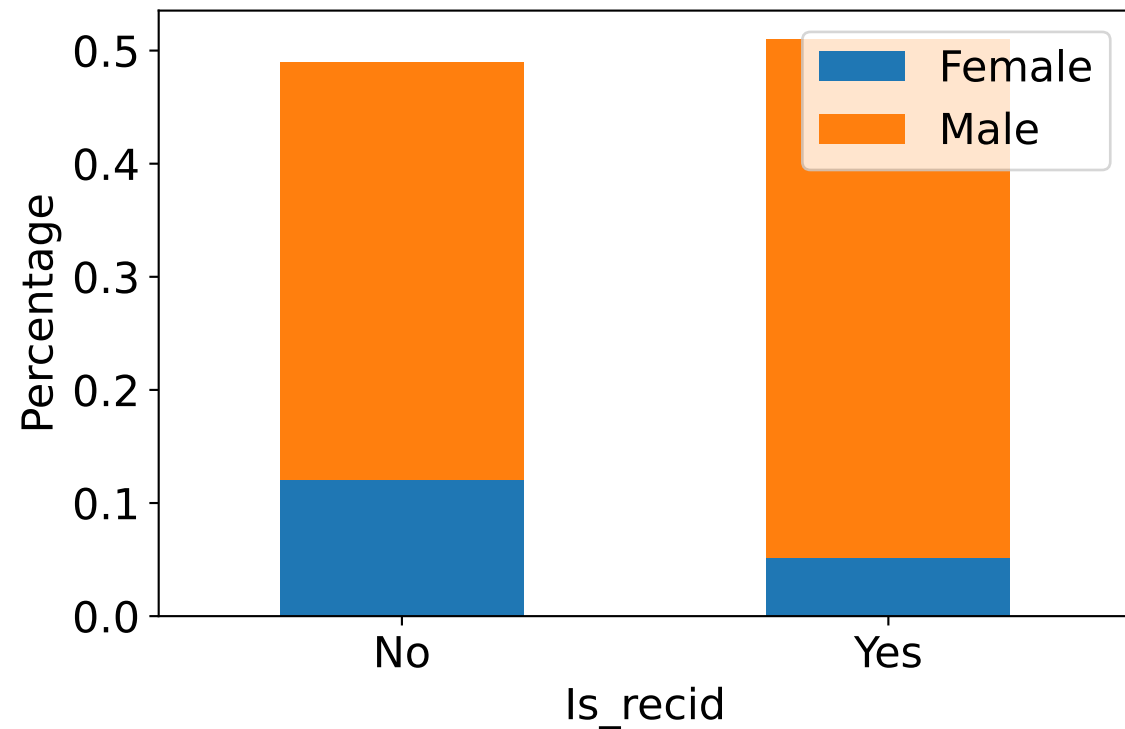

## Race

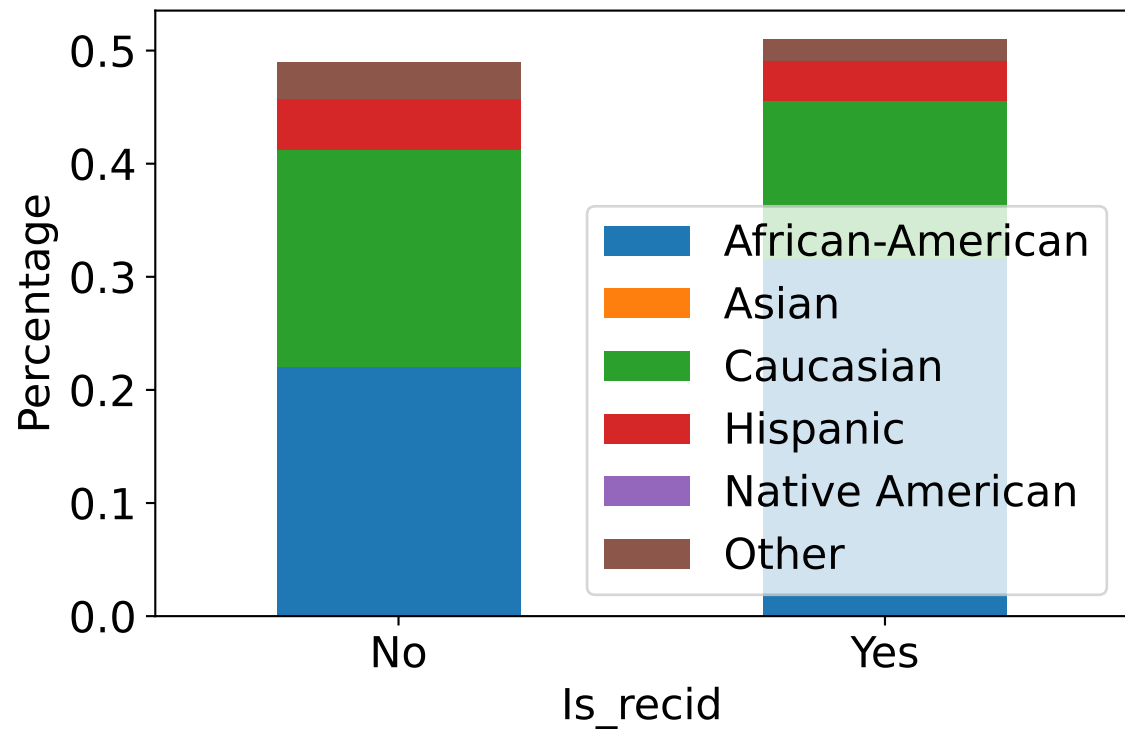

Supplement: supplementary_material [file attachment]

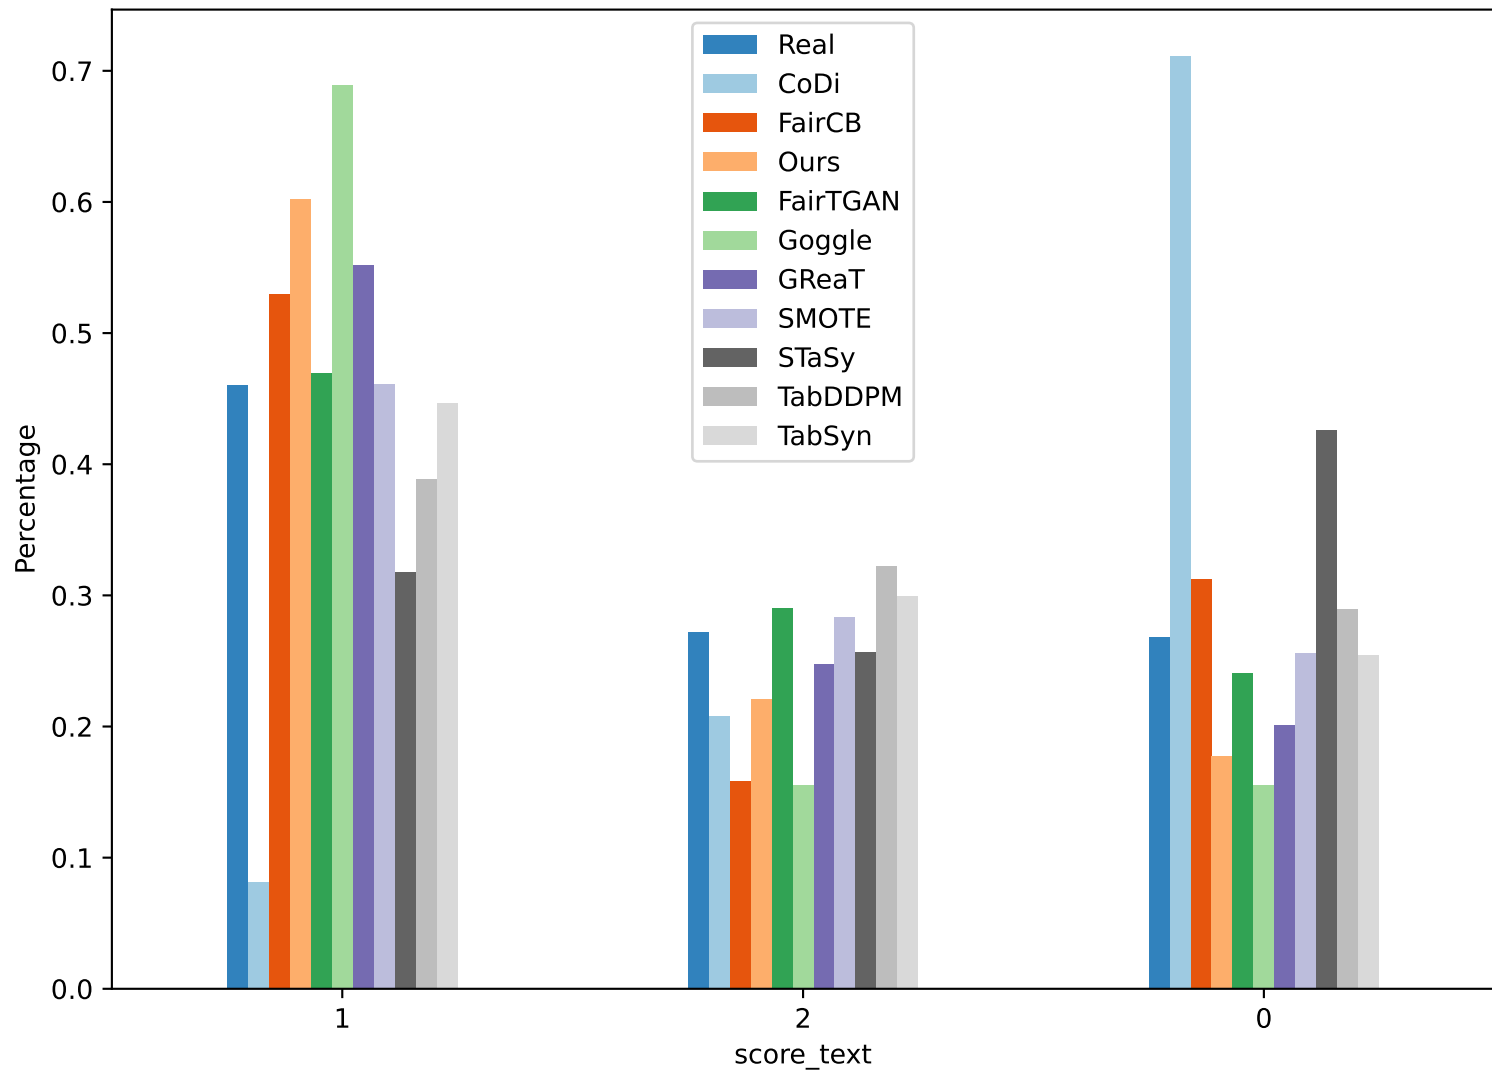

Supplement: supplementary_material [file attachment]

Adult

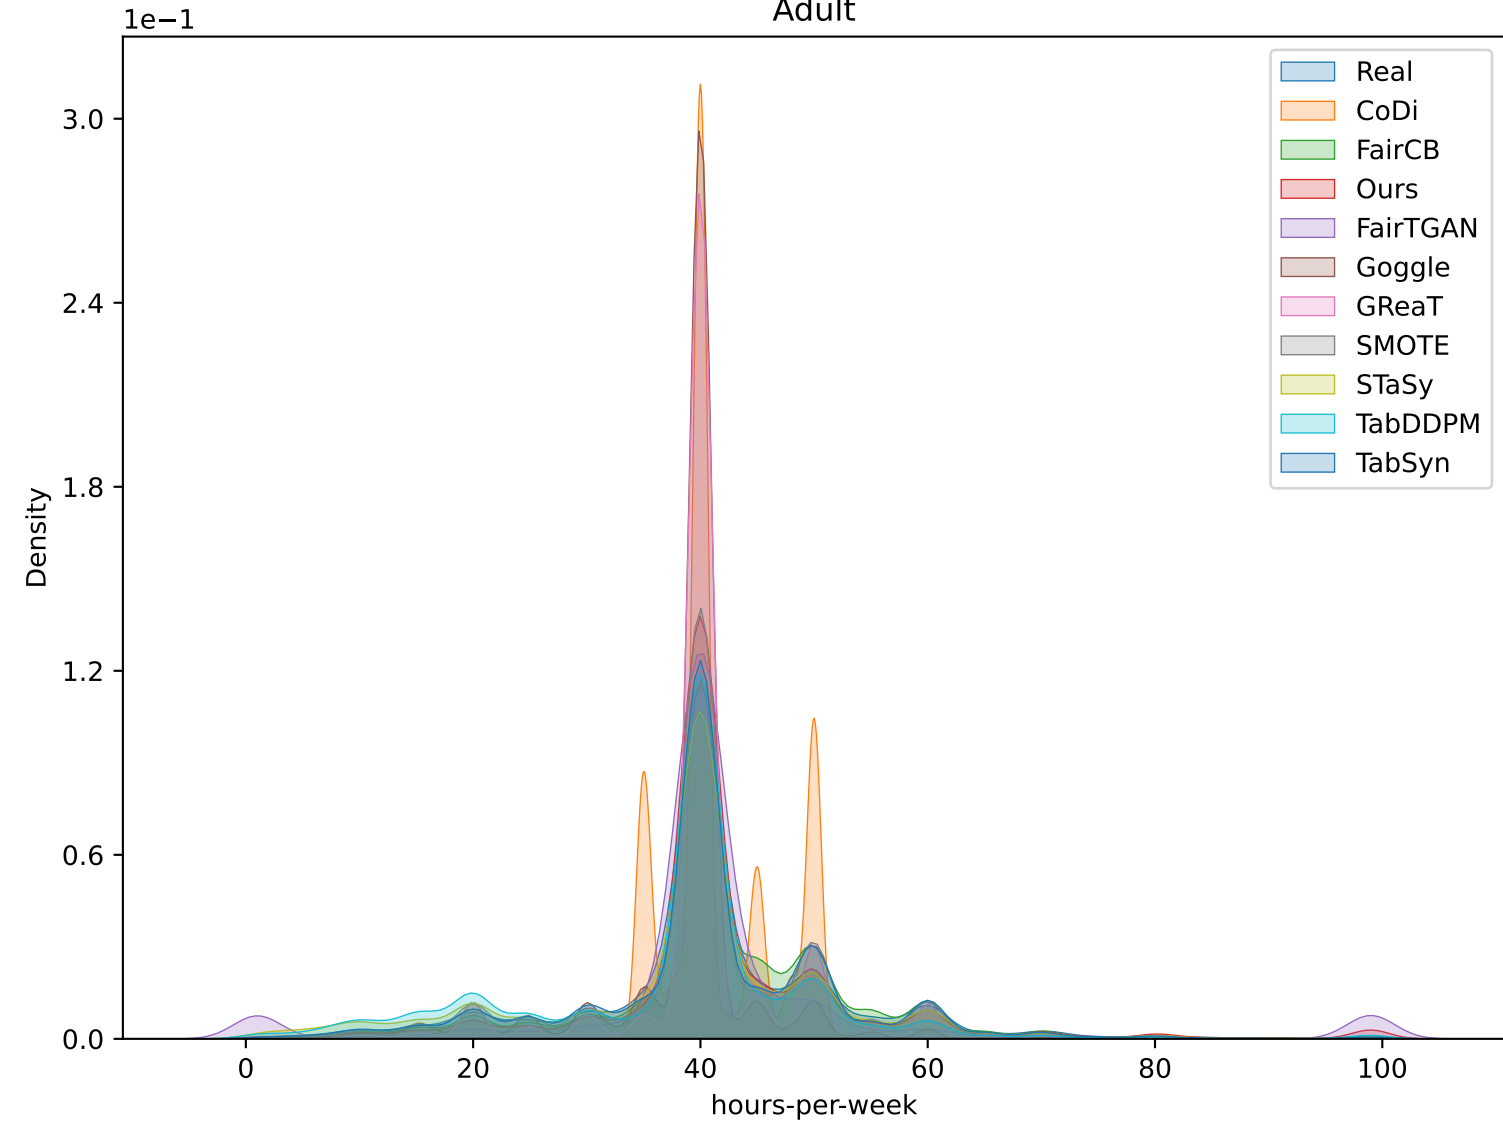

Supplement: supplementary_material [file attachment]

German

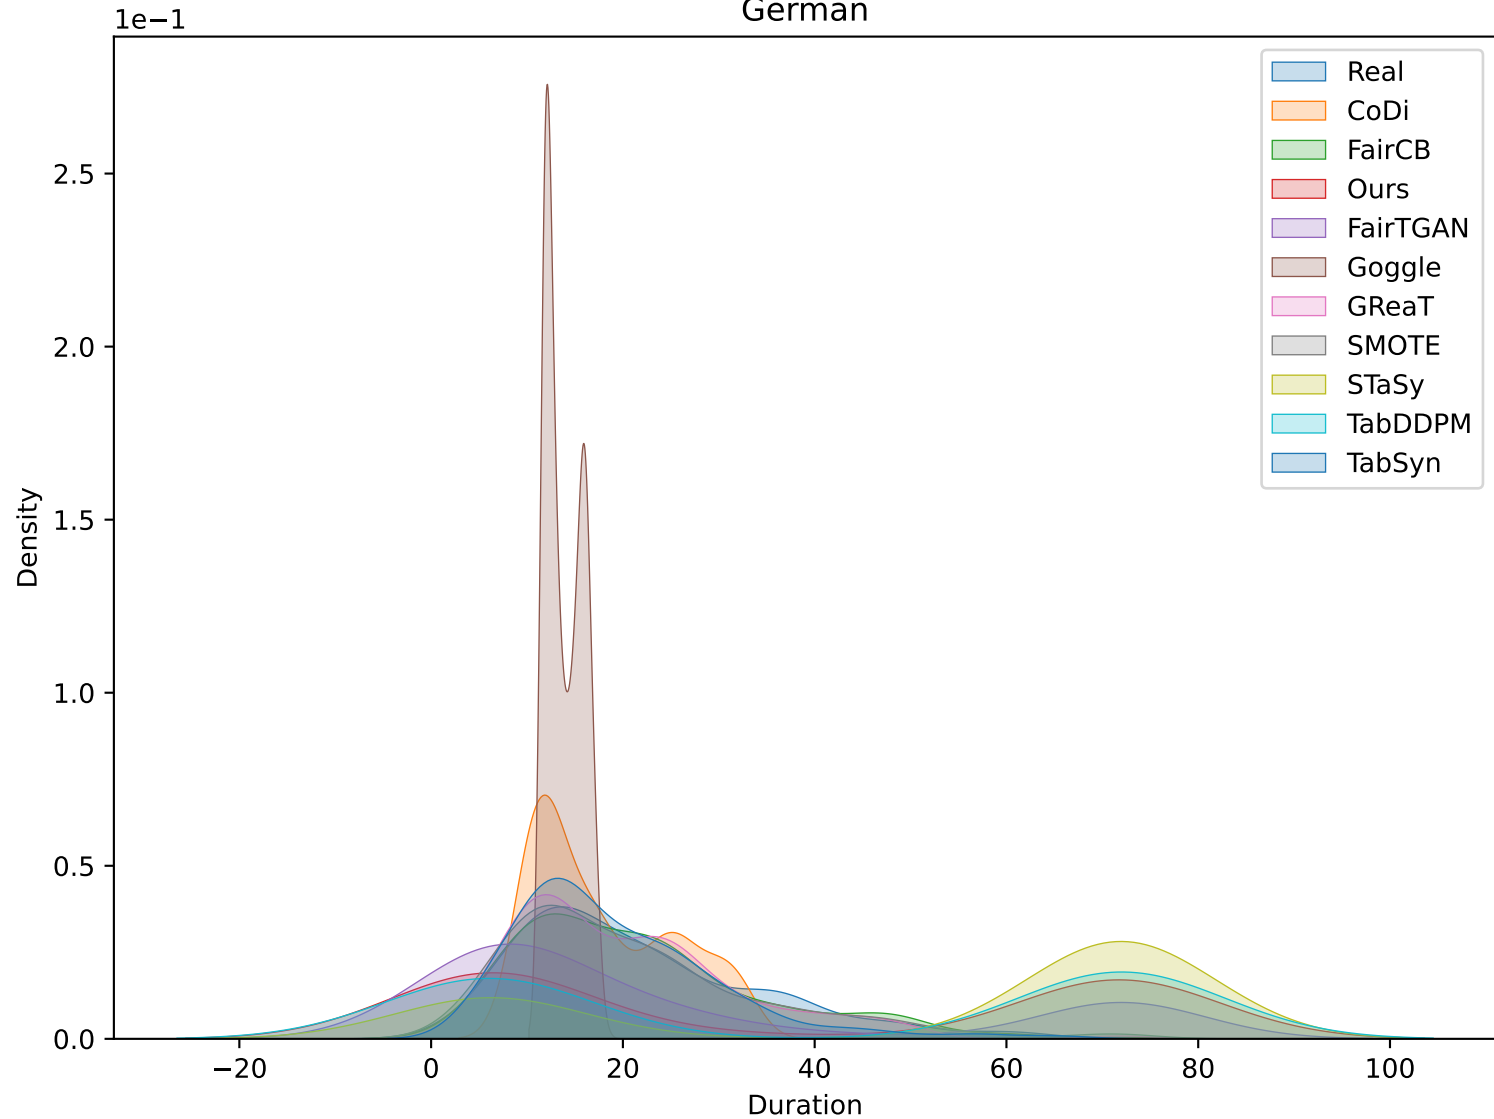

Supplement: supplementary_material [file attachment]

Bank

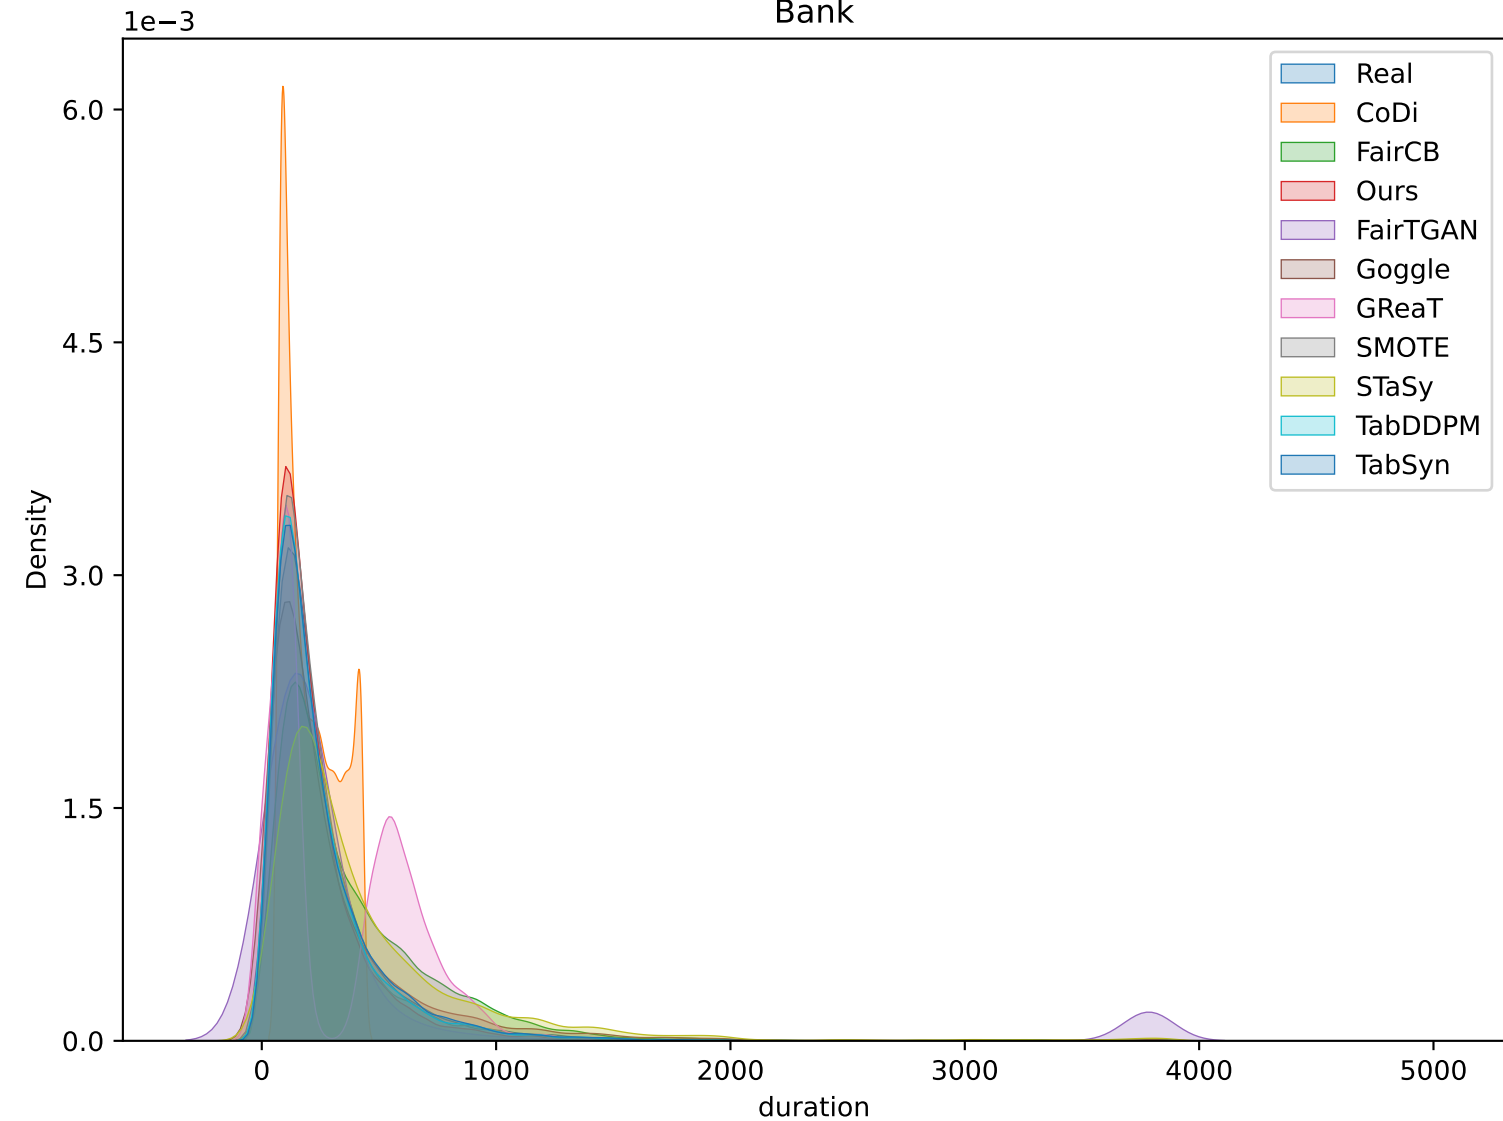

Supplement: supplementary_material [file attachment]

COMPAS

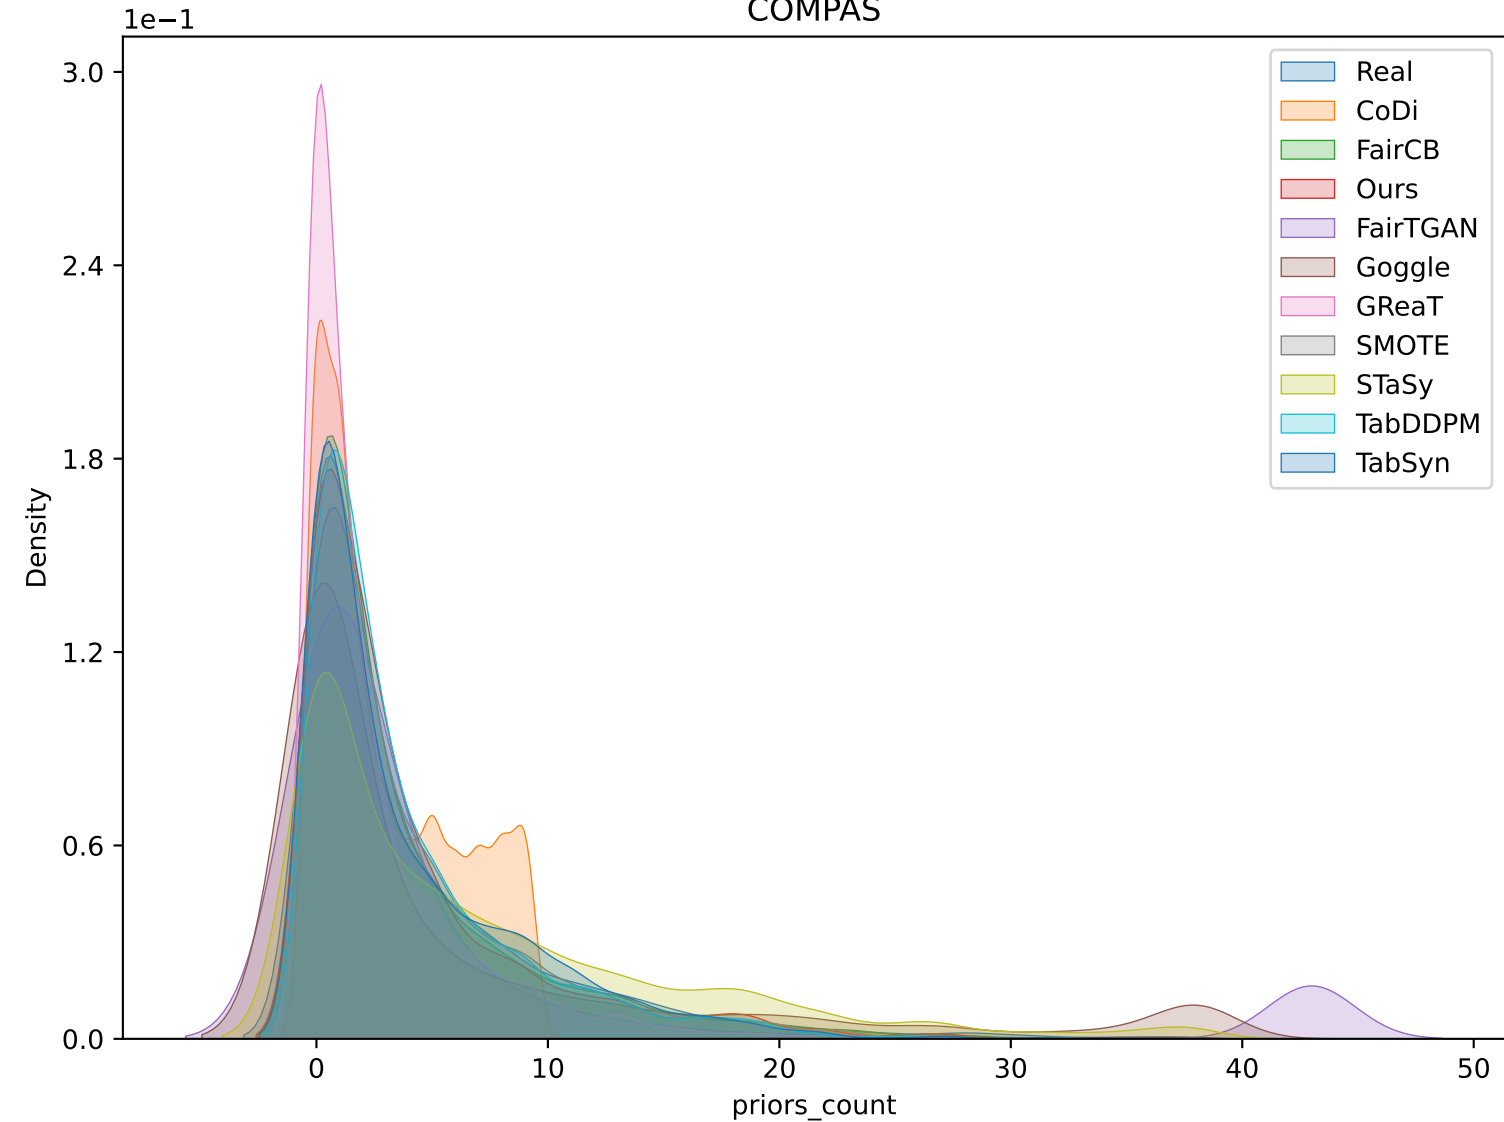

Supplement: supplementary_material [file attachment]

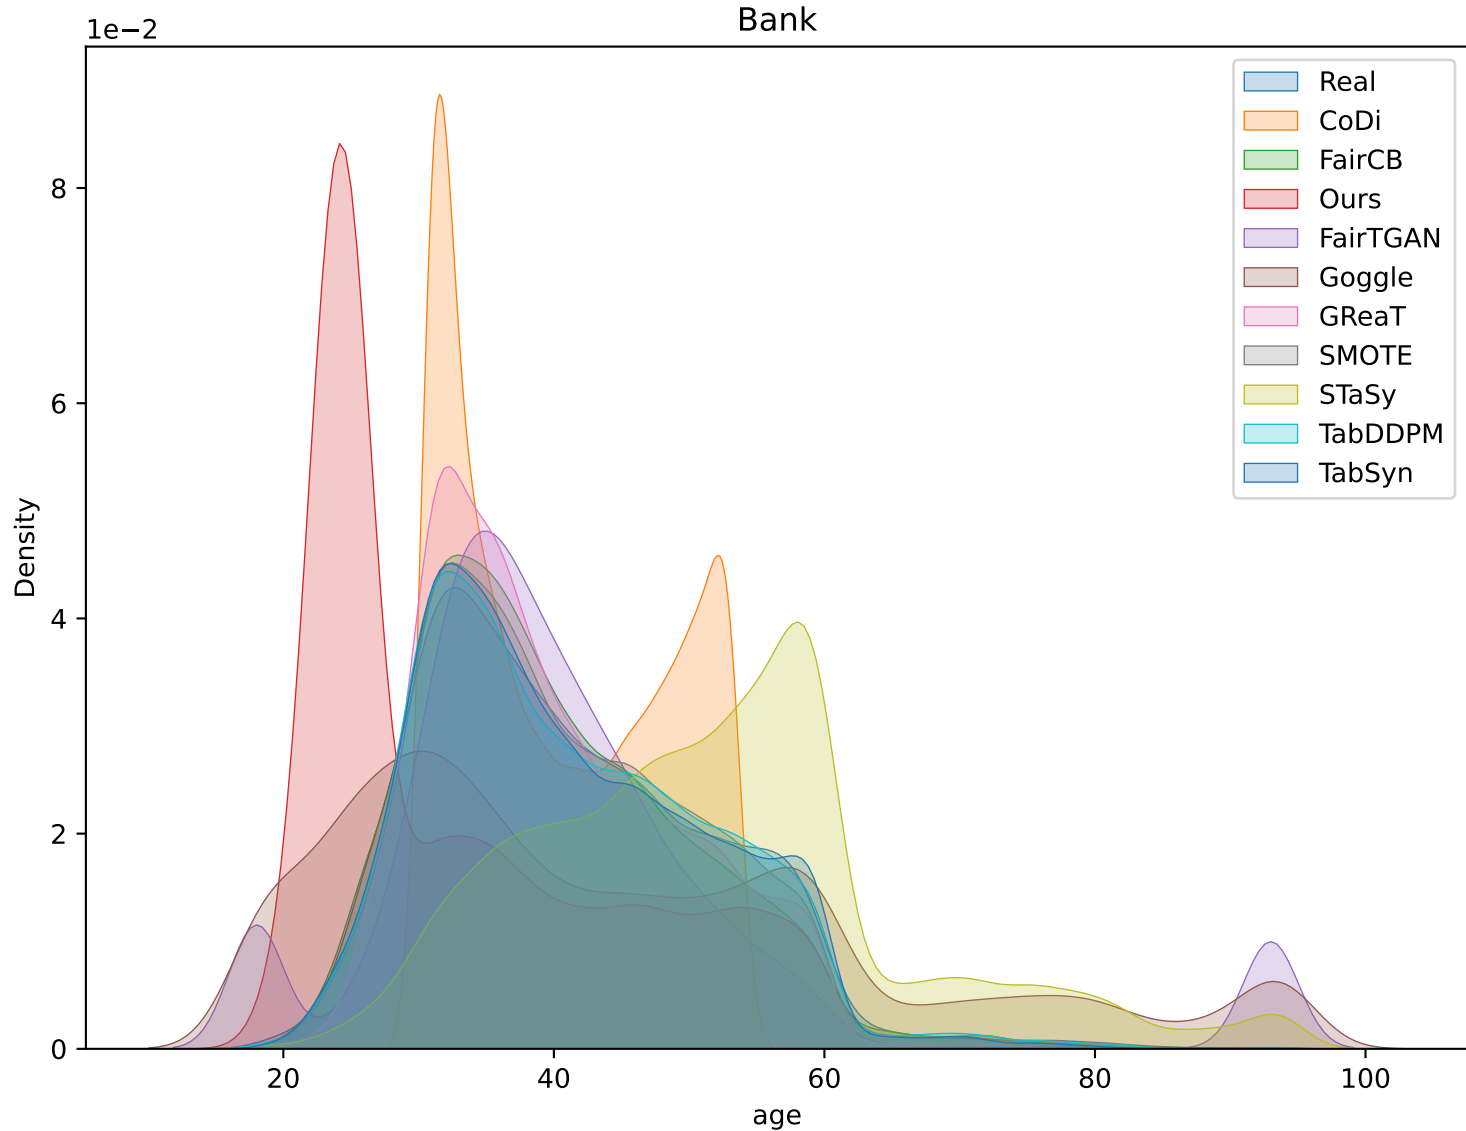

Supplement: supplementary_material [file attachment]

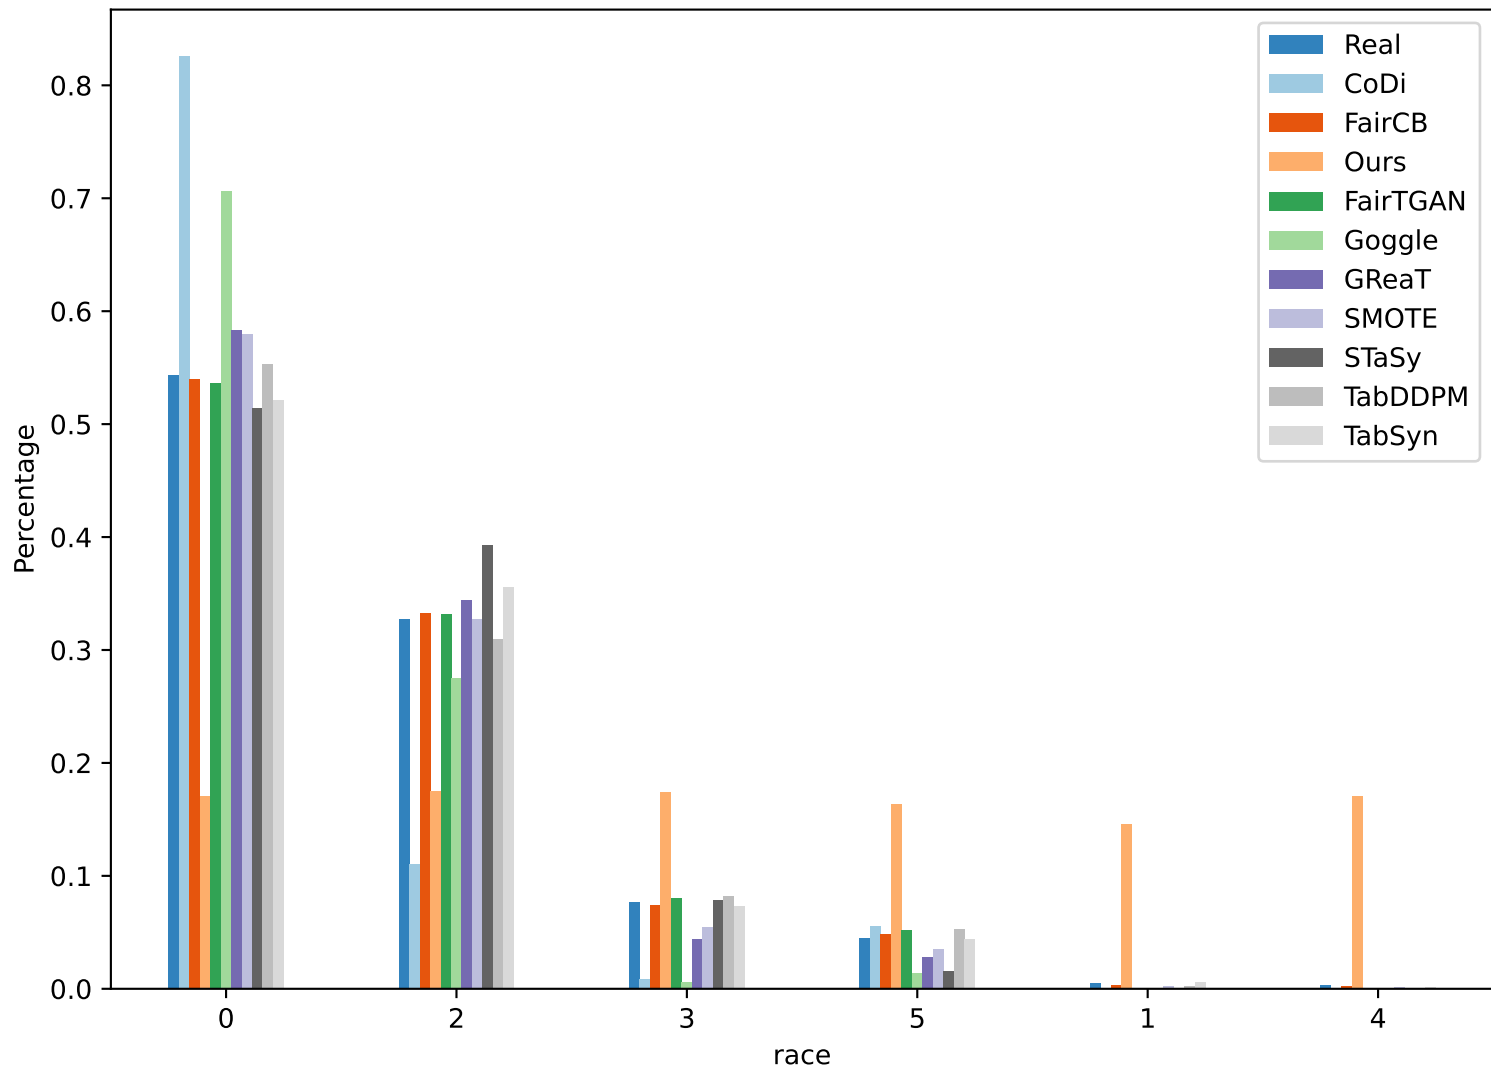

Supplement: supplementary_material [file attachment]

Heatmap of Contingency Tables for Real and Synthetic Data

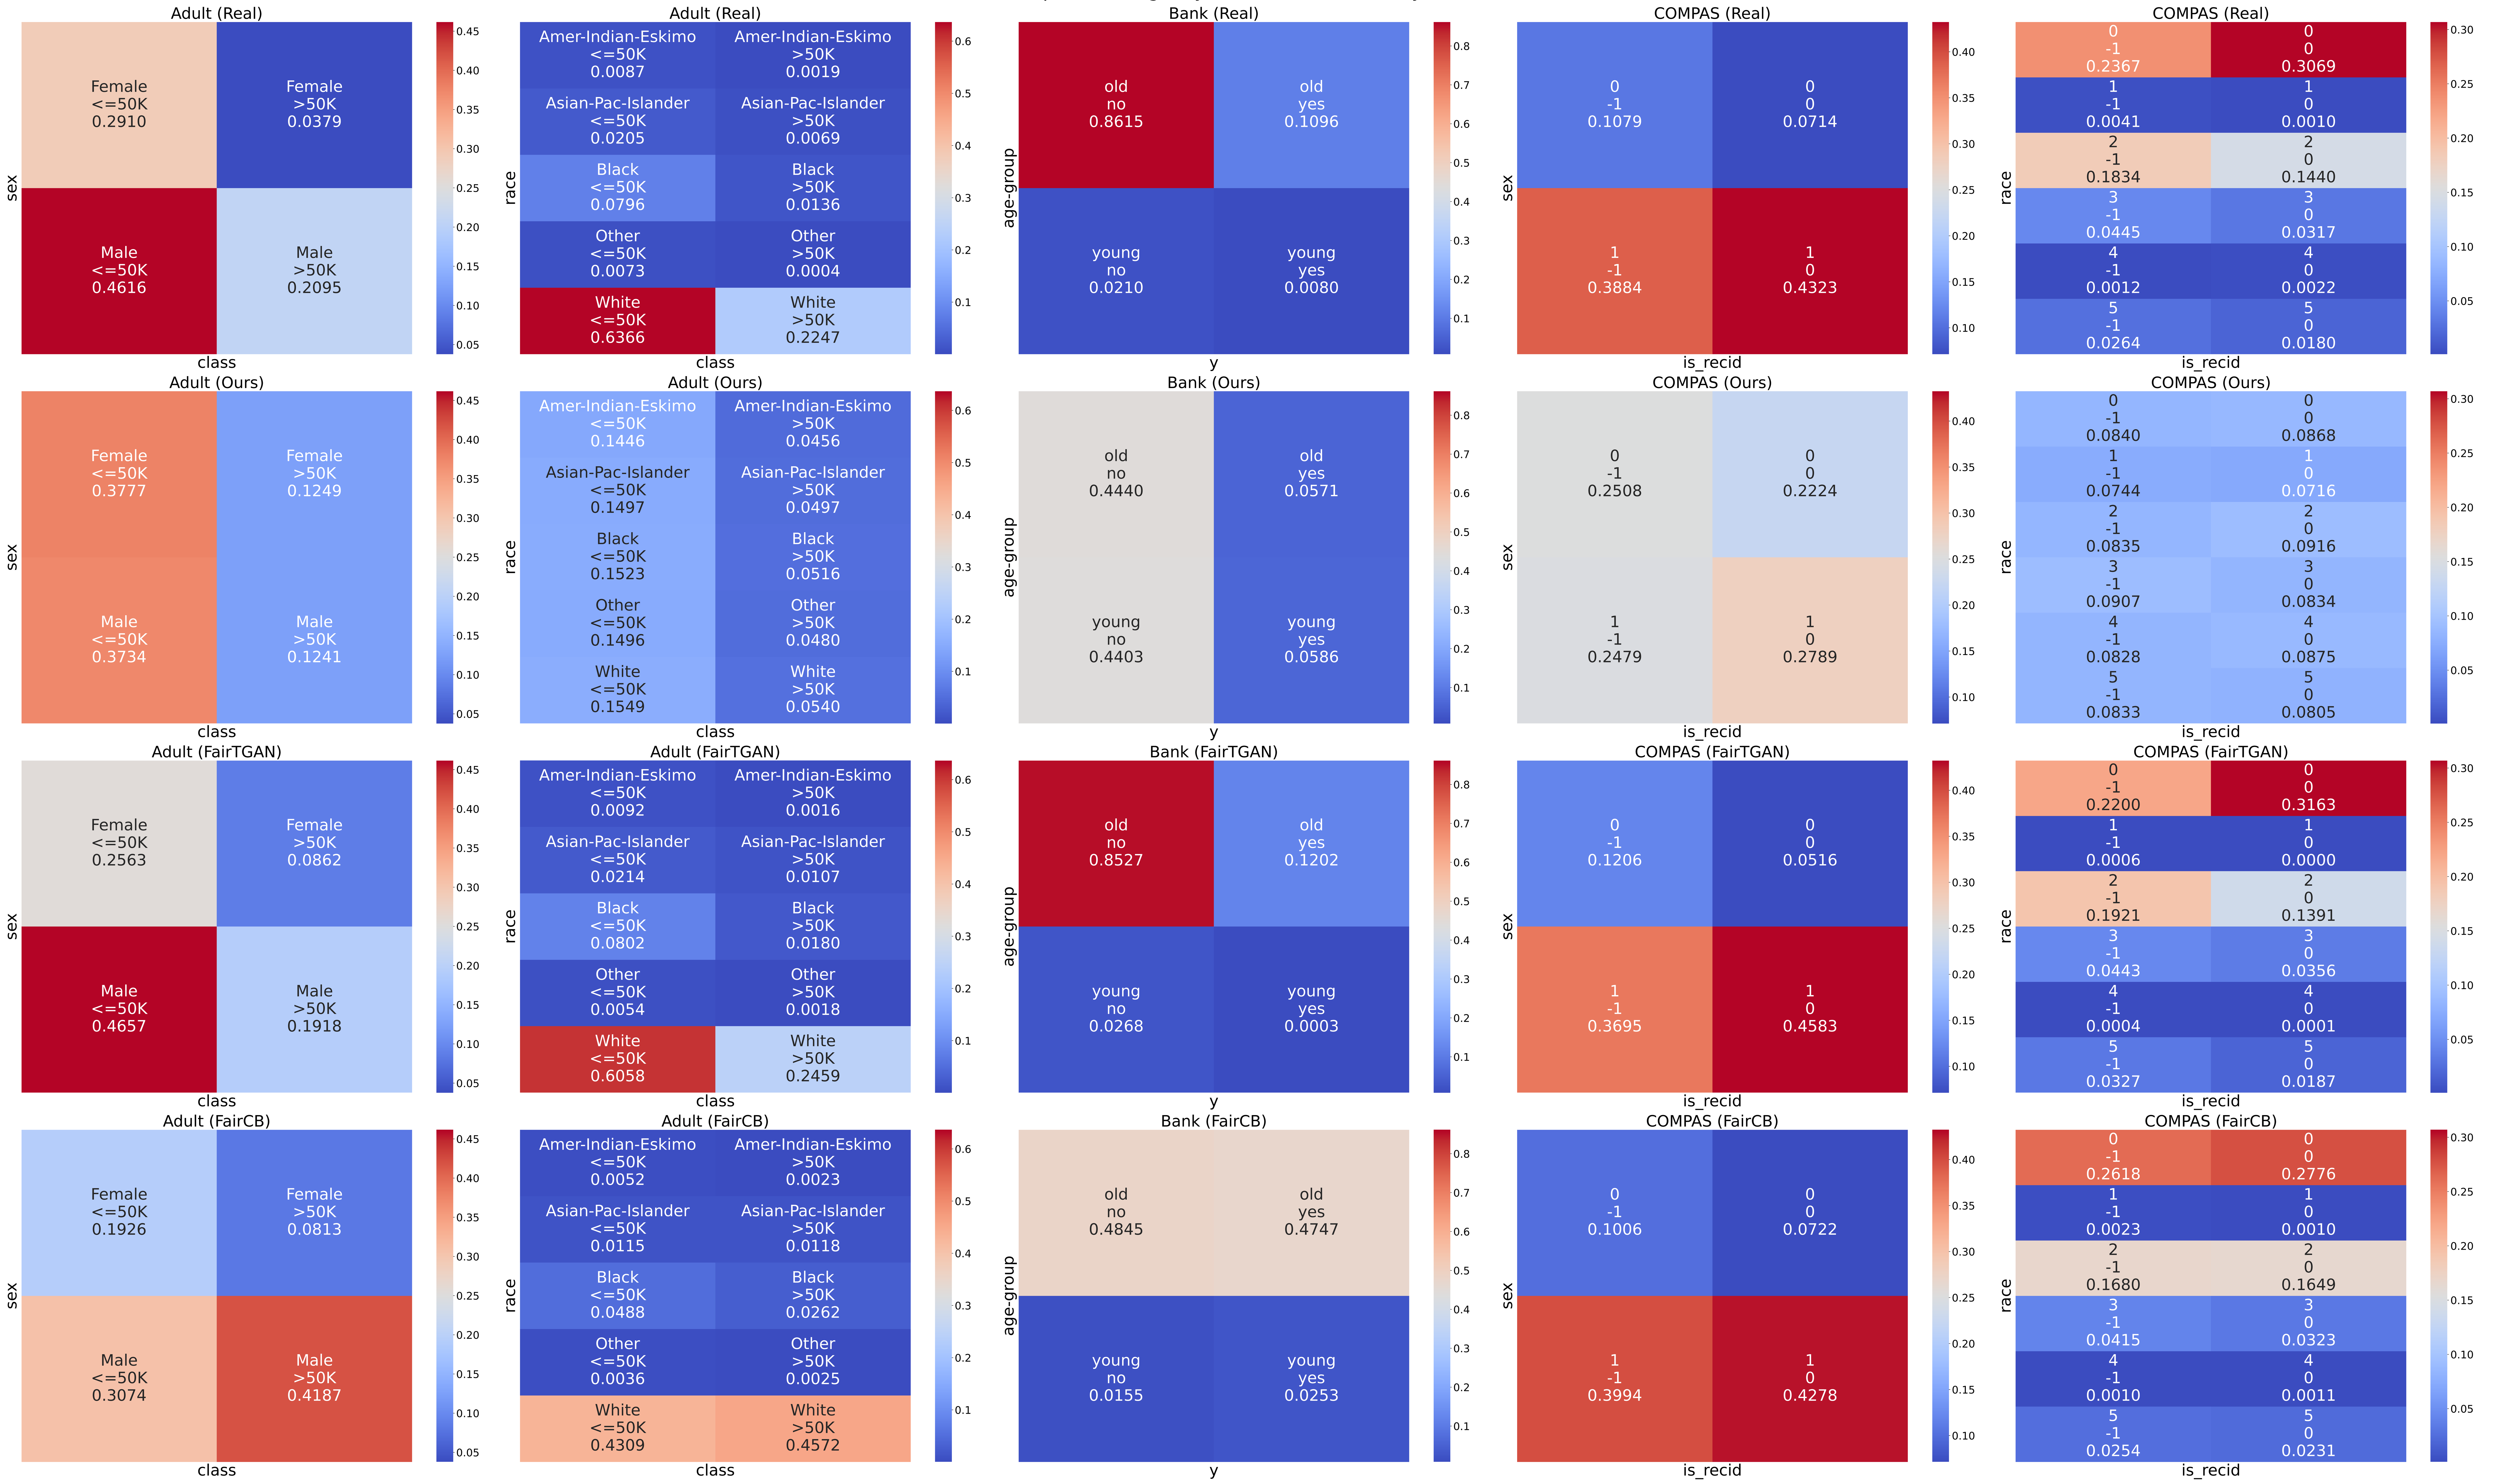

Supplement: supplementary_material [file attachment]

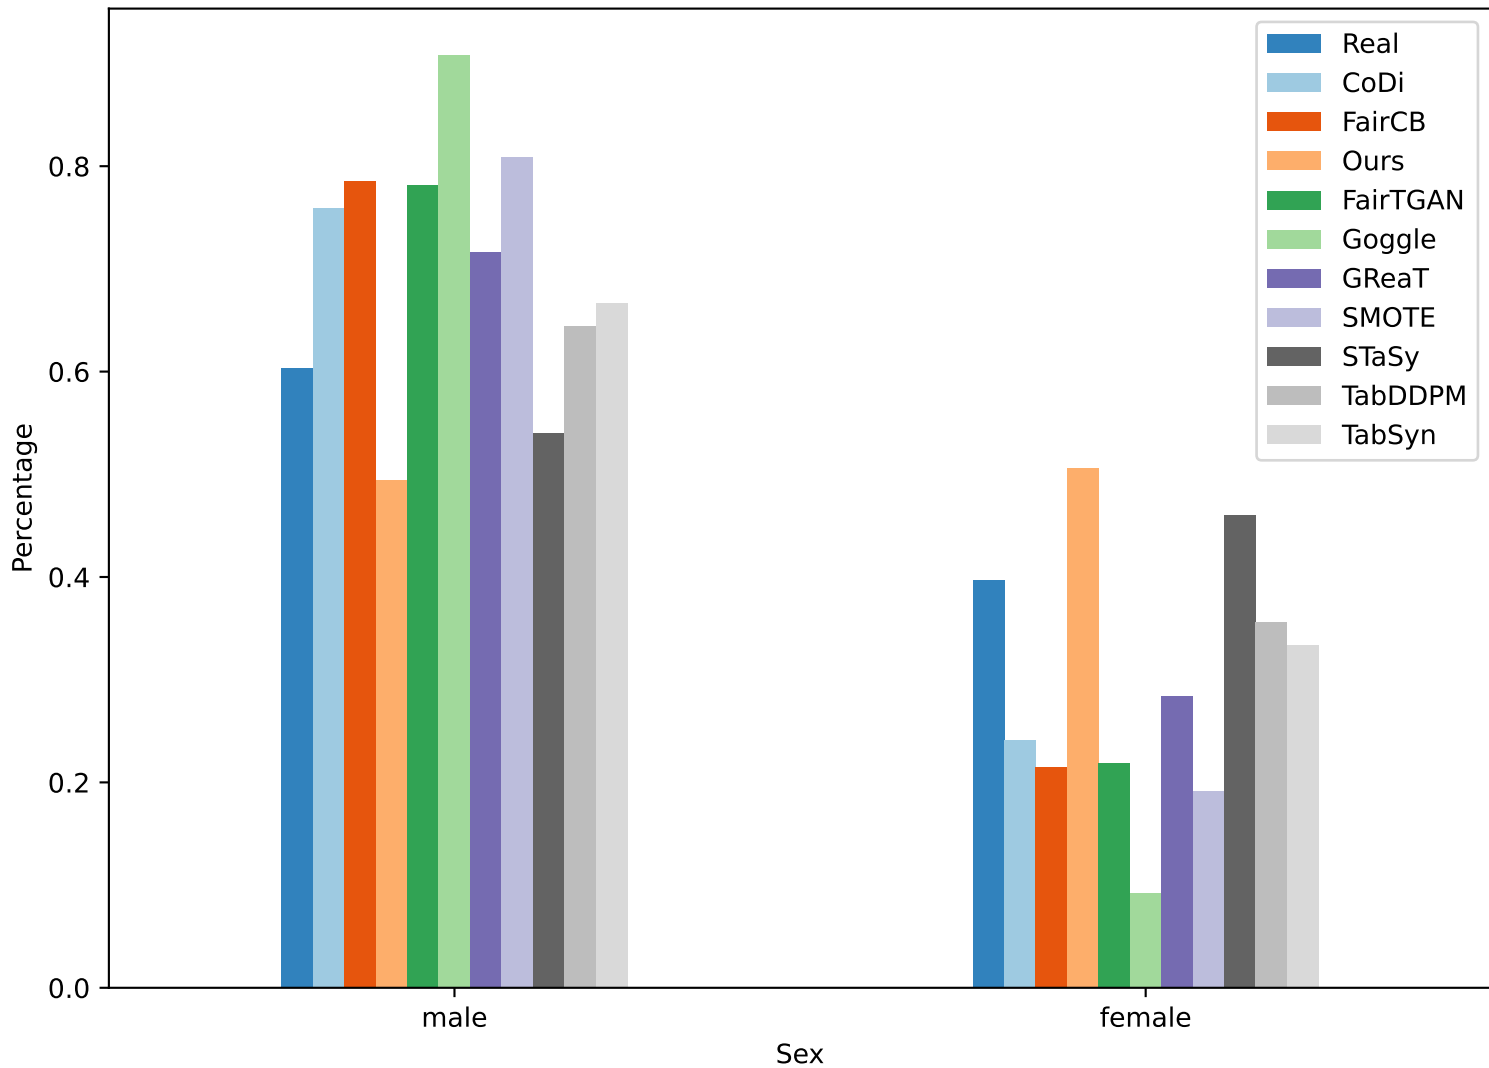

Supplement: supplementary_material [file attachment]

# (Real) sensitive attributes vs target label on the Bank dataset

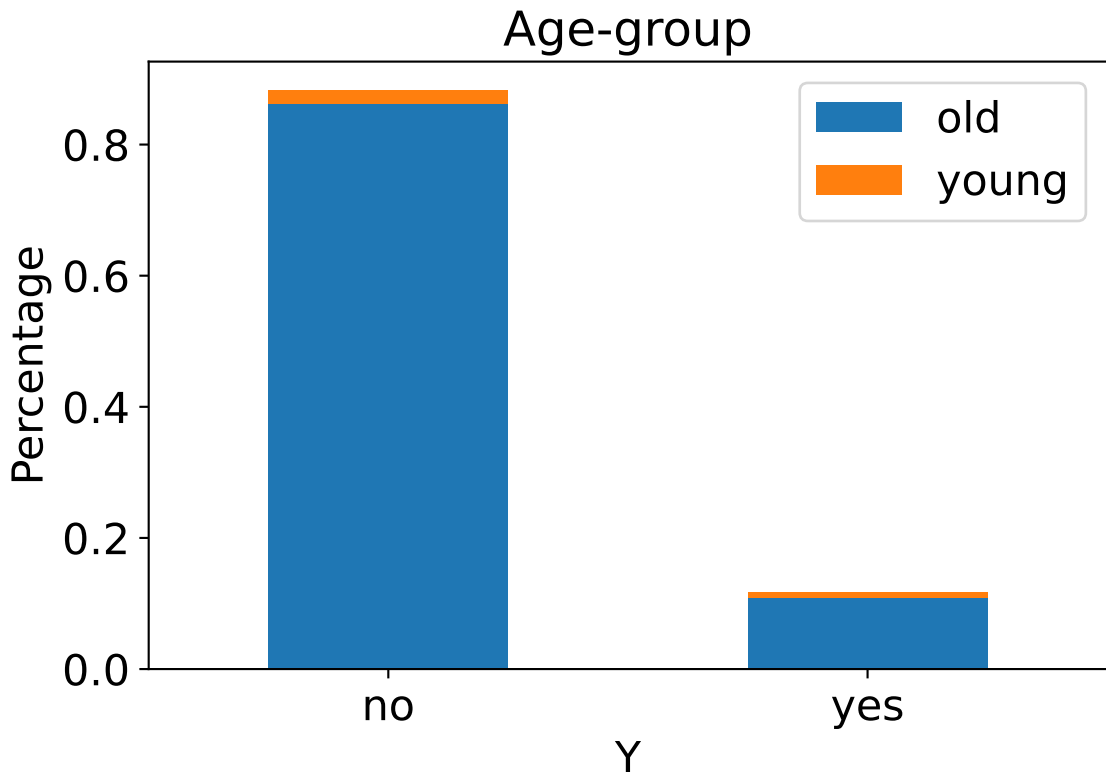

Supplement: supplementary_material [file attachment]

# (FairCB) sensitive attributes vs target label on the Adult dataset

## Sex

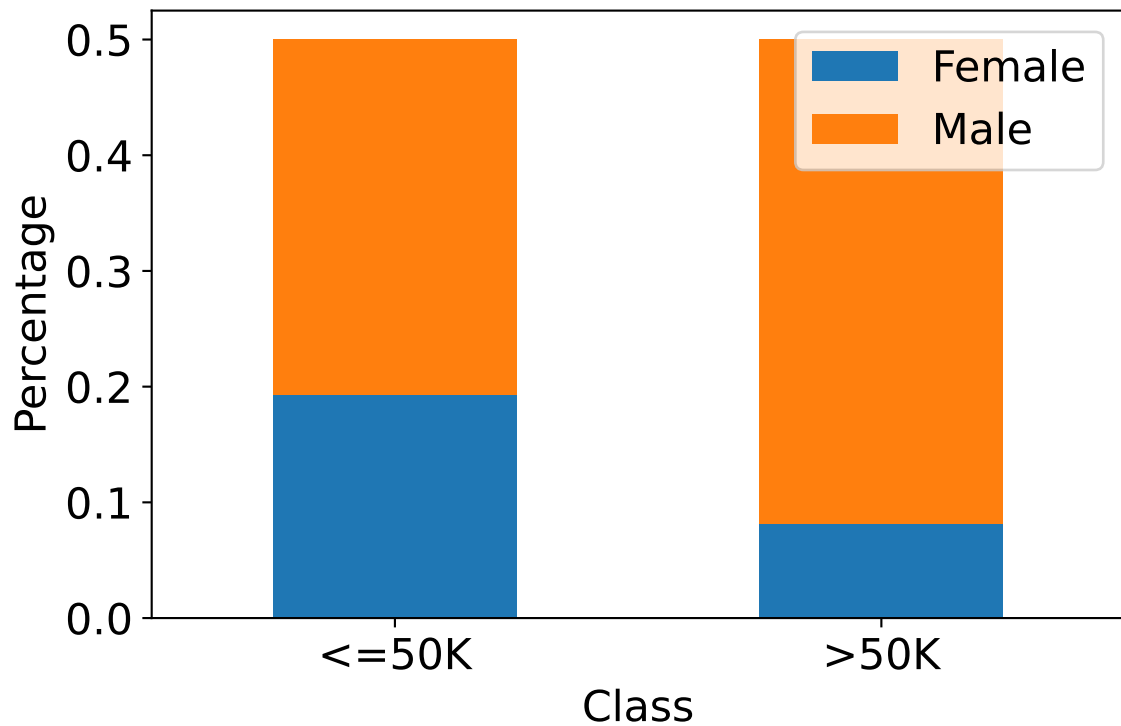

## Race

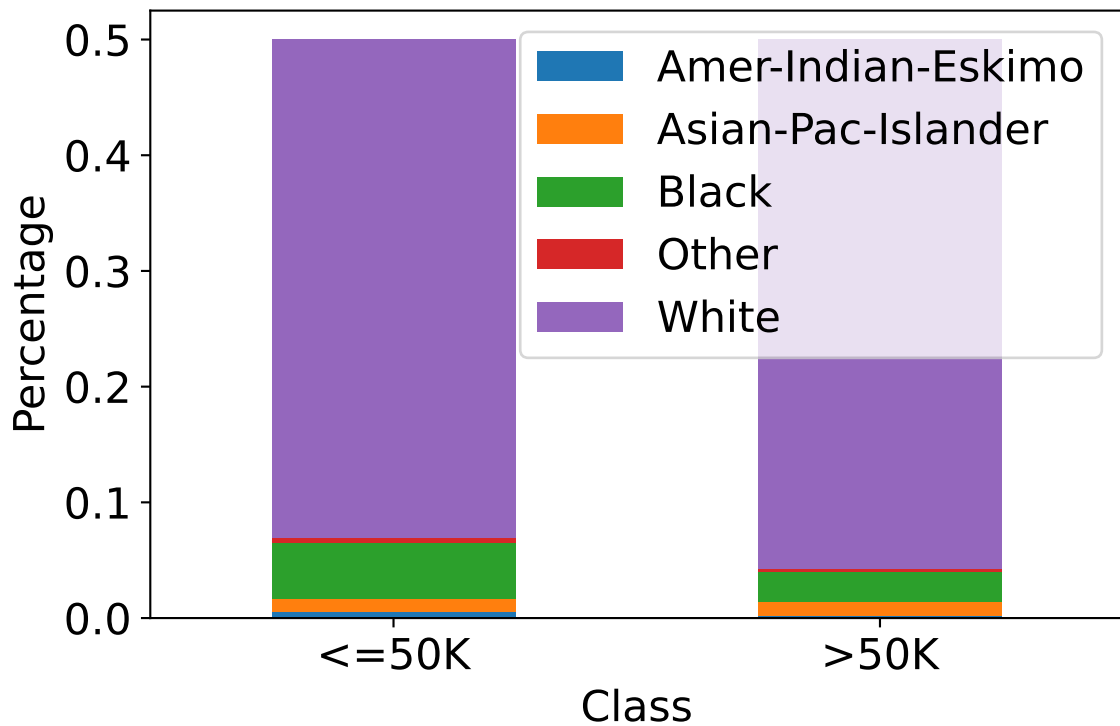

Supplement: supplementary_material [file attachment]

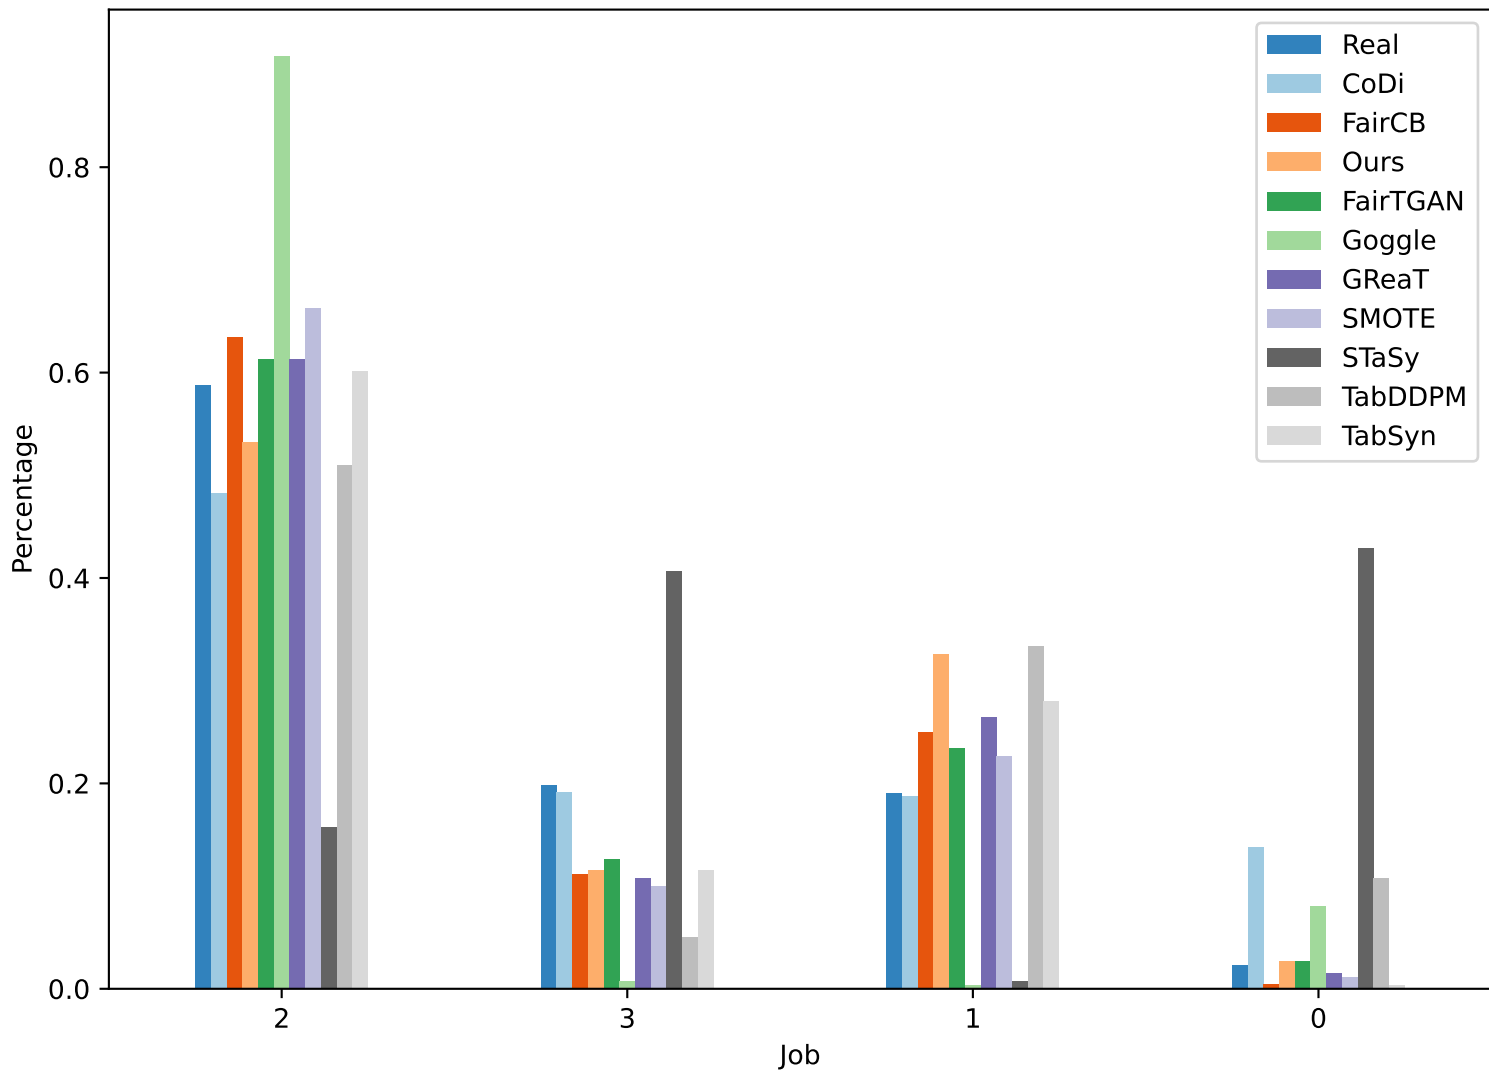

Supplement: supplementary_material [file attachment]

(Real) sensitive attributes vs target label  
on the COMPAS dataset

Sex

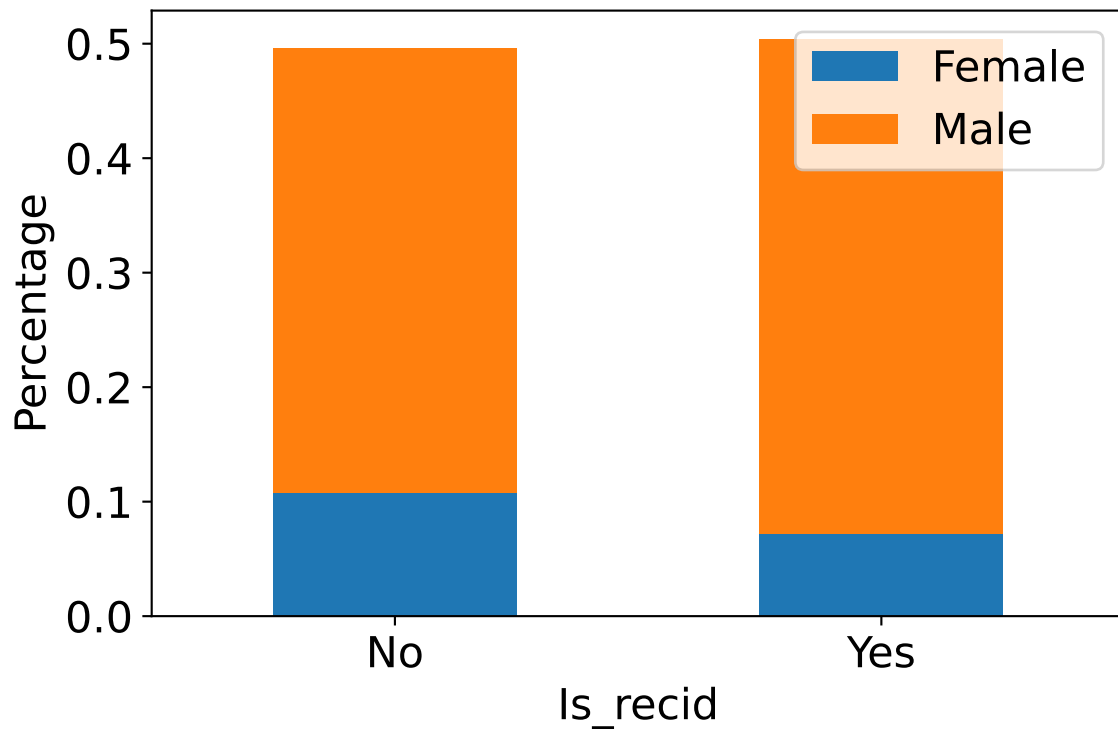

Race

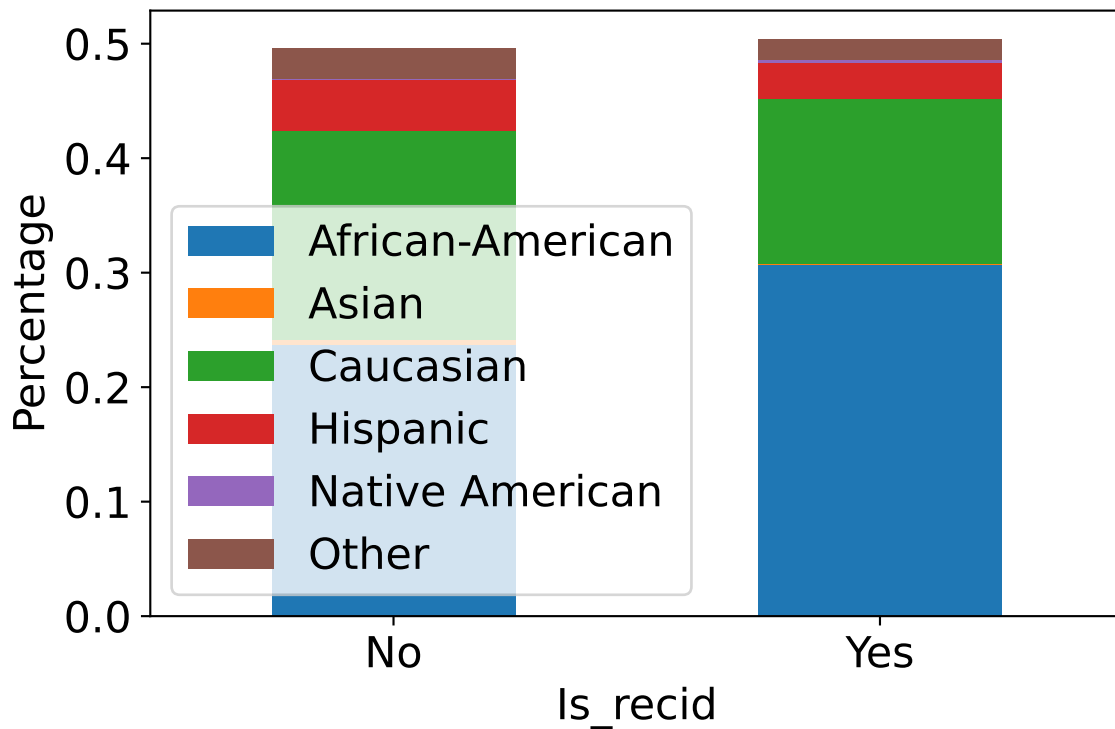

Supplement: supplementary_material [file attachment]

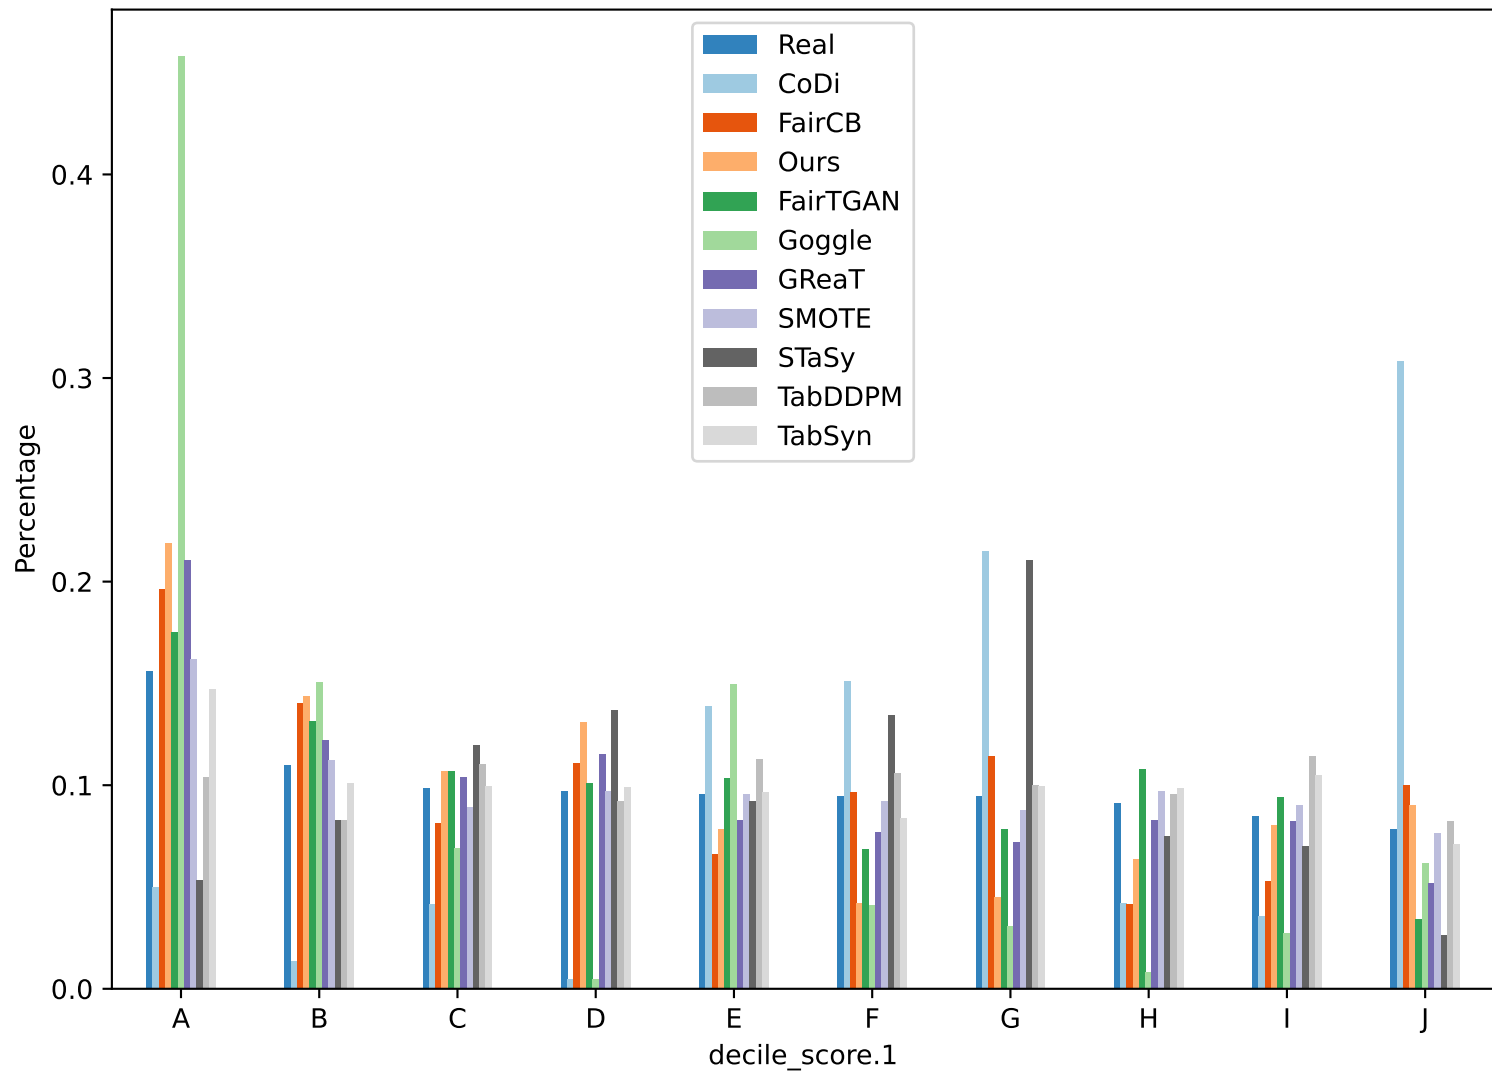

Supplement: supplementary_material [file attachment]

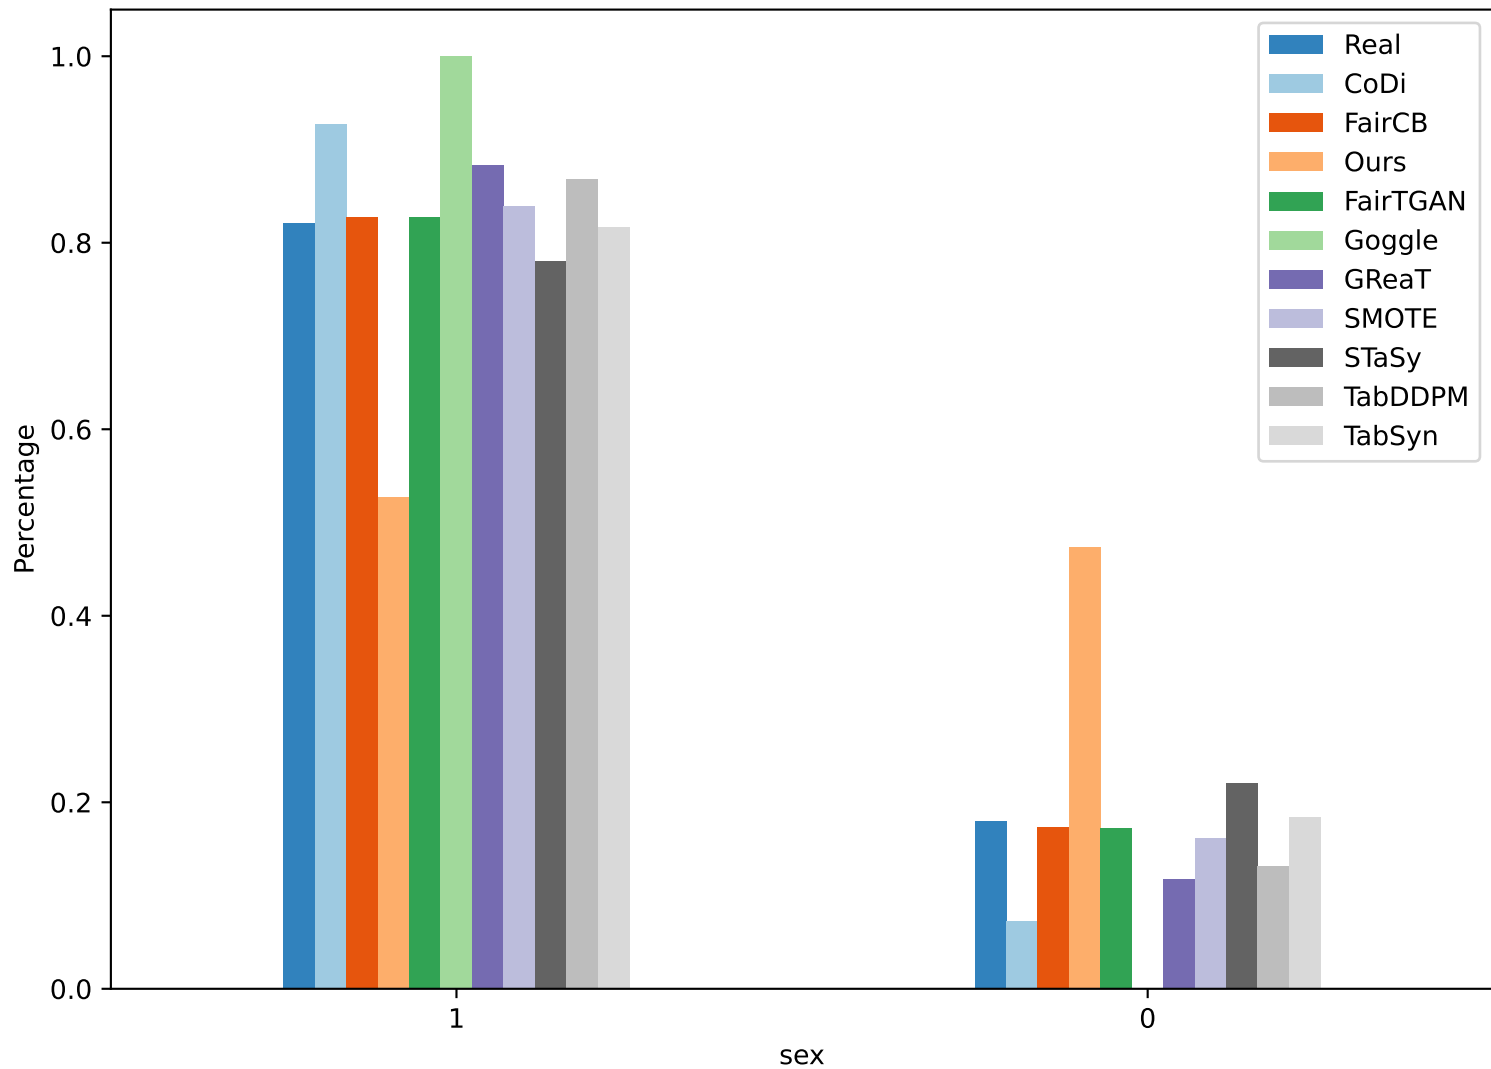

Supplement: supplementary_material [file attachment]

# Sensitive Attribute Distribution in Real and Synthetic Data with Our Method

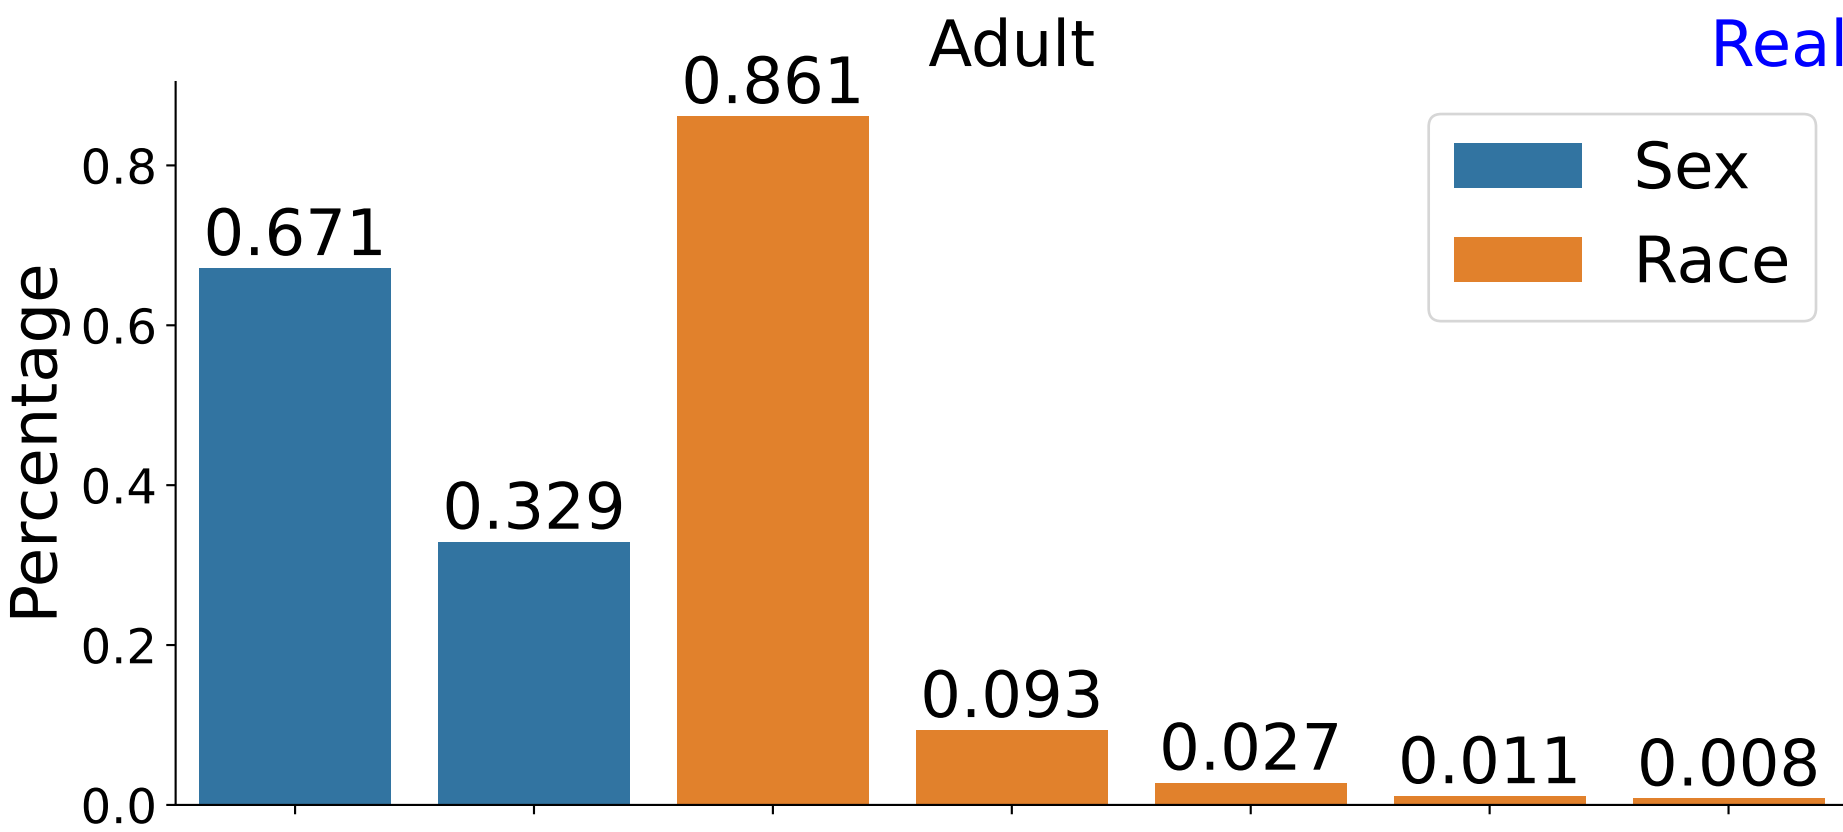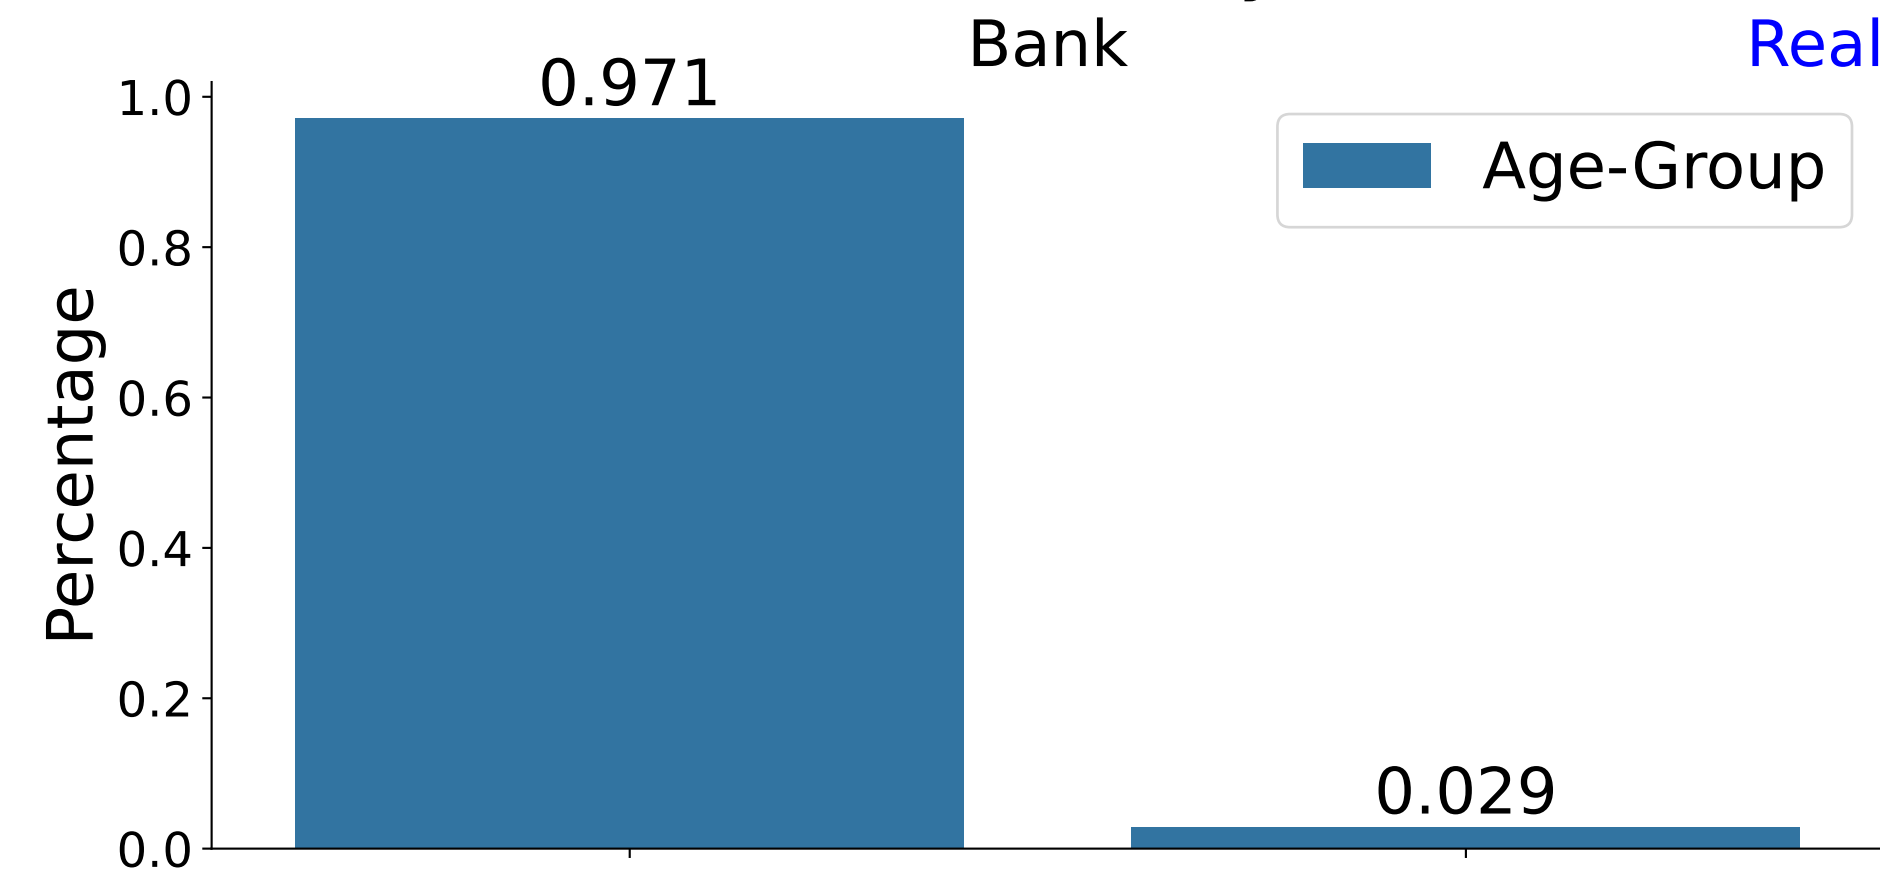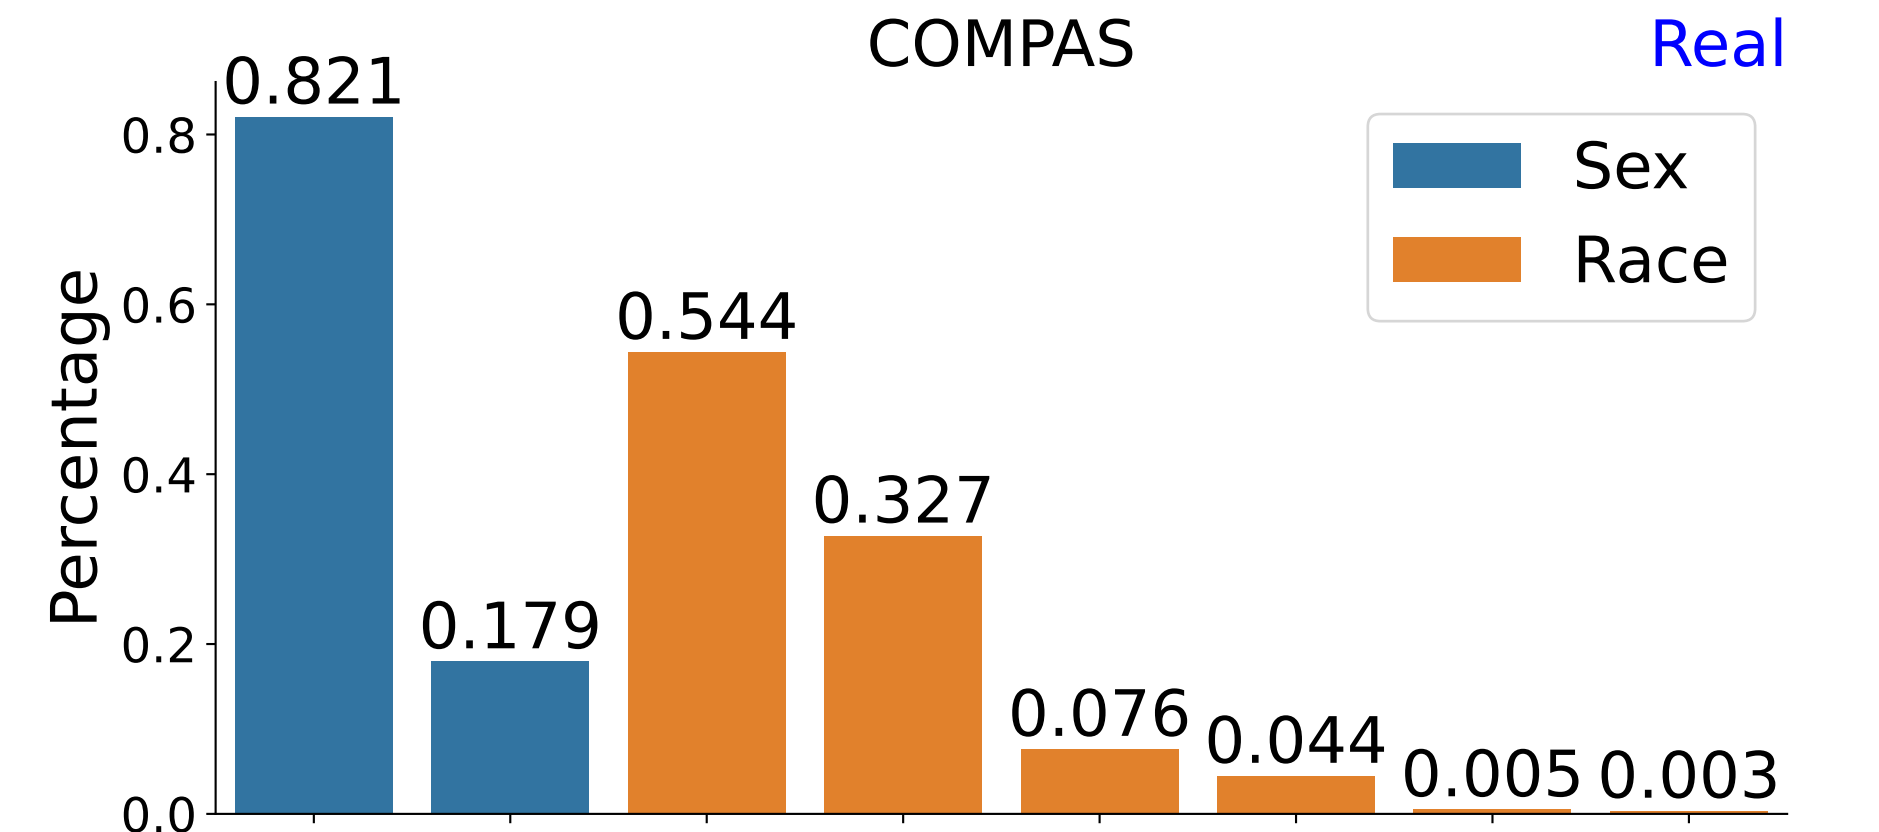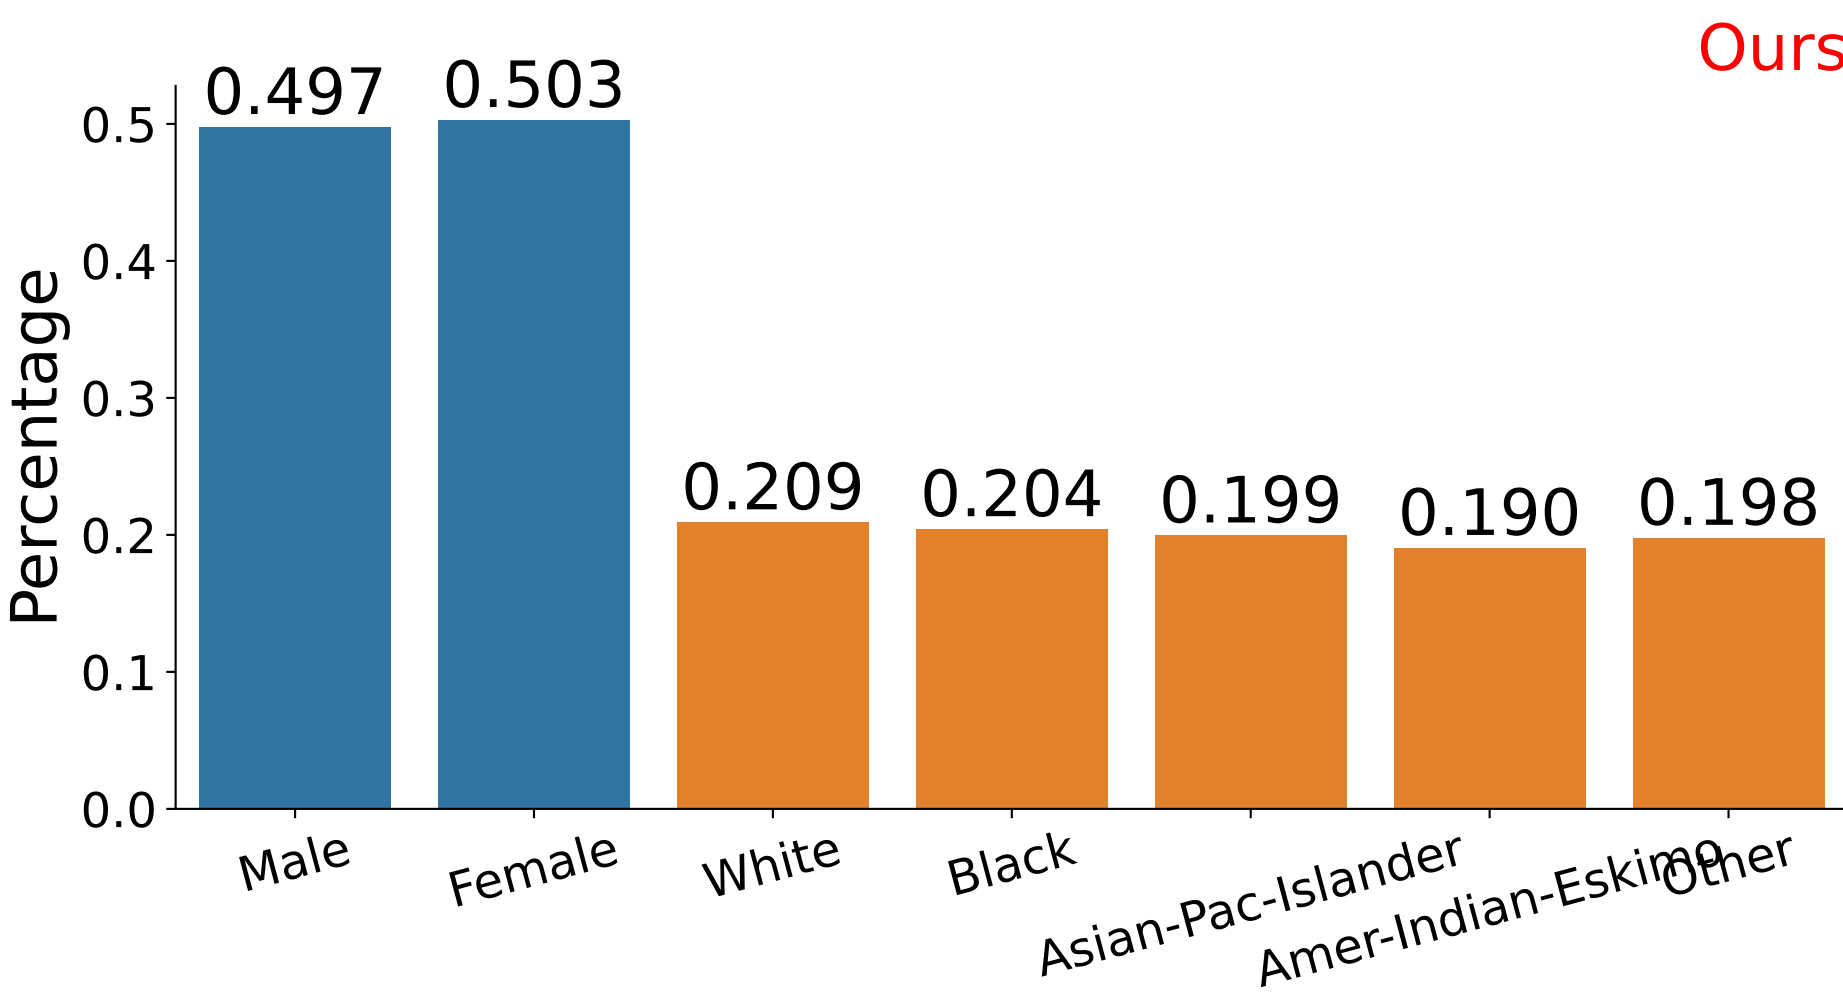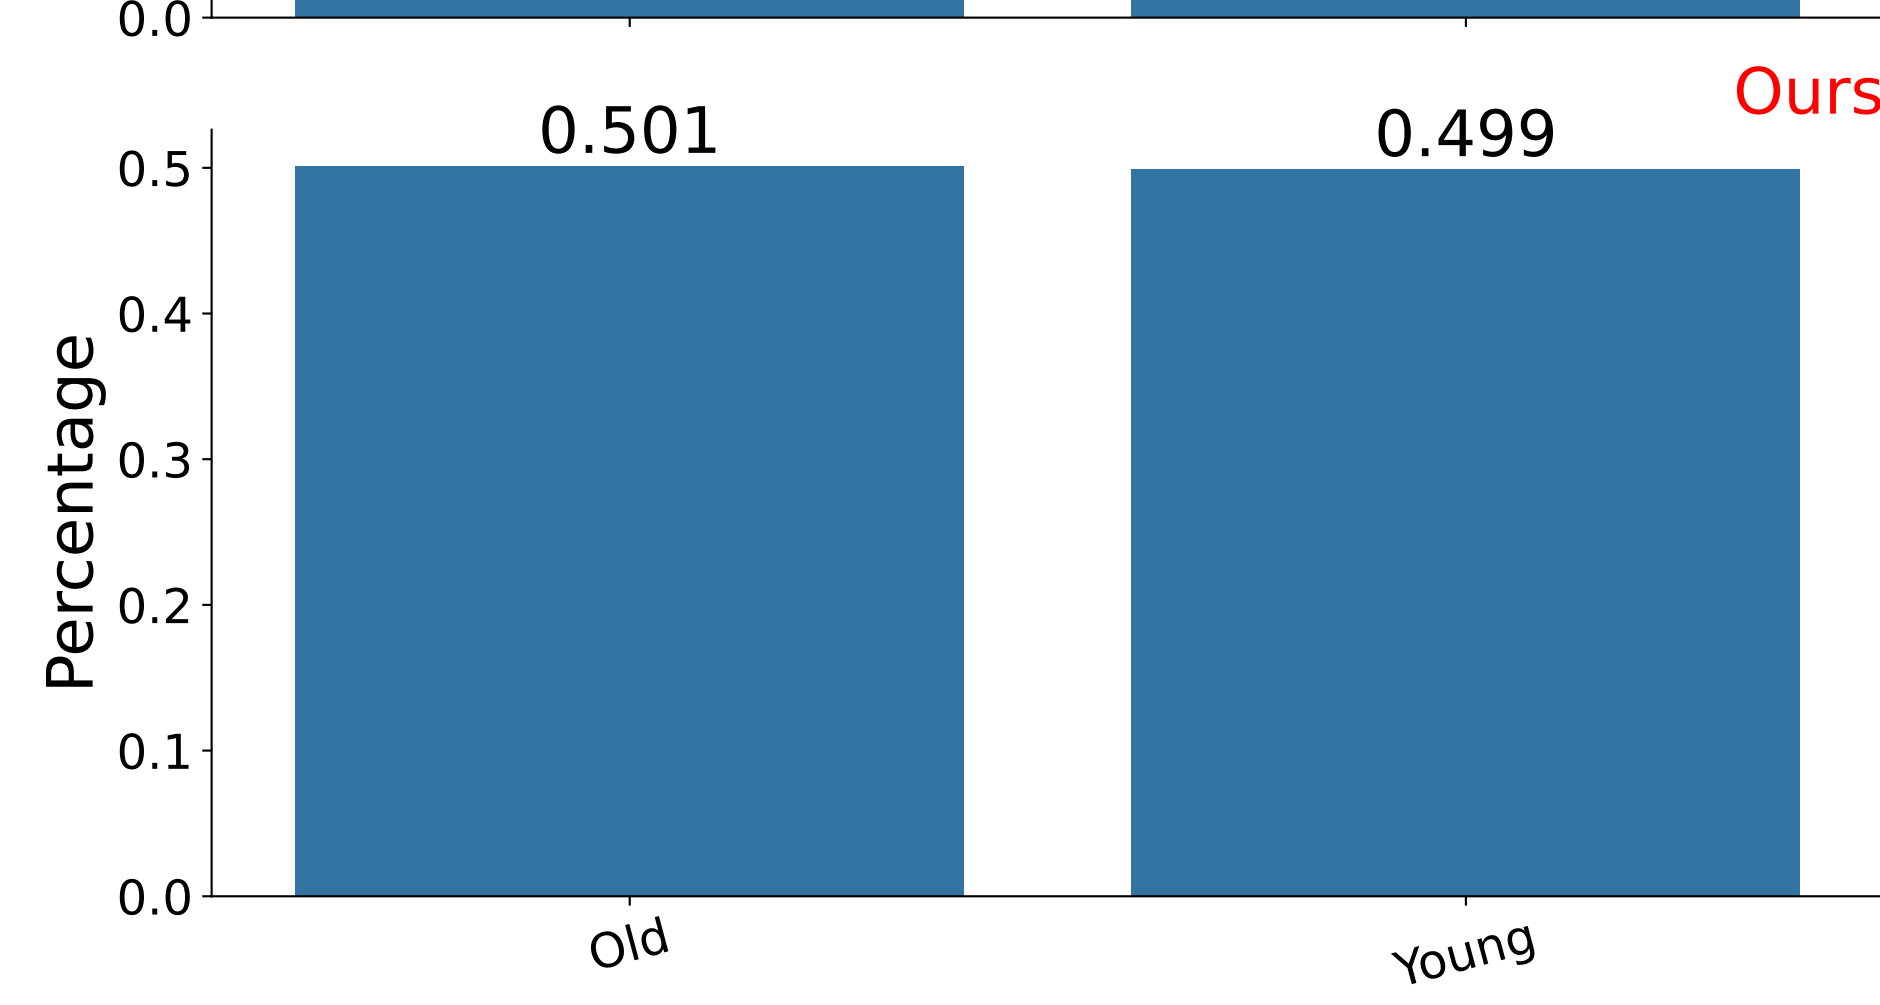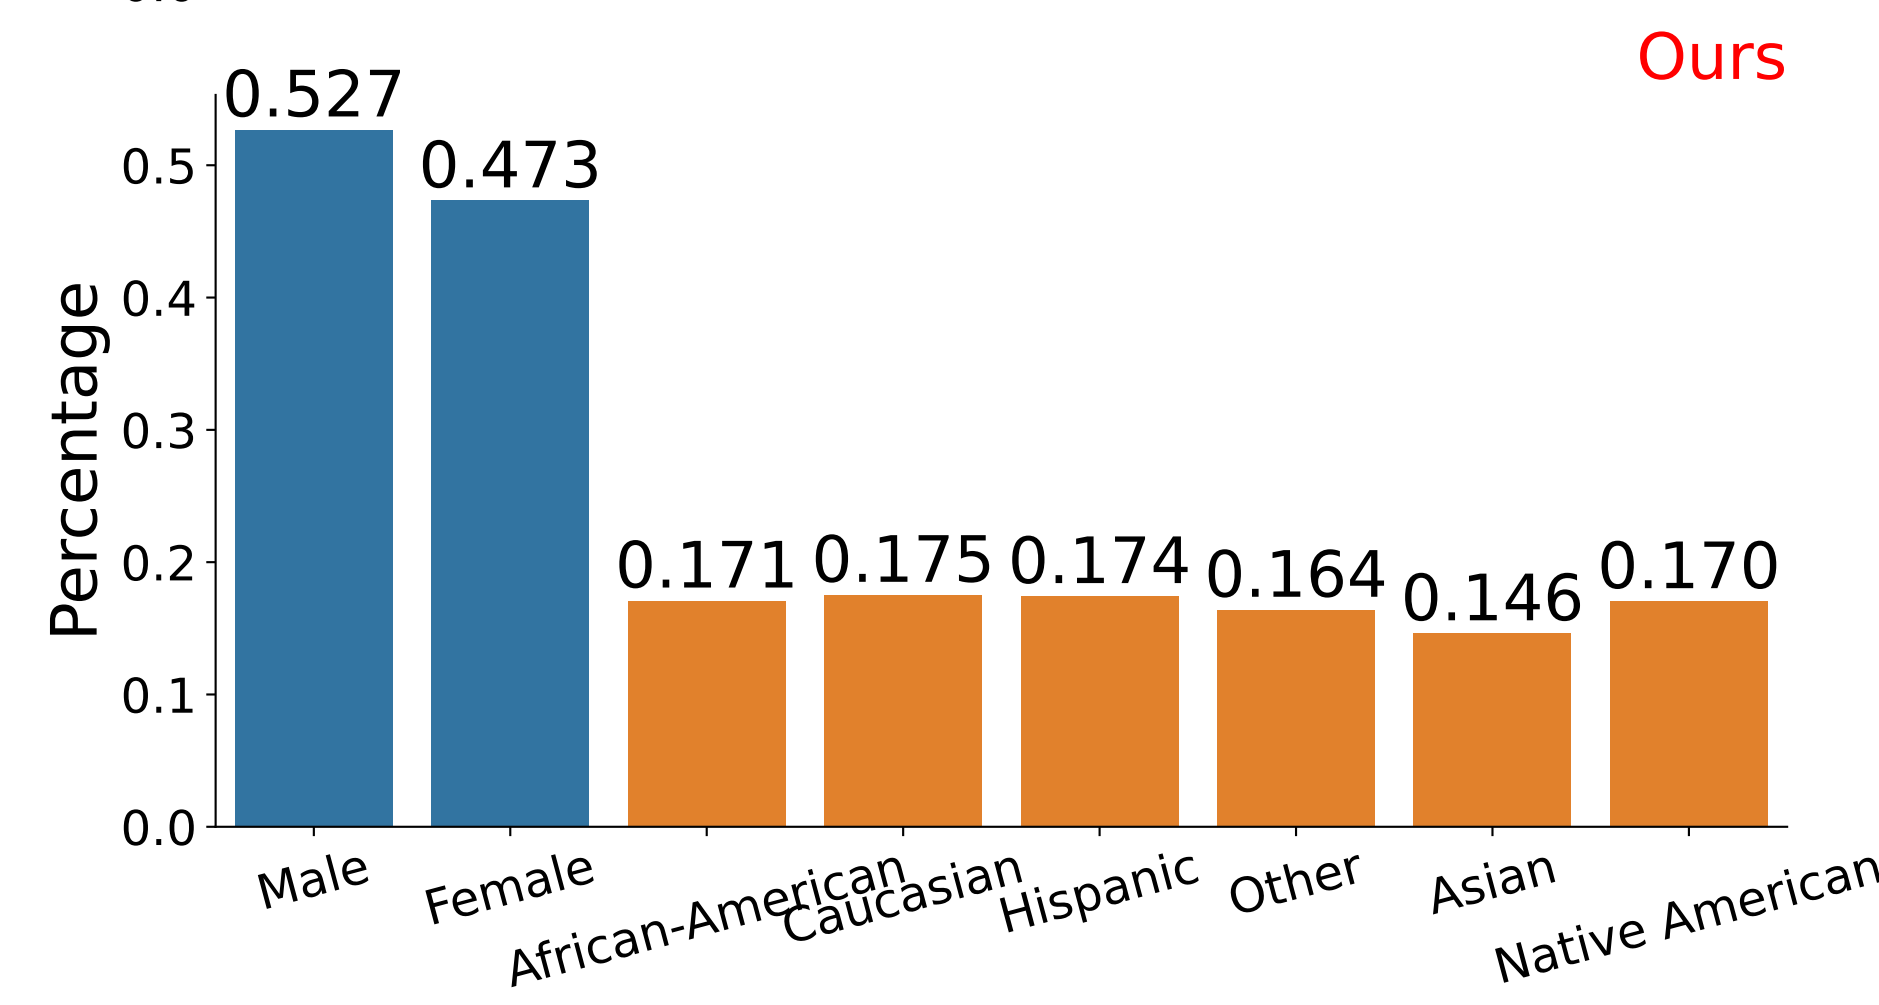

Supplement: supplementary_material [file attachment]

Adult

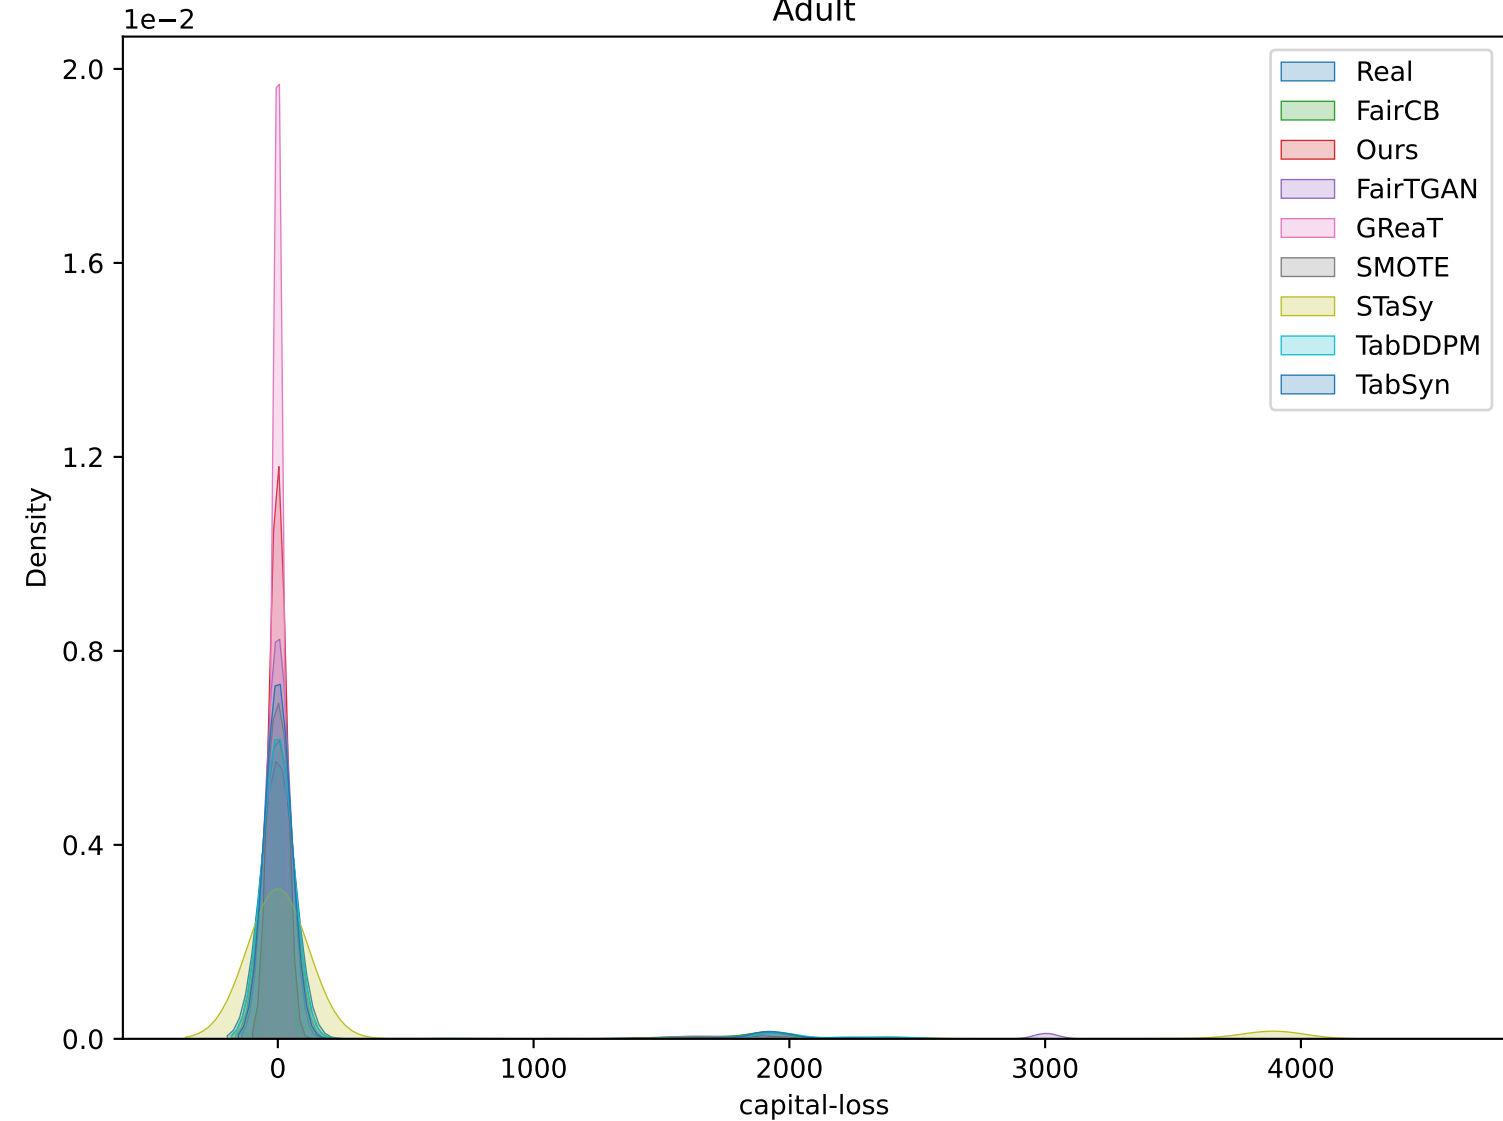

Supplement: supplementary_material [file attachment]

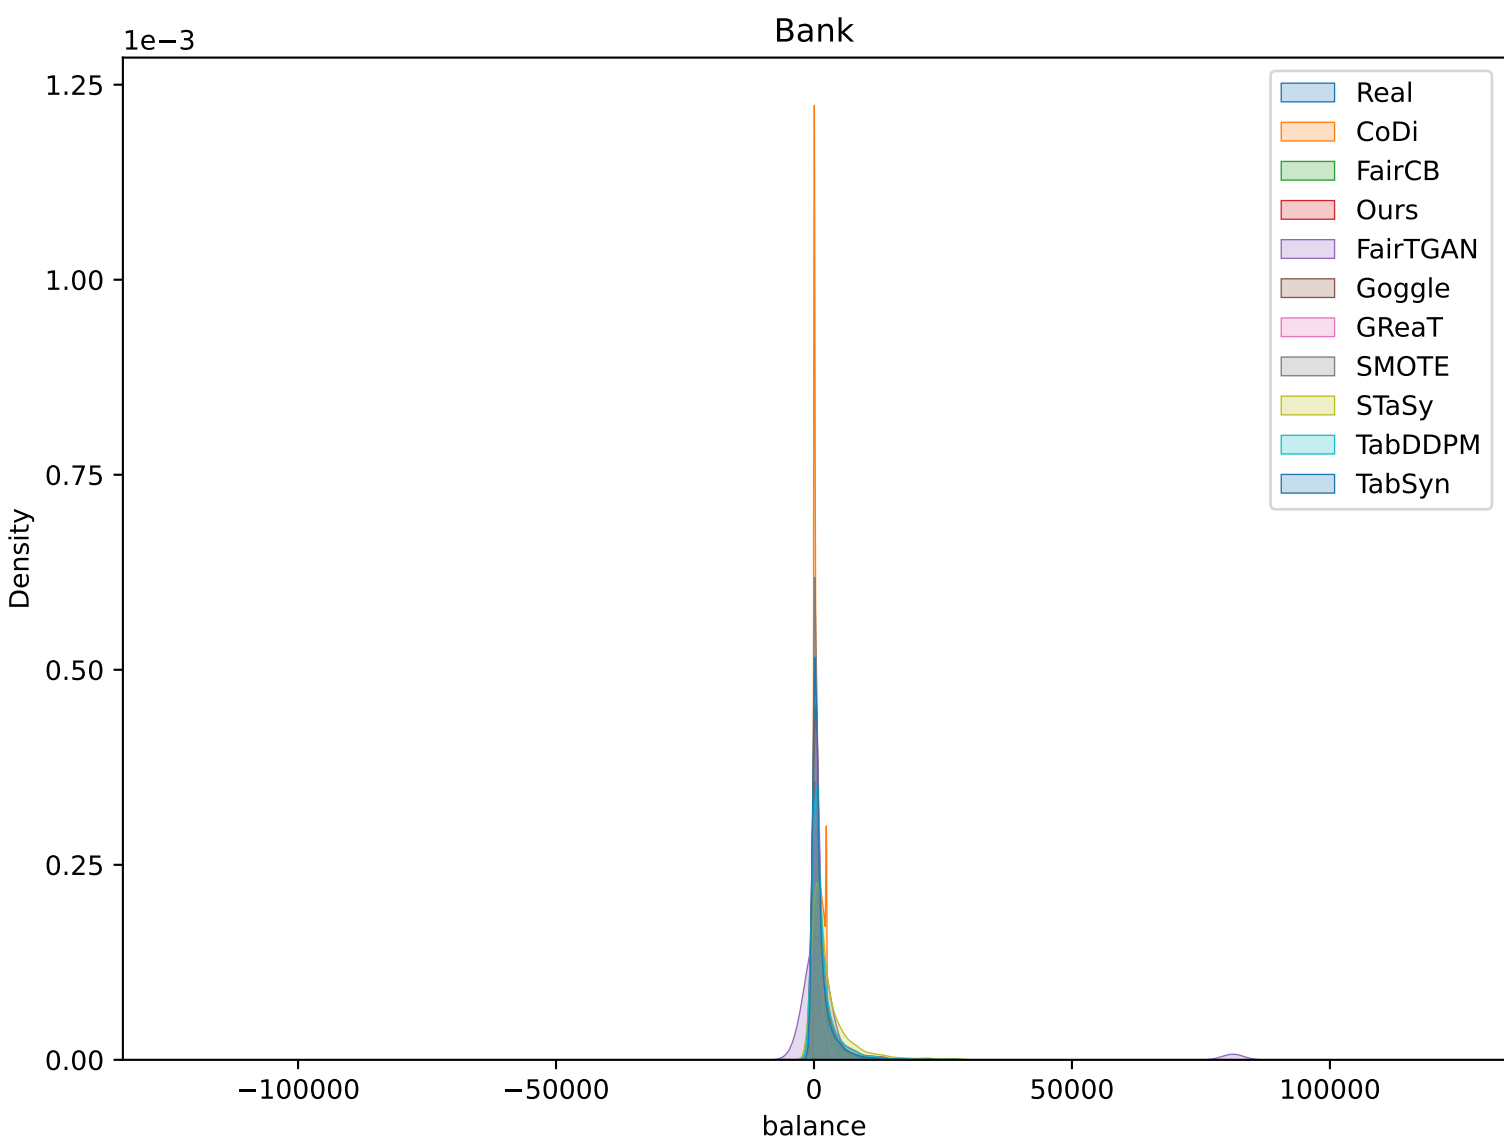

Supplement: supplementary_material [file attachment]

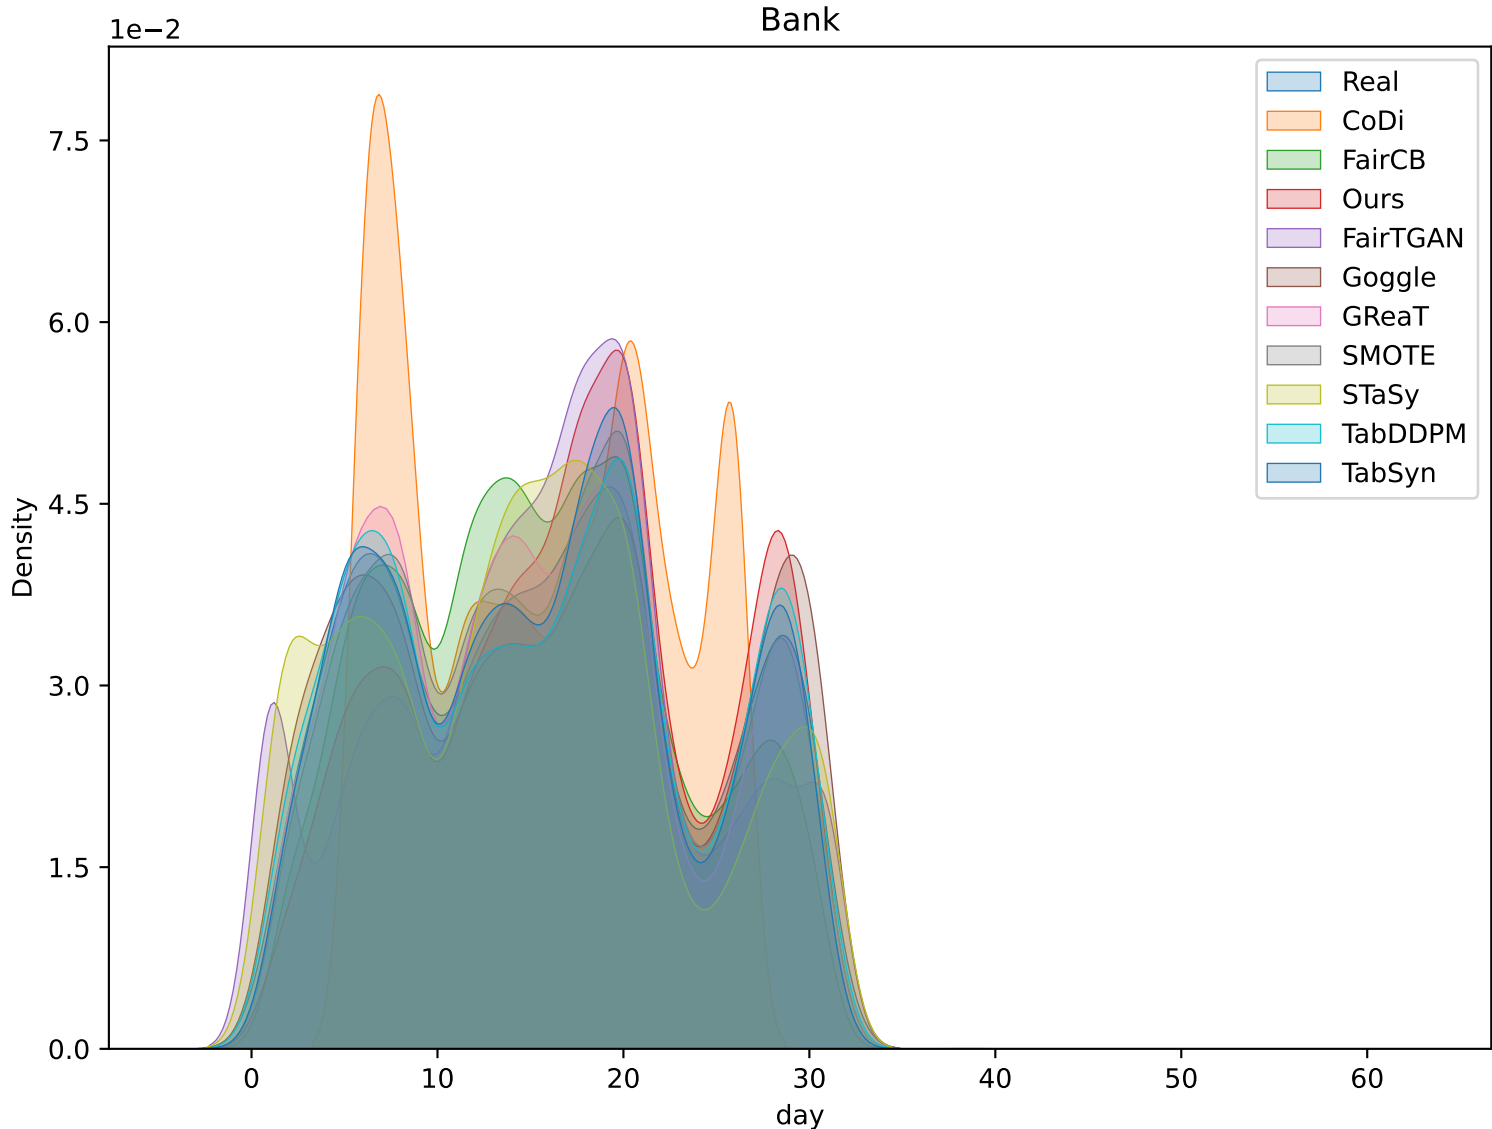

Supplement: supplementary_material [file attachment]

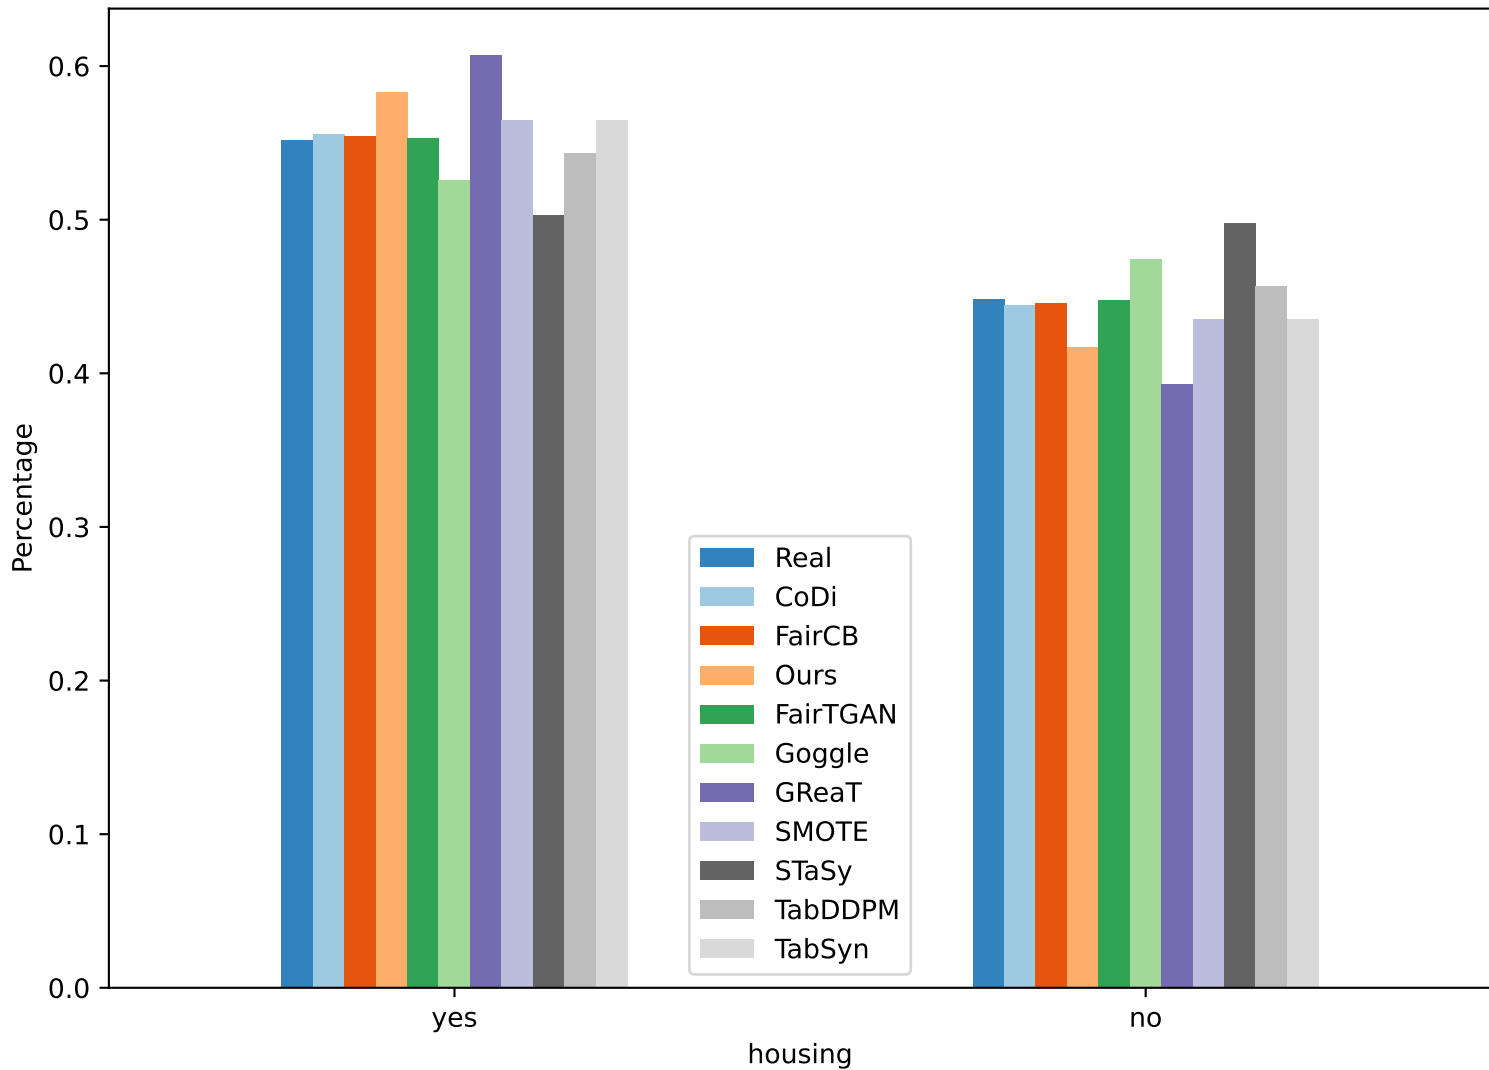

Supplement: supplementary_material [file attachment]

COMPAS

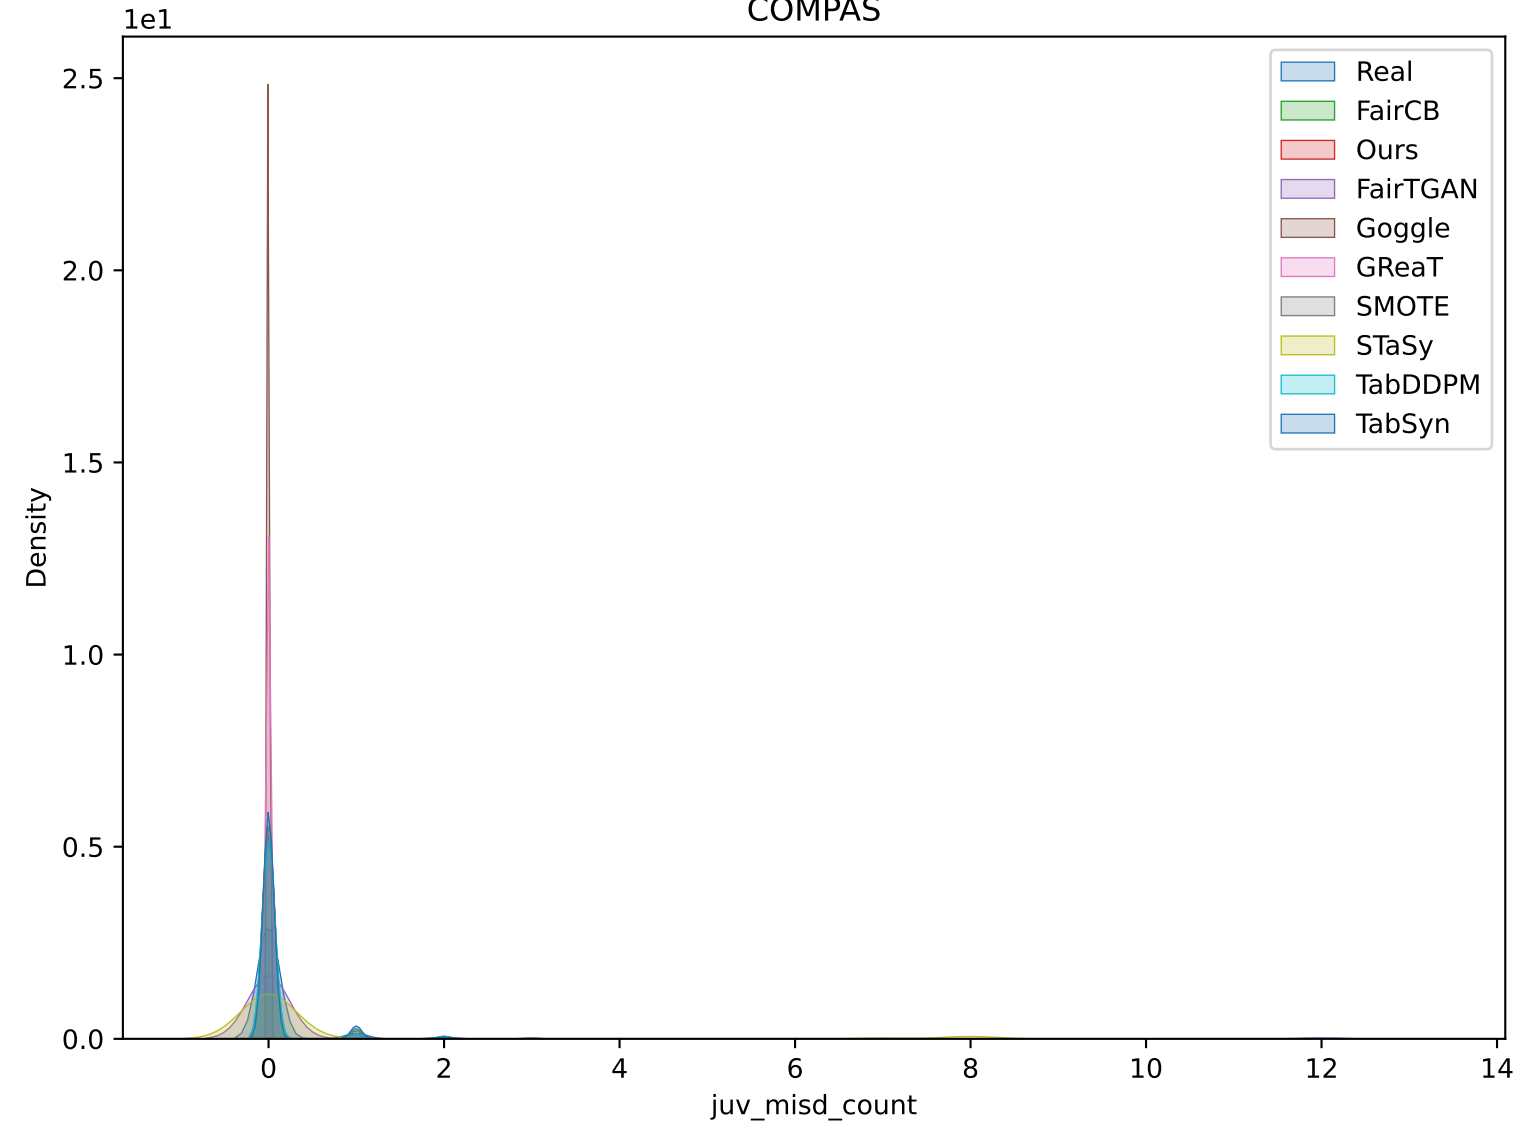

Supplement: supplementary_material [file attachment]

Bank

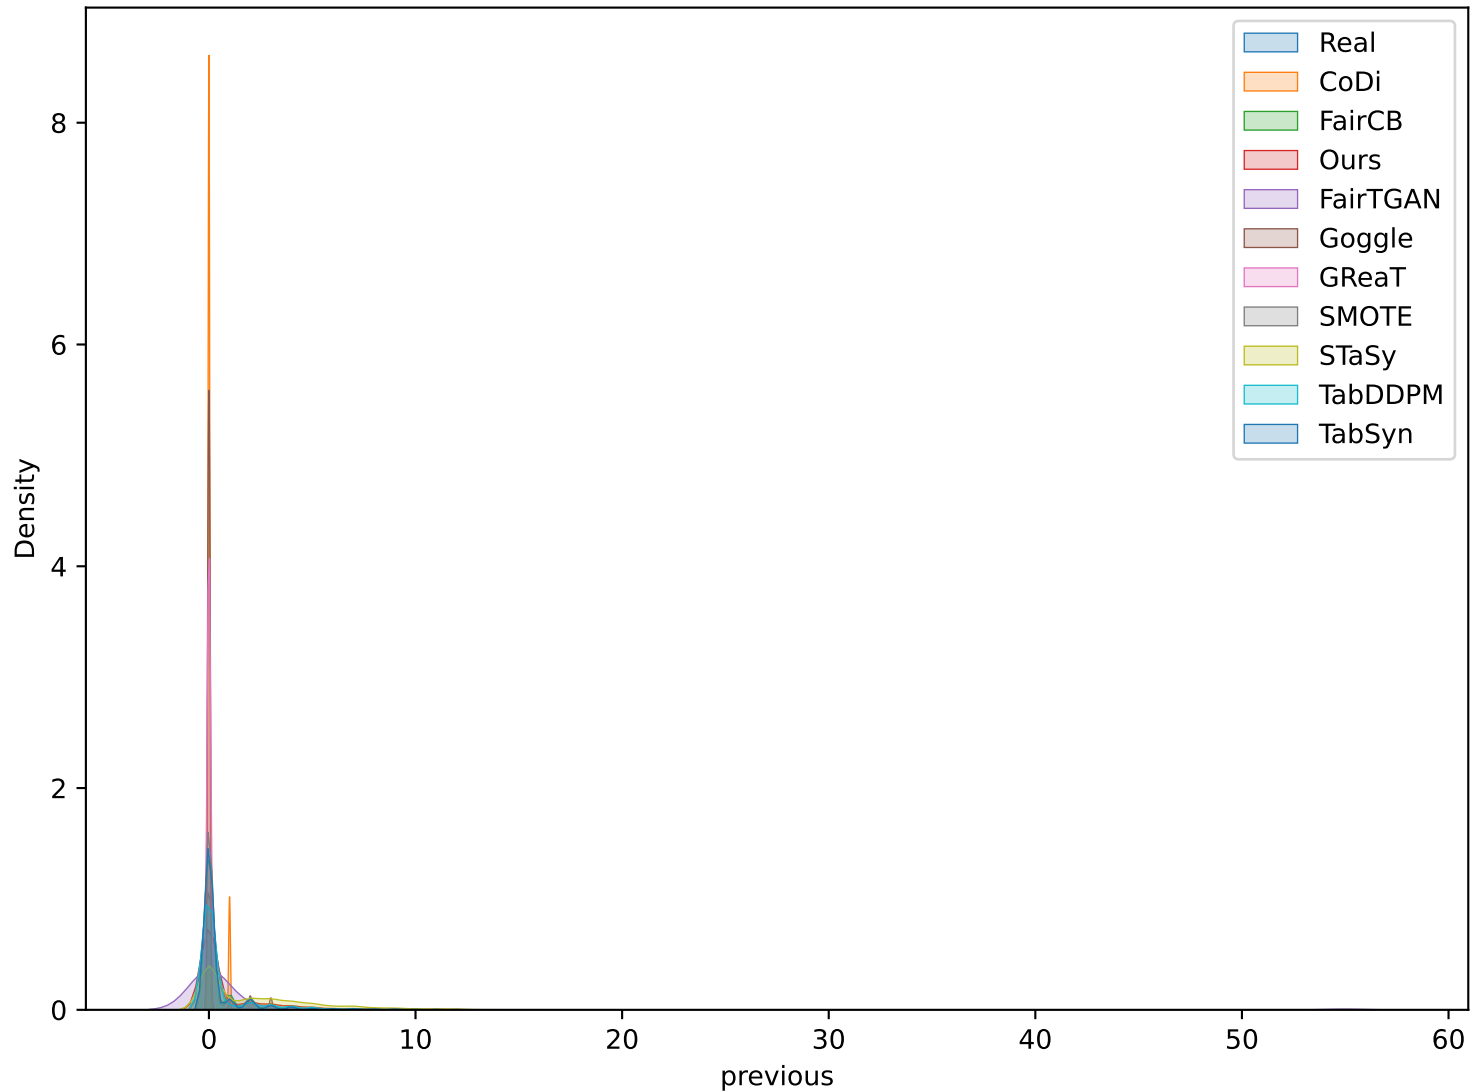

Supplement: supplementary_material [file attachment]

COMPAS

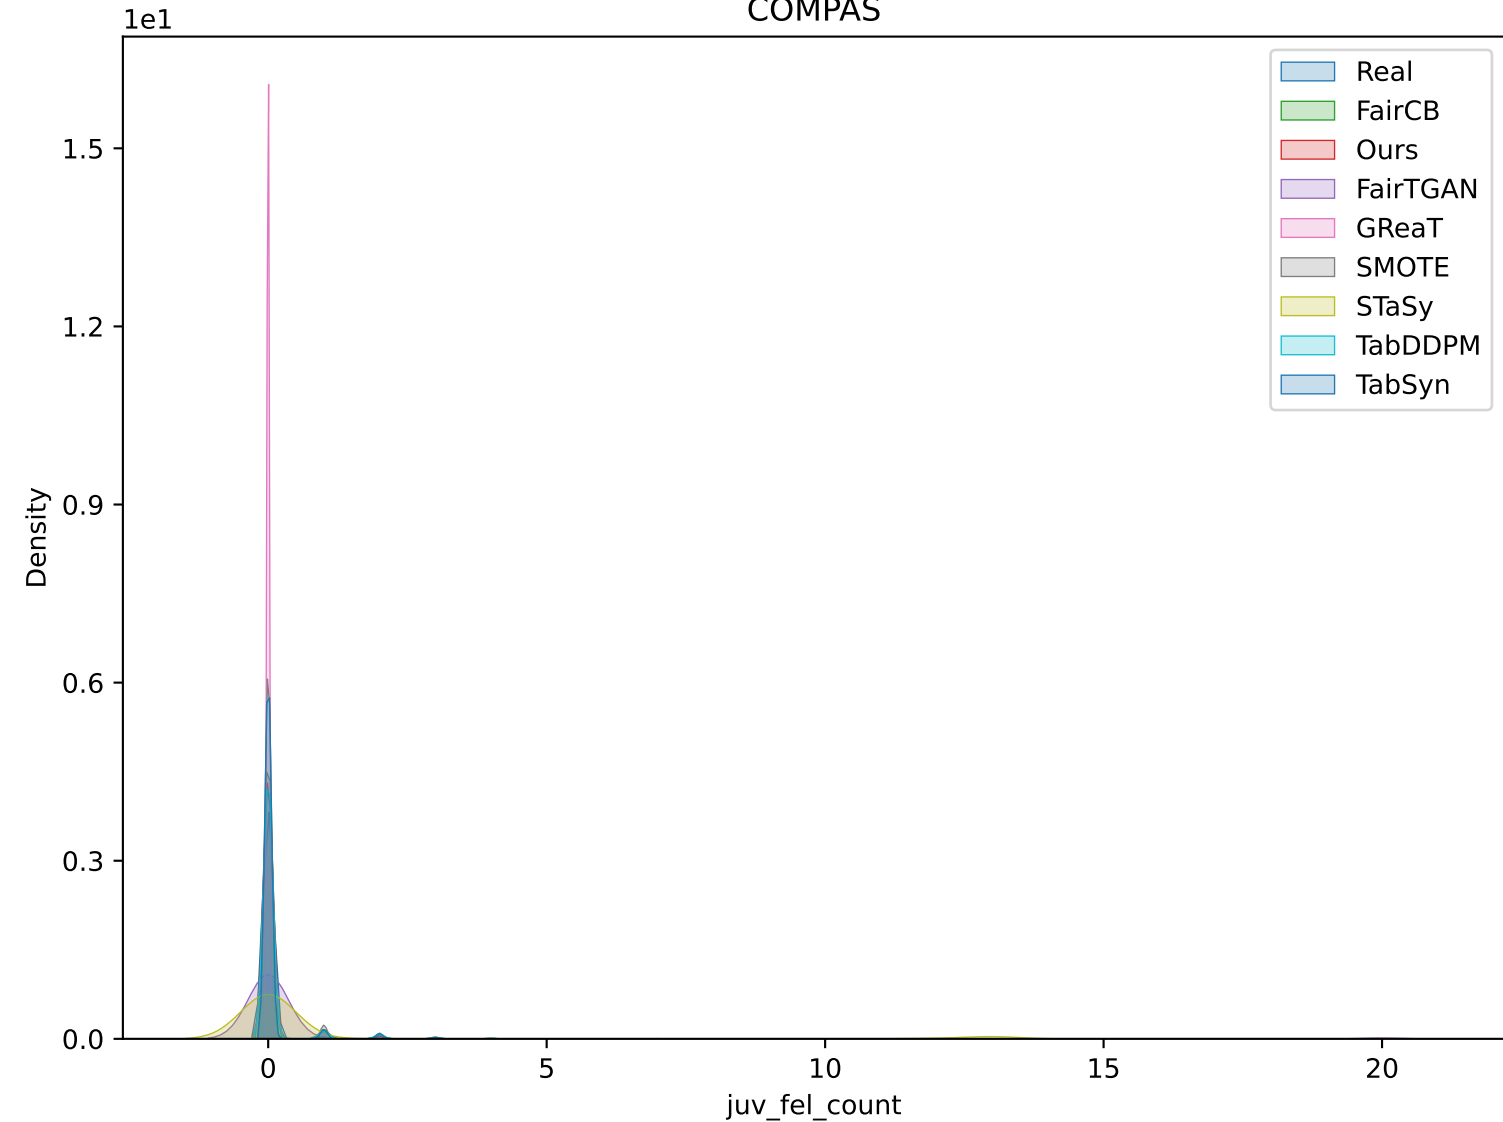

Supplement: supplementary_material [file attachment]

Bank

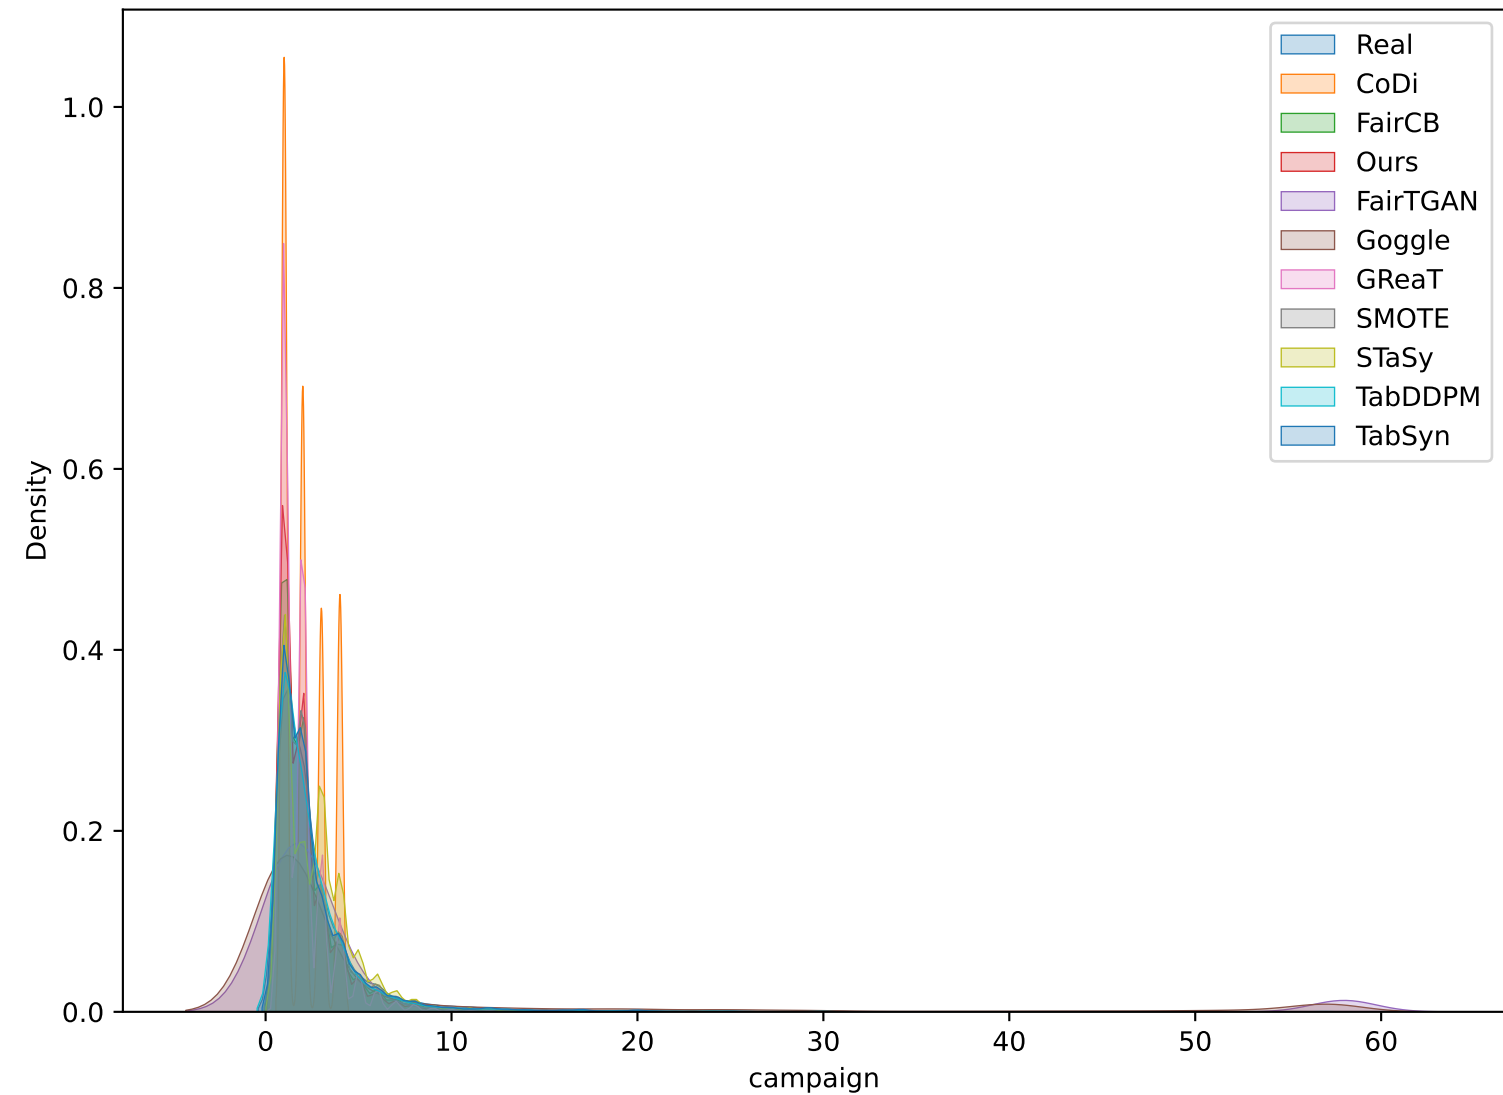

Supplement: supplementary_material [file attachment]

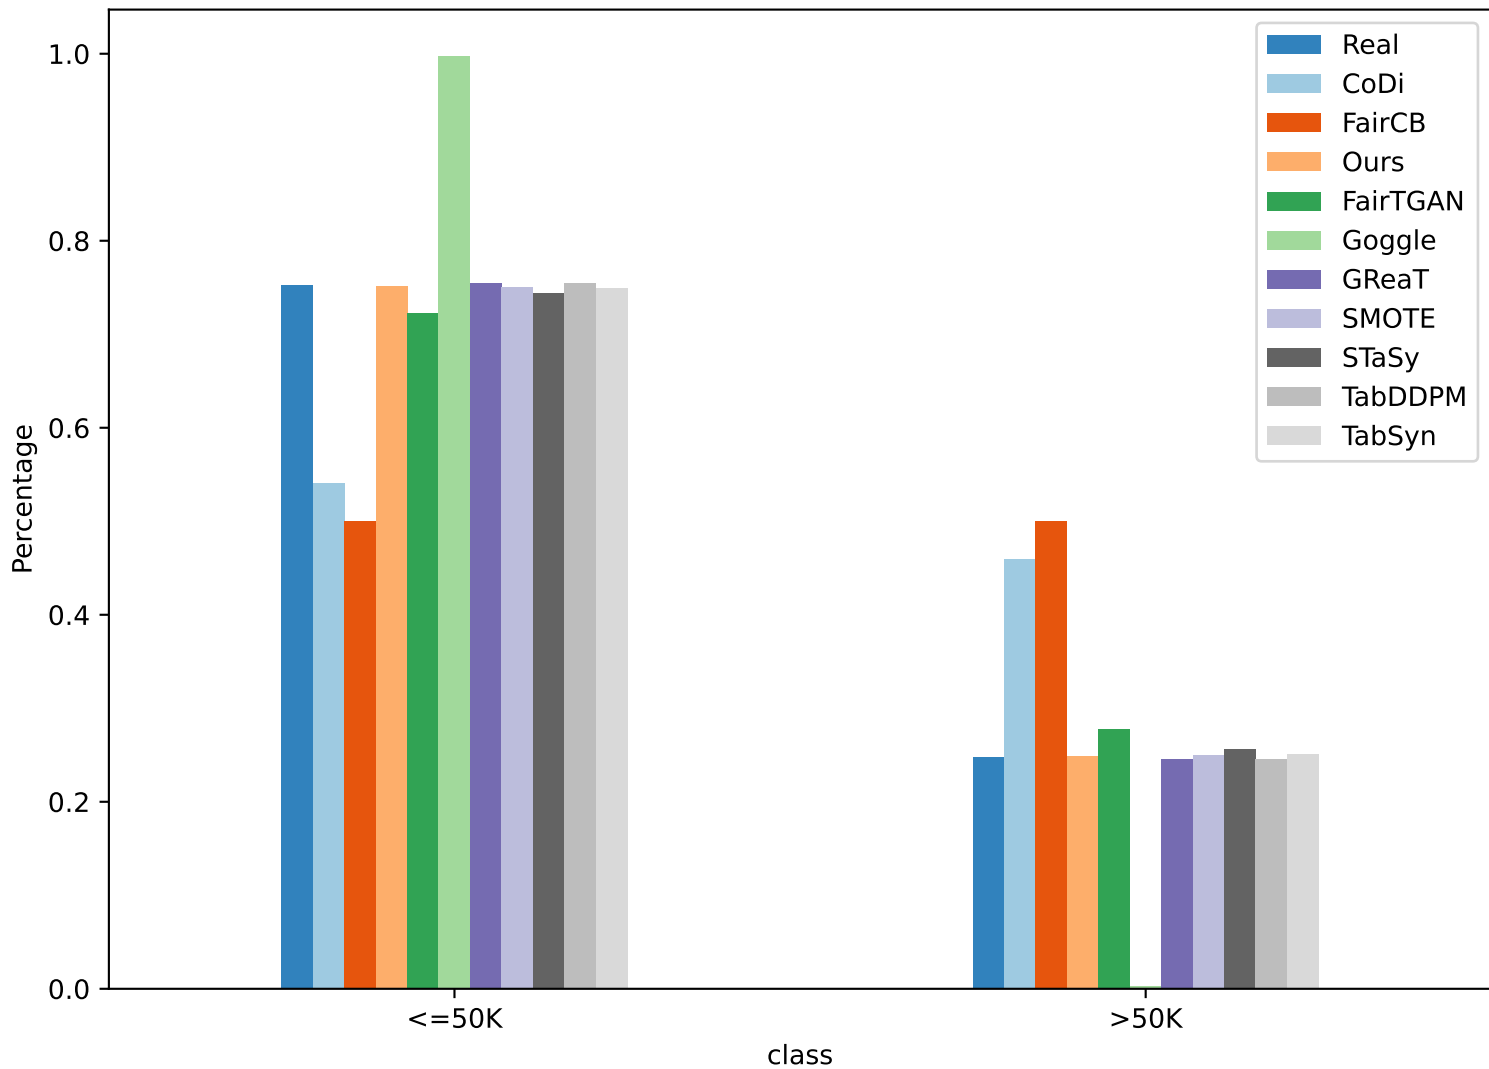

Supplement: supplementary_material [file attachment]

COMPAS

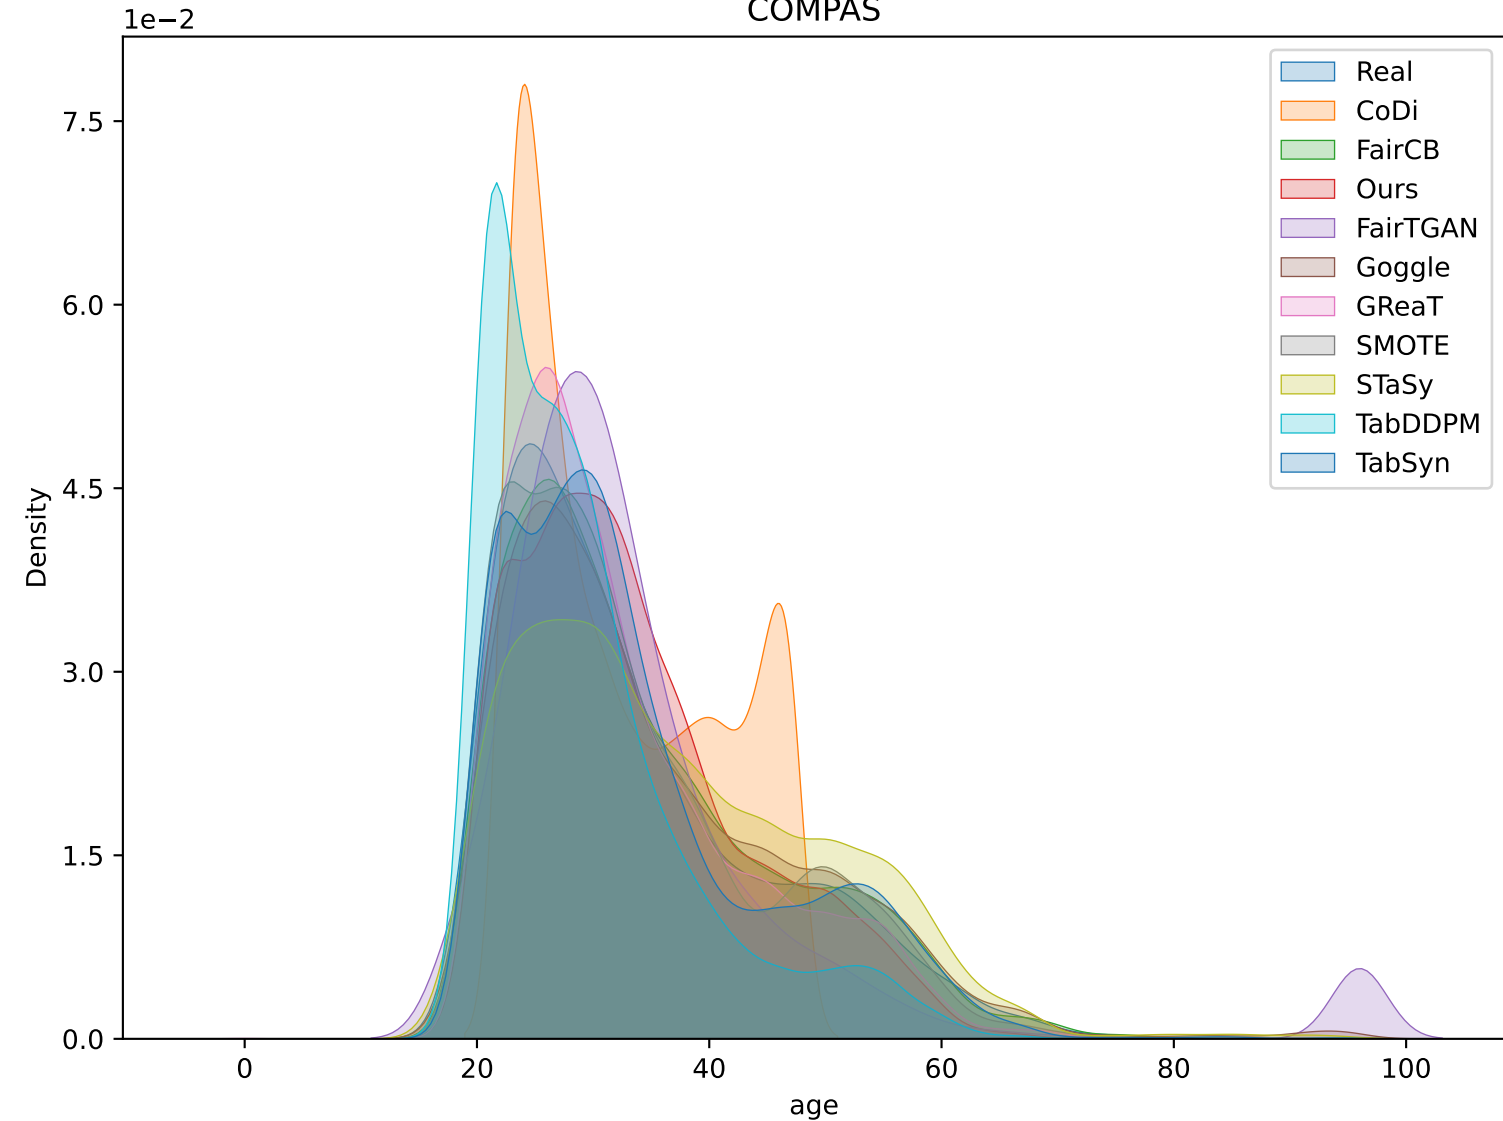

Supplement: supplementary_material [file attachment]

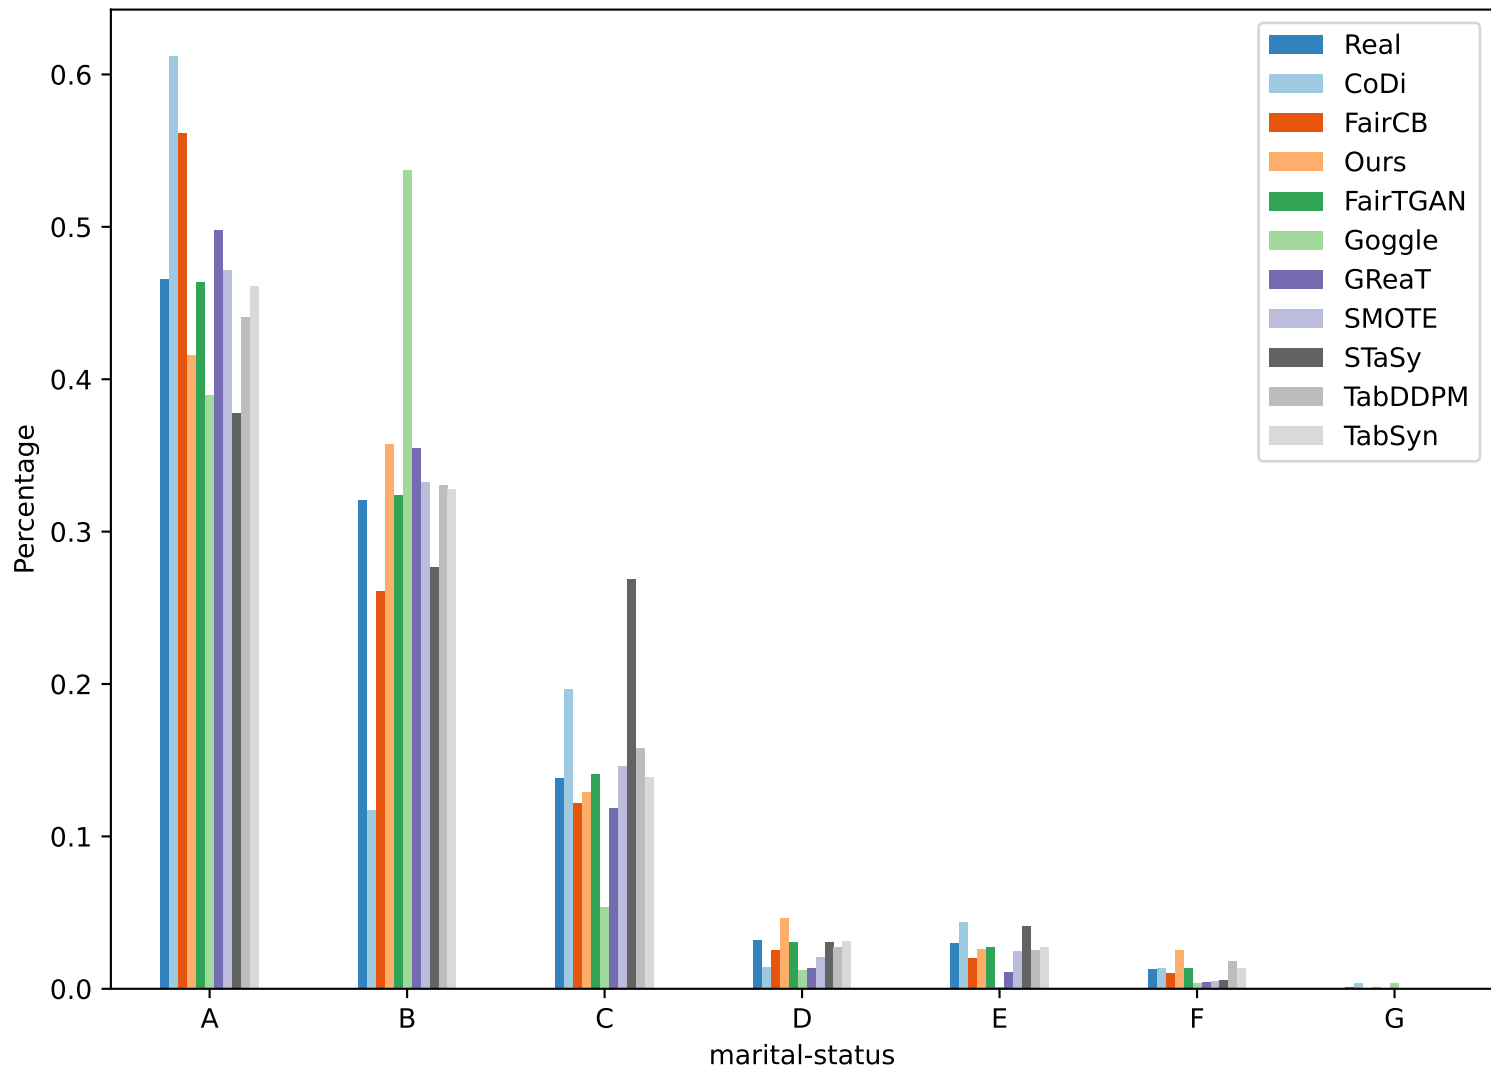

Supplement: supplementary_material [file attachment]

# (FairCB) sensitive attributes vs target label on the Bank dataset

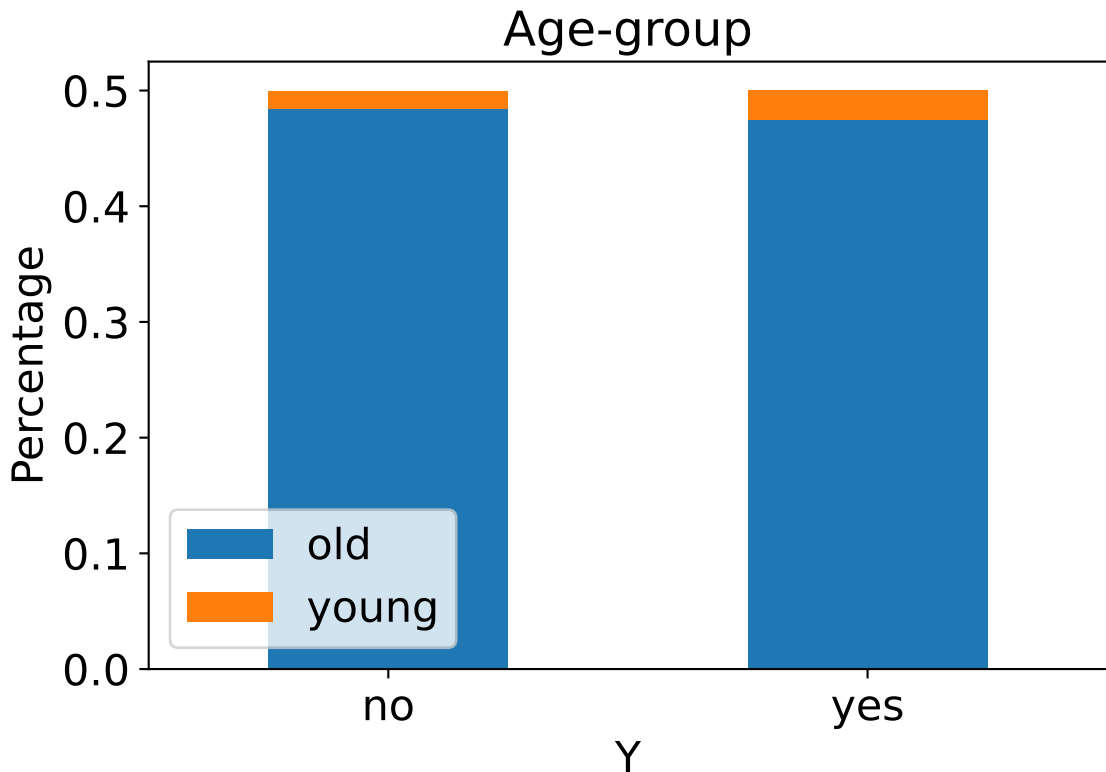

Supplement: supplementary_material [file attachment]

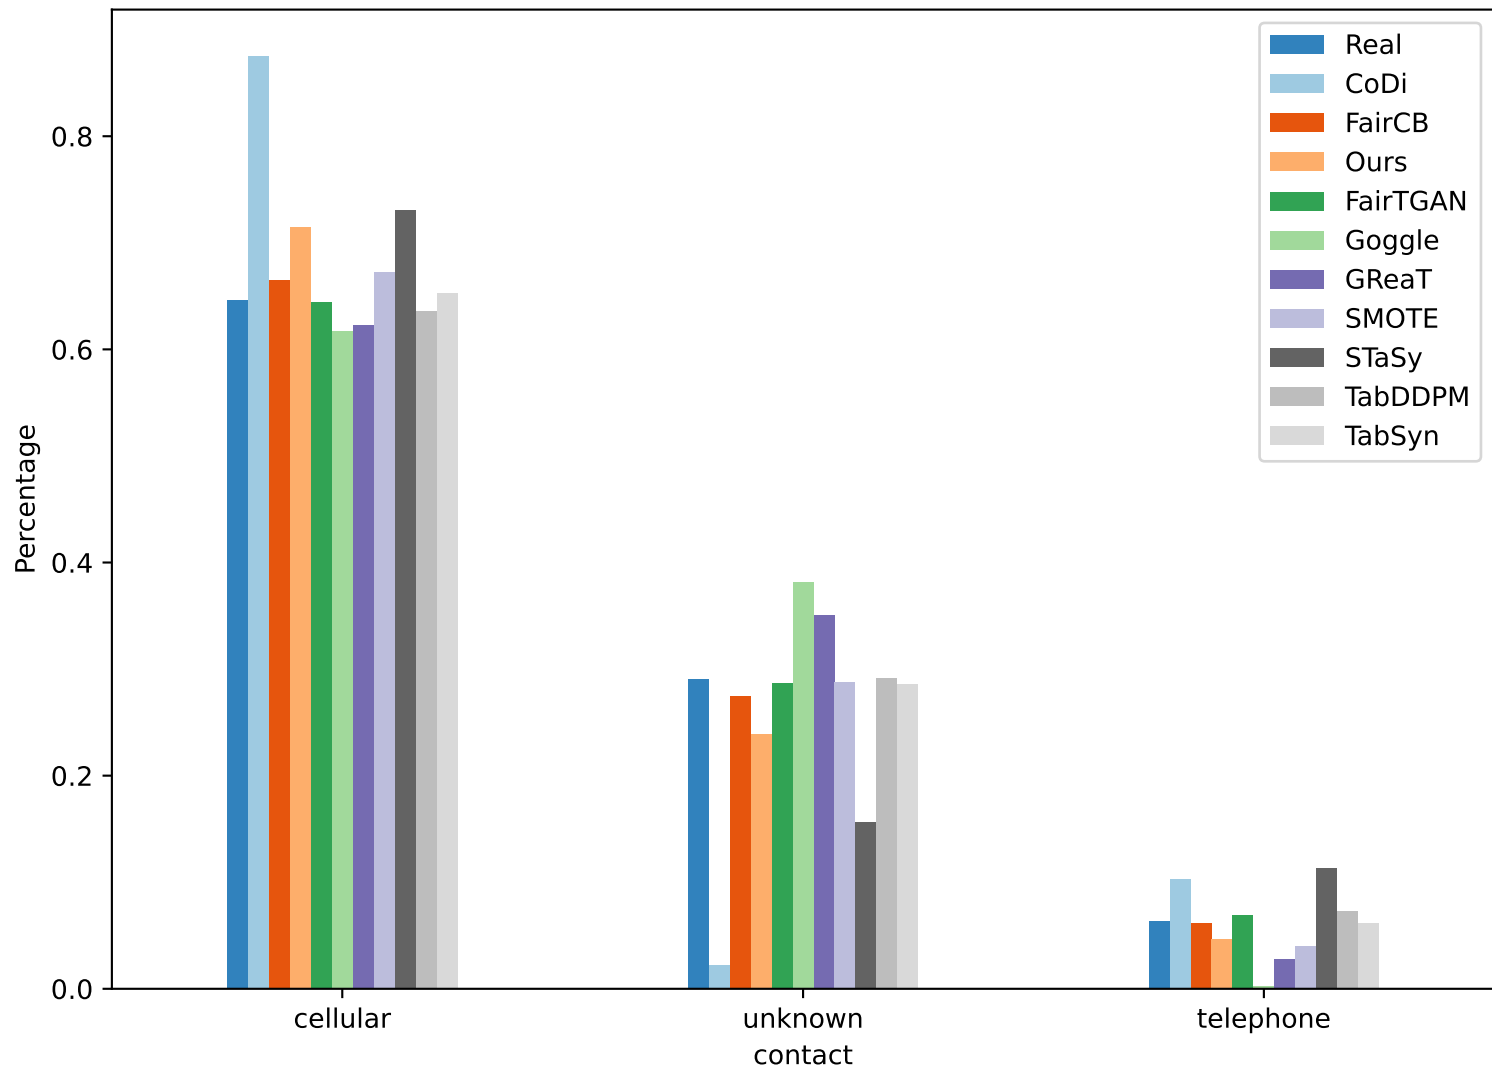

Supplement: supplementary_material [file attachment]

Heatmap of Contingency Tables for Real and Synthetic Data on Adult Dataset

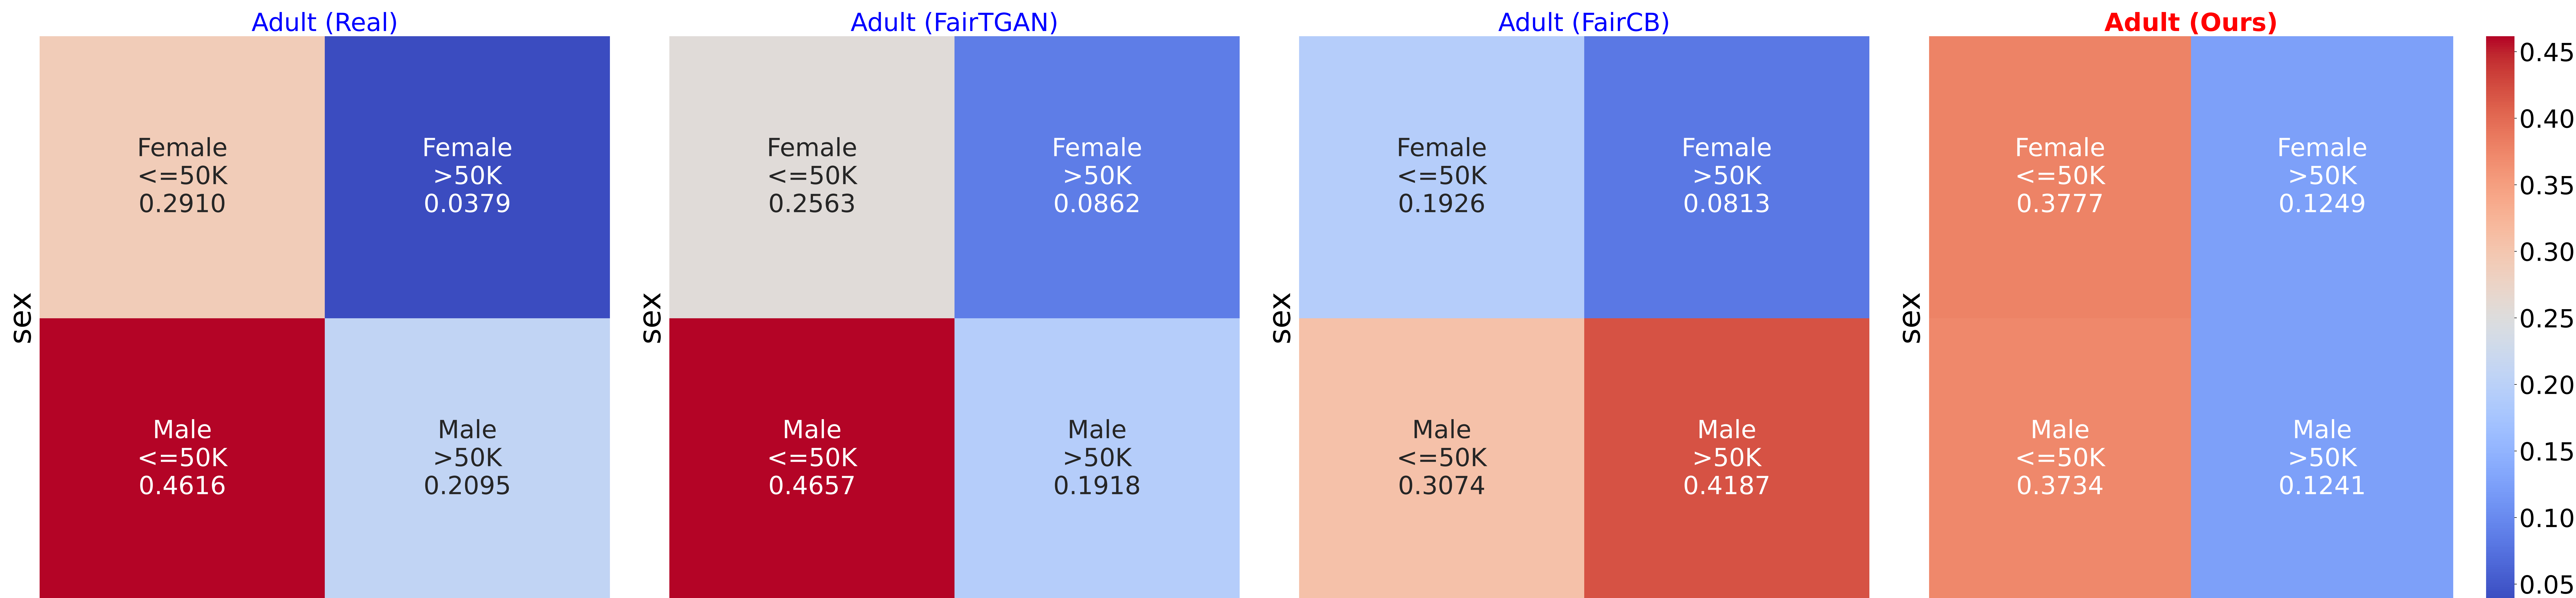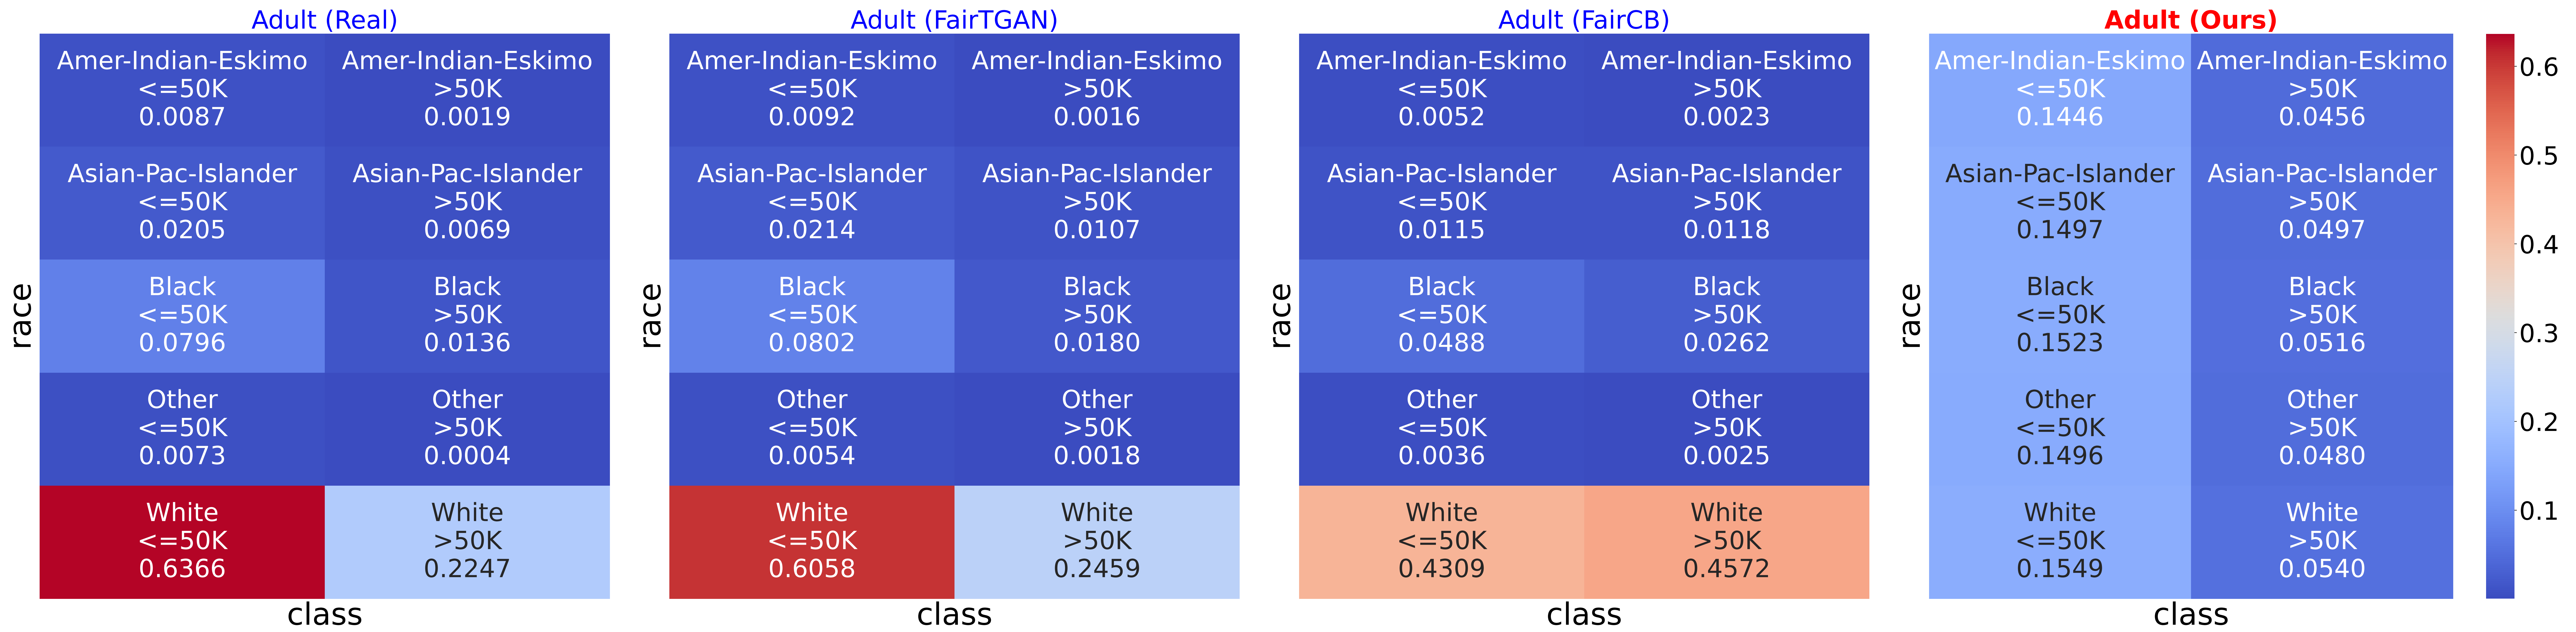

Supplement: supplementary_material [file attachment]

(Ours) sensitive attributes vs target label  
on the Adult dataset

Sex

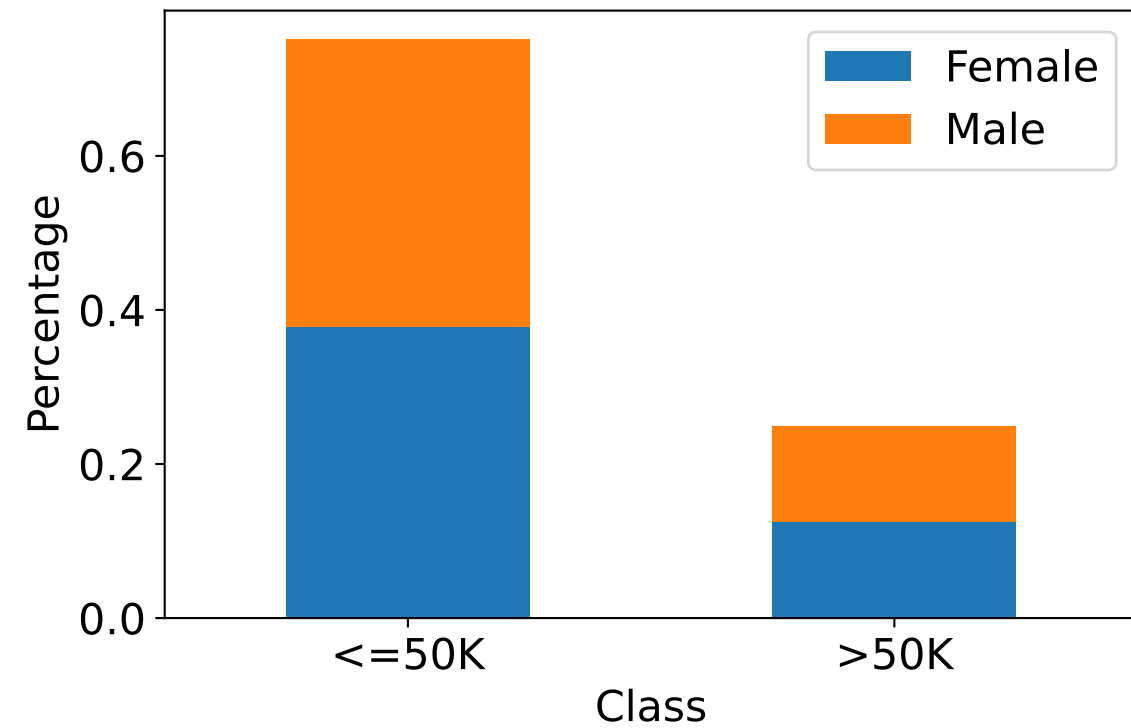

Race

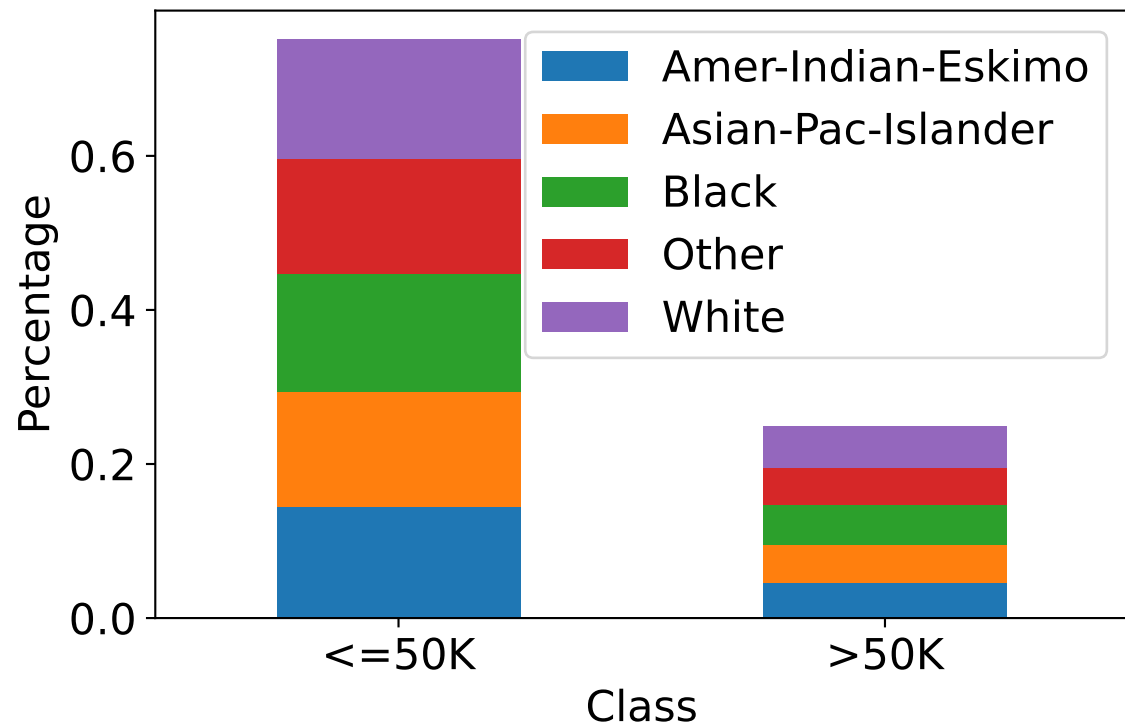

Supplement: supplementary_material [file attachment]

Adult

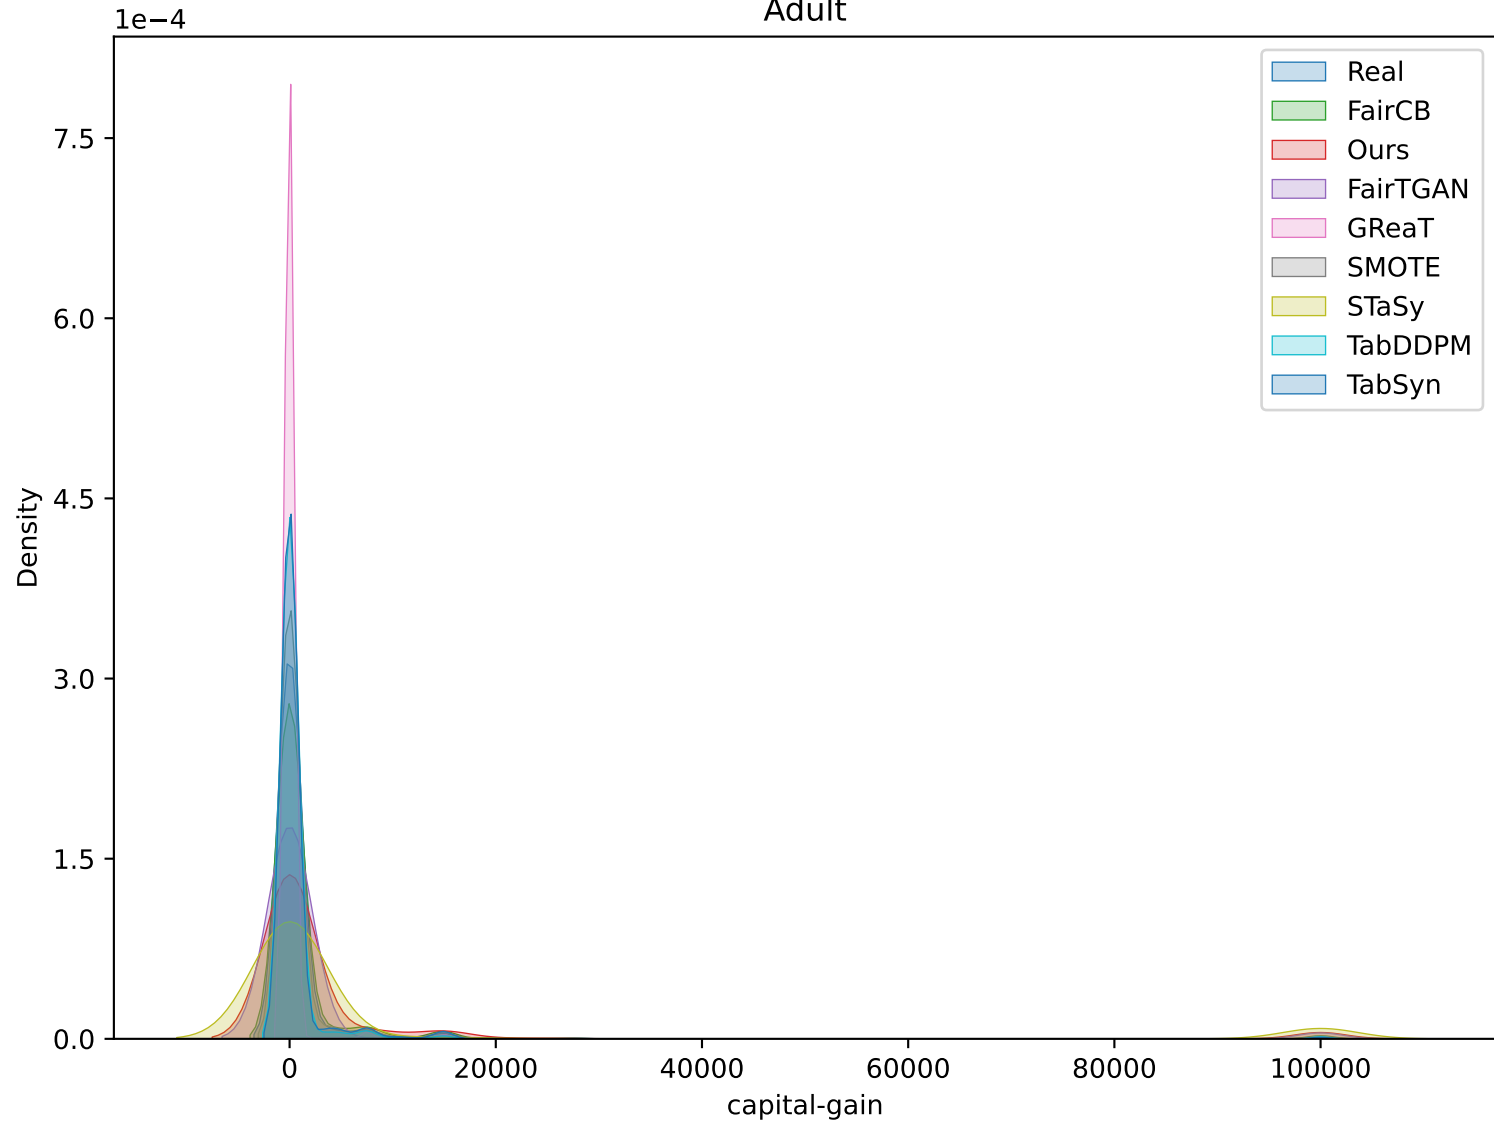

Supplement: supplementary_material [file attachment]

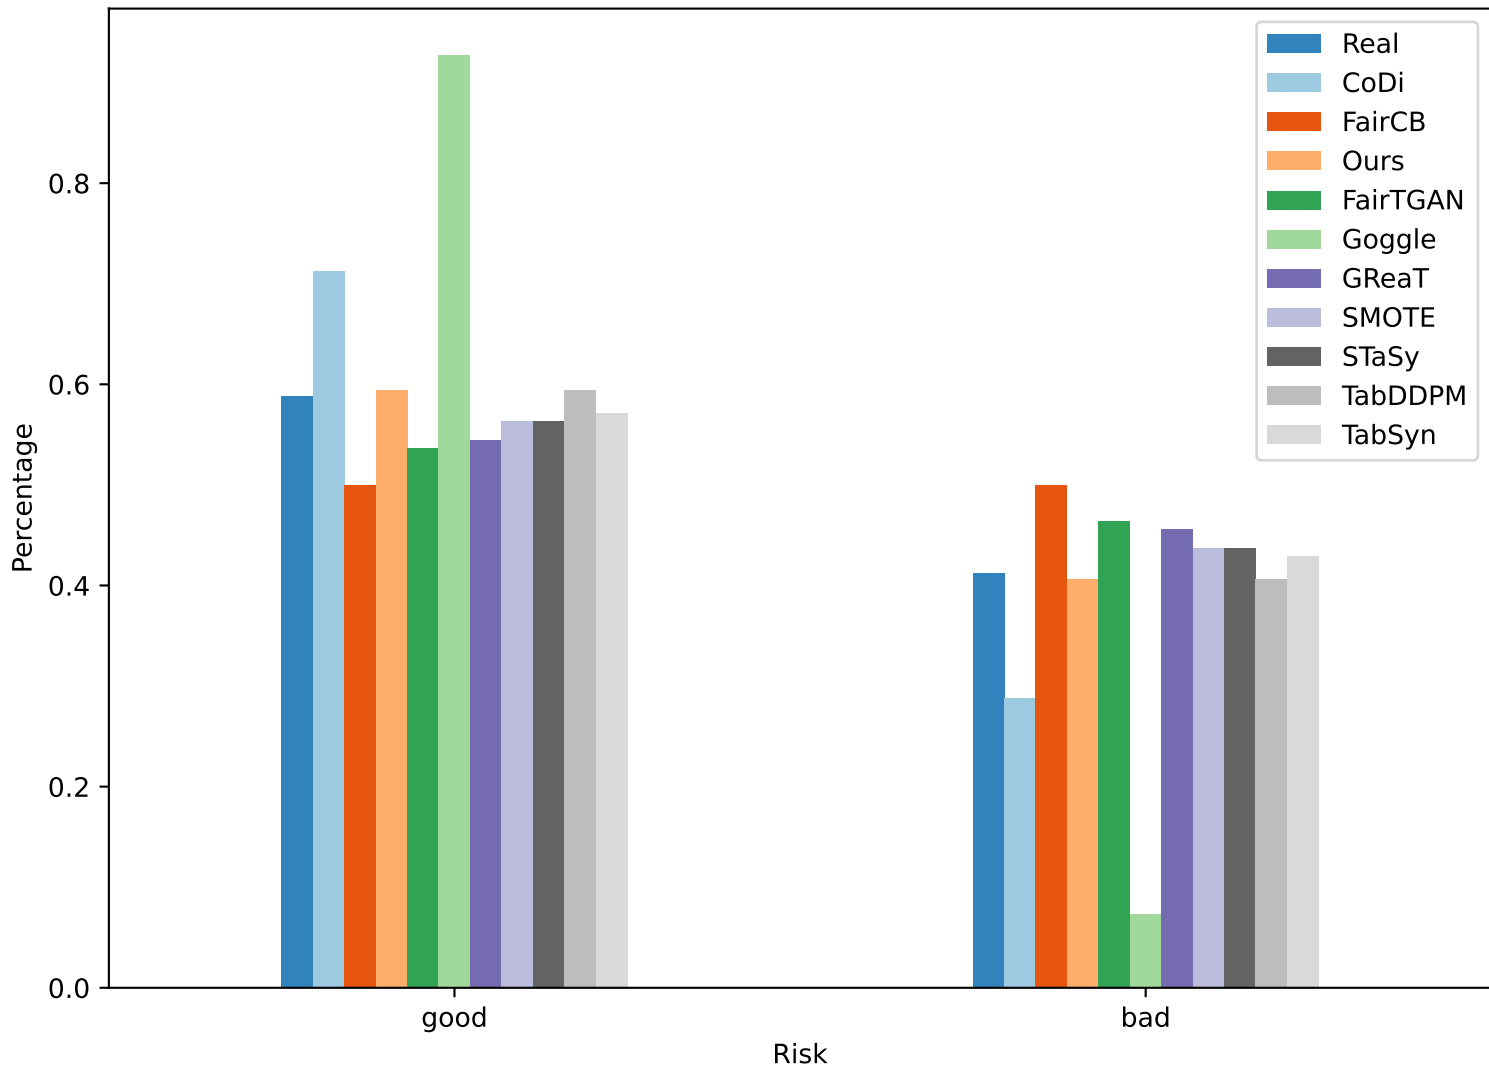

Supplement: supplementary_material [file attachment]

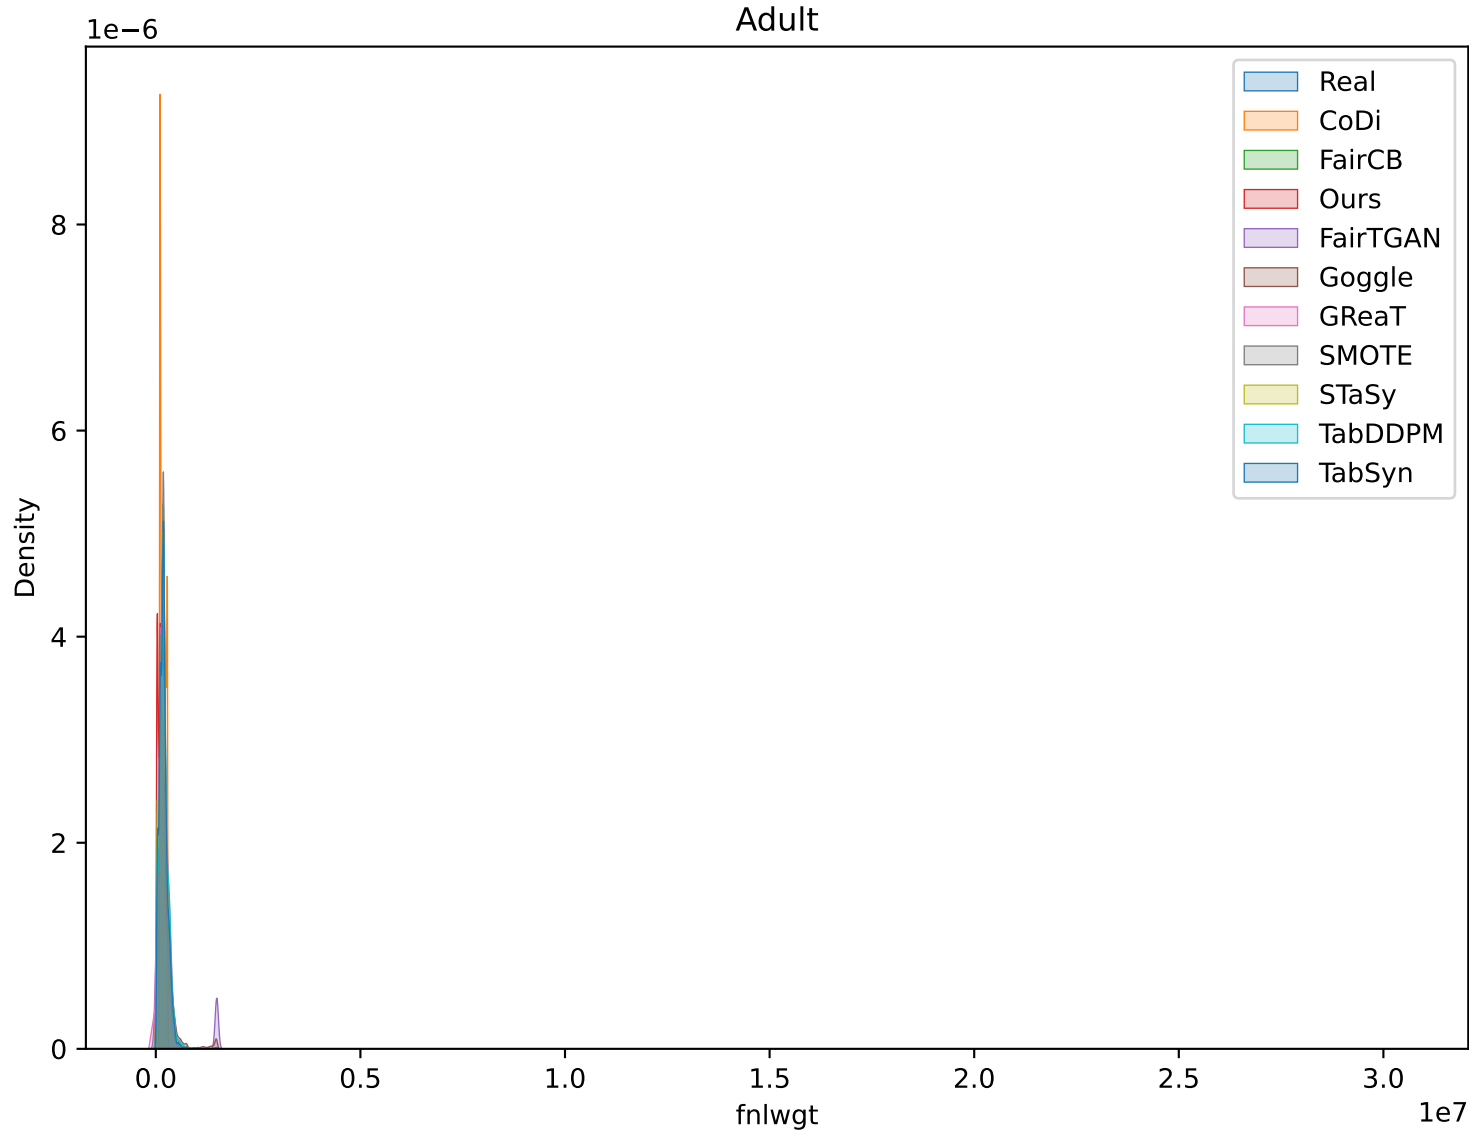

Supplement: supplementary_material [file attachment]

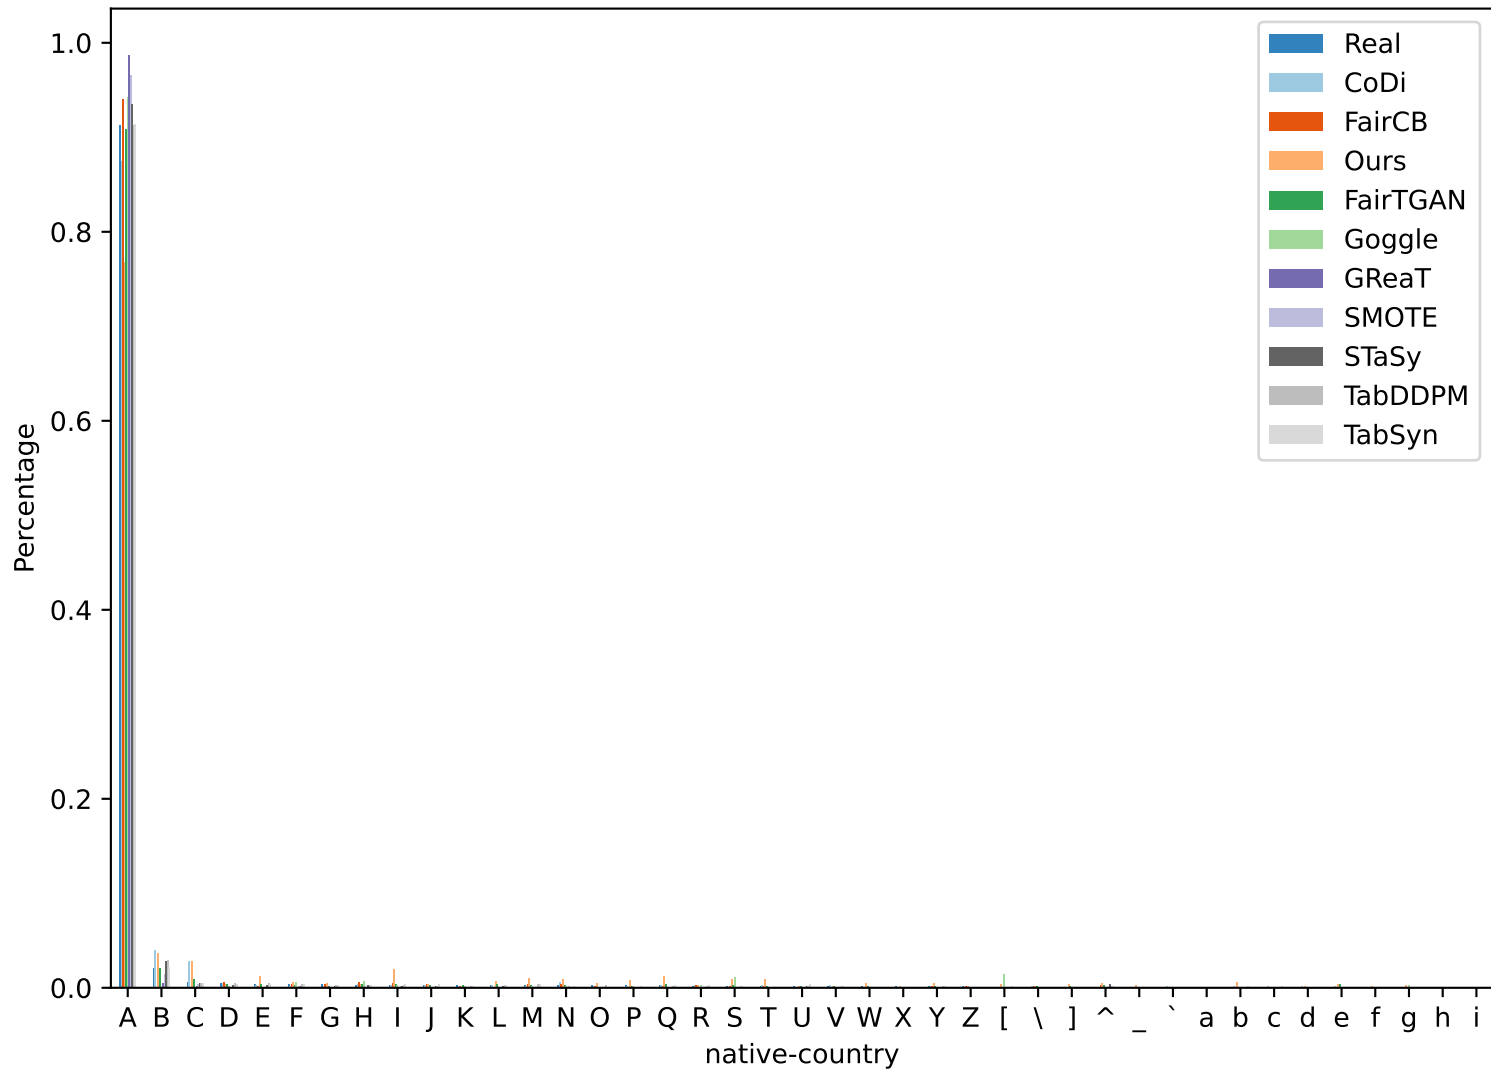

Supplement: supplementary_material [file attachment]

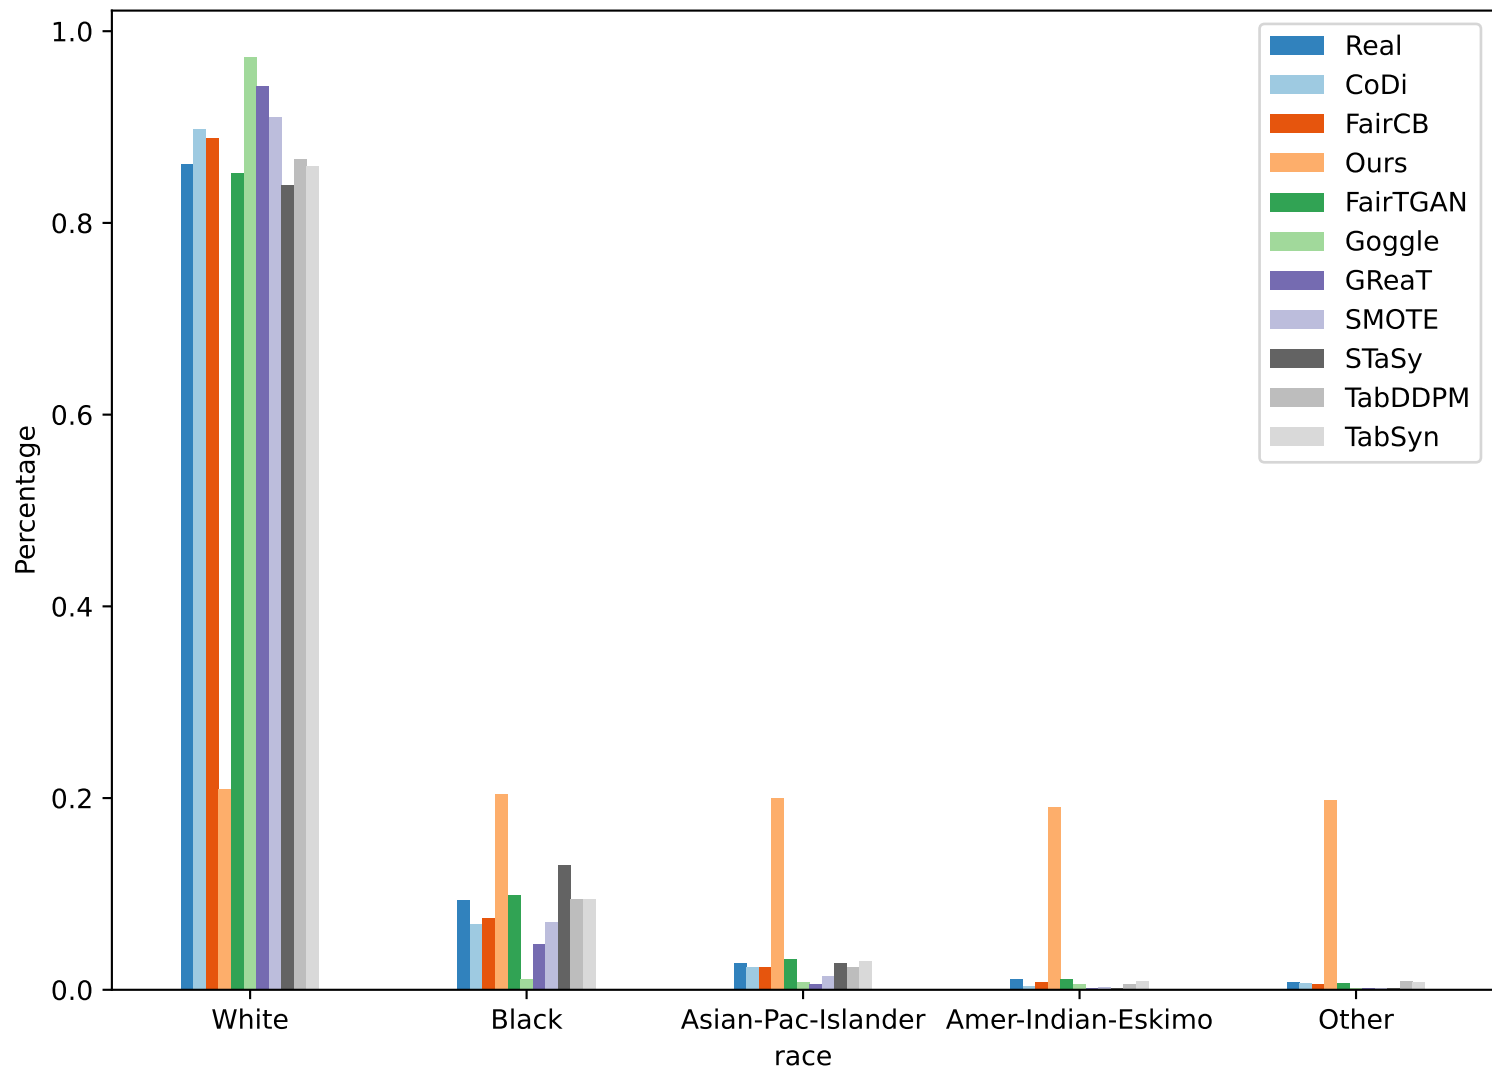

Supplement: supplementary_material [file attachment]

Heatmap of Contingency Tables for Real and Synthetic Data on Bank Dataset

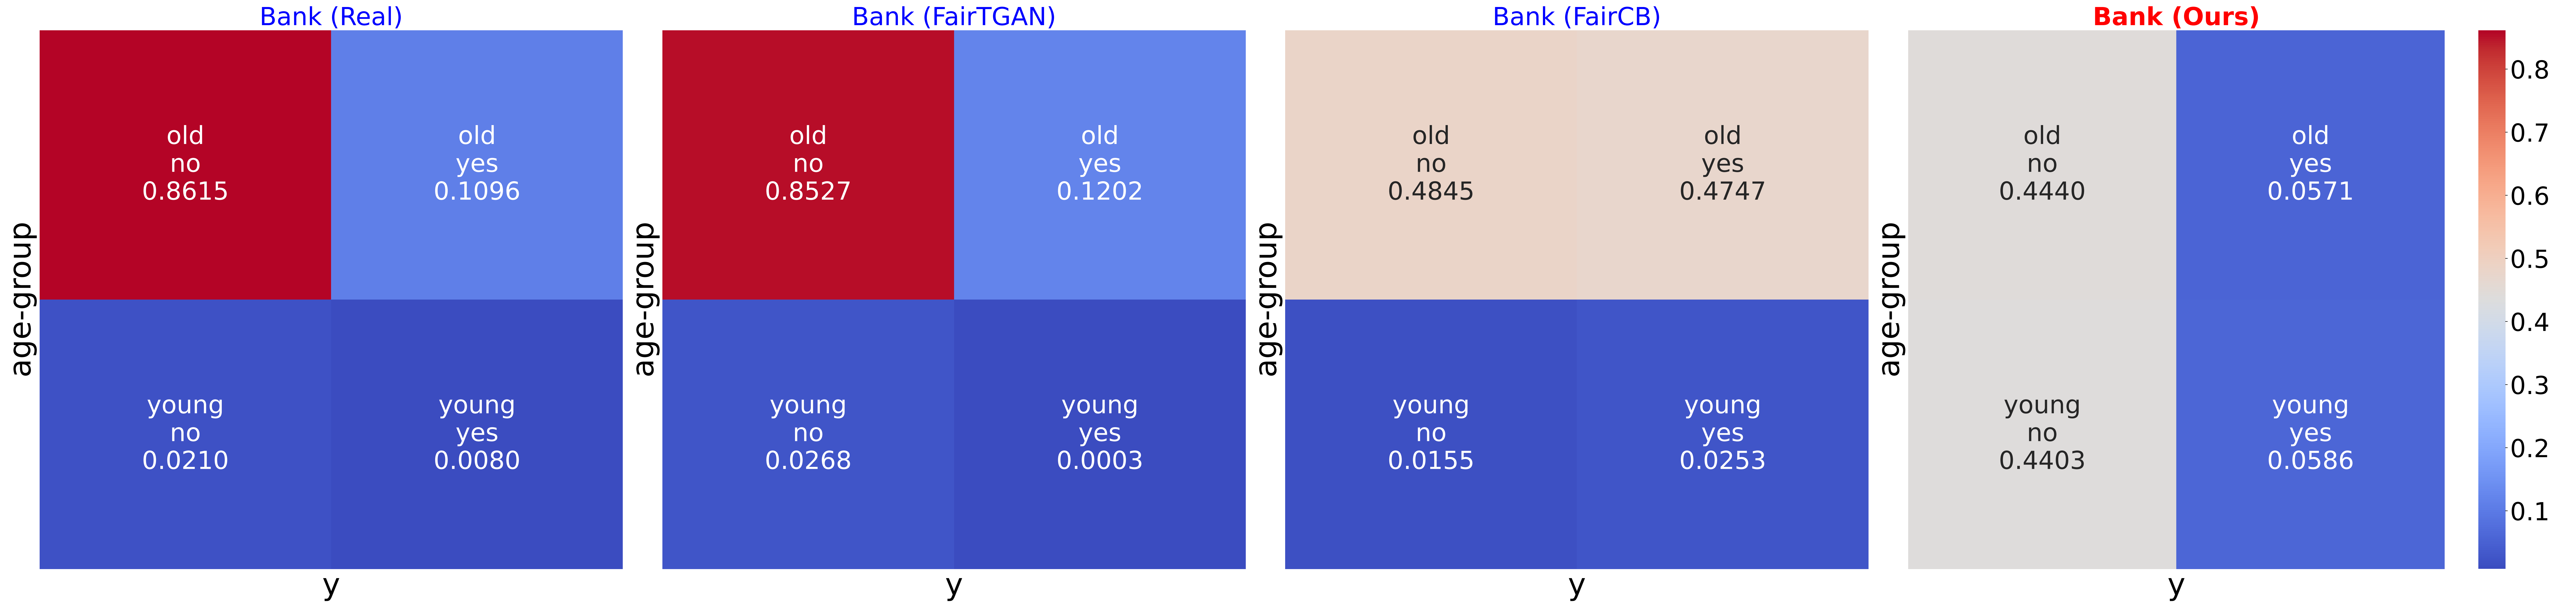

Supplement: supplementary_material [file attachment]

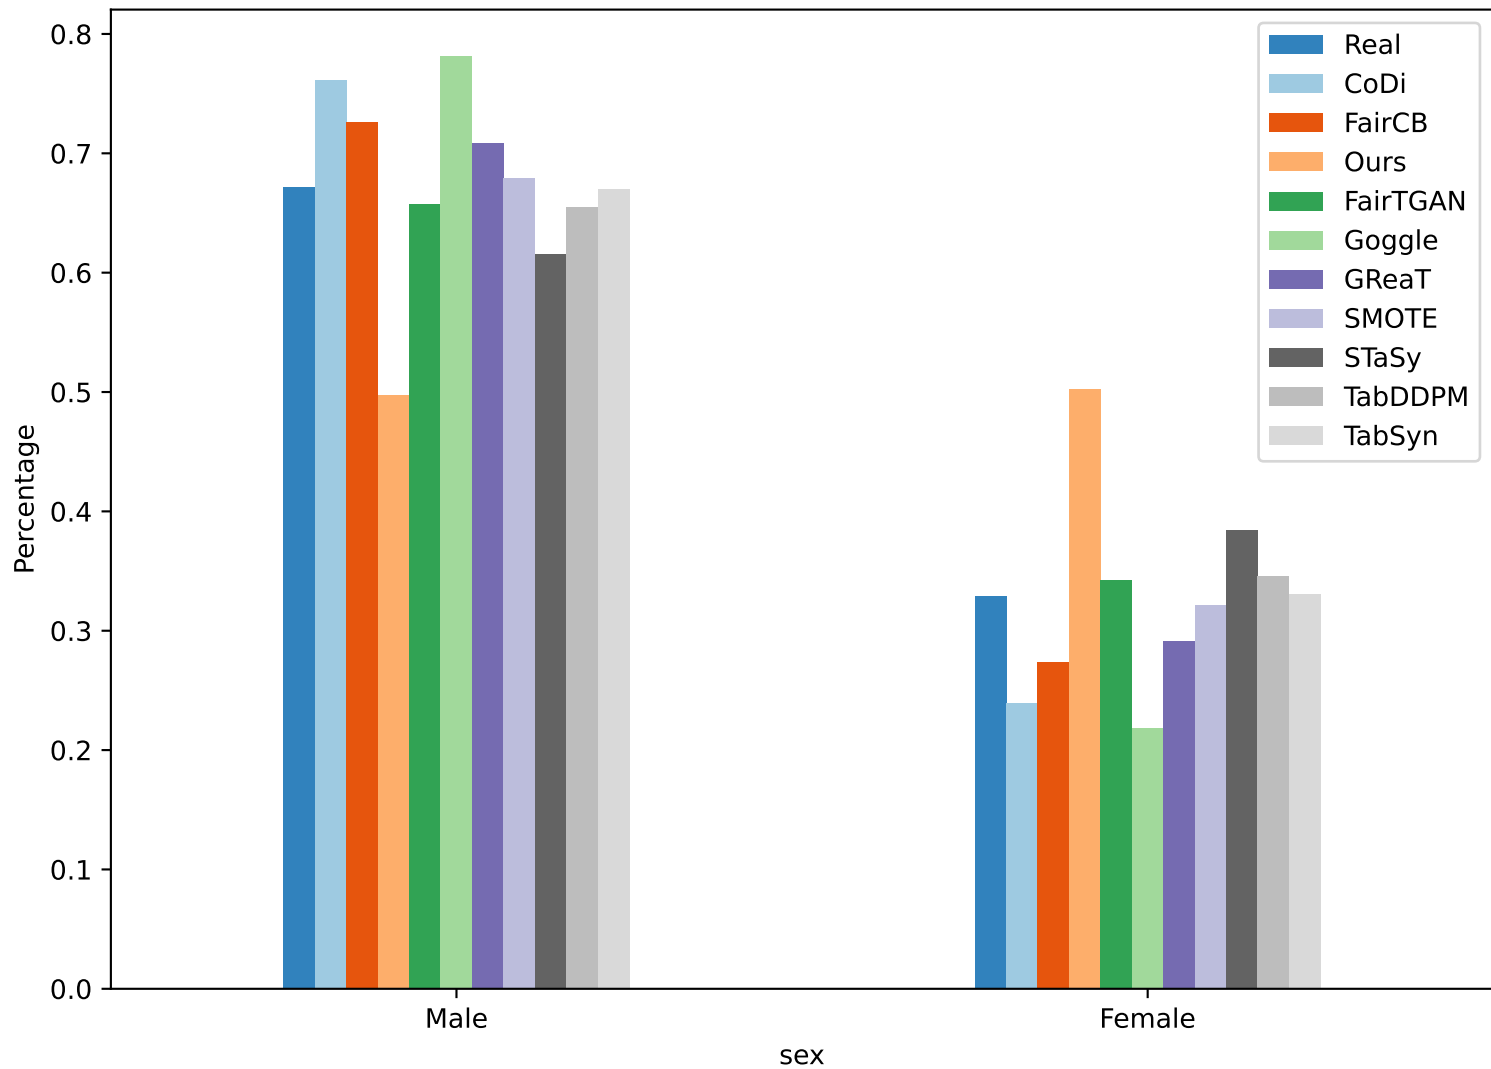

Supplement: supplementary_material [file attachment]

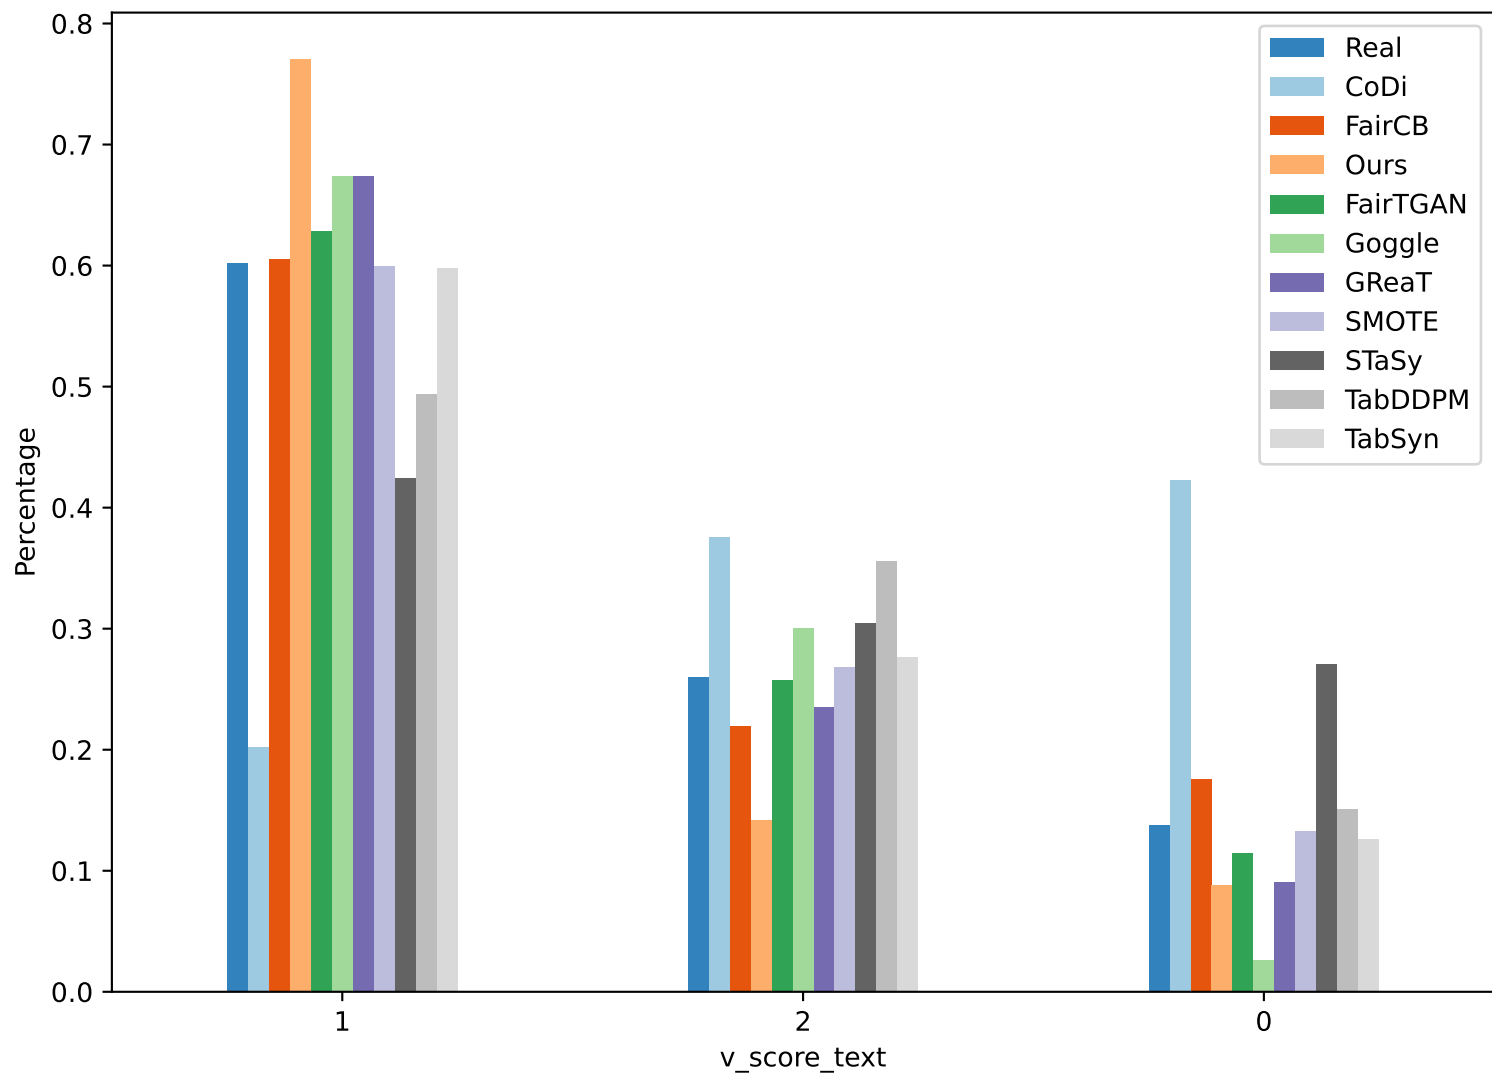

Supplement: supplementary_material [file attachment]

Adult

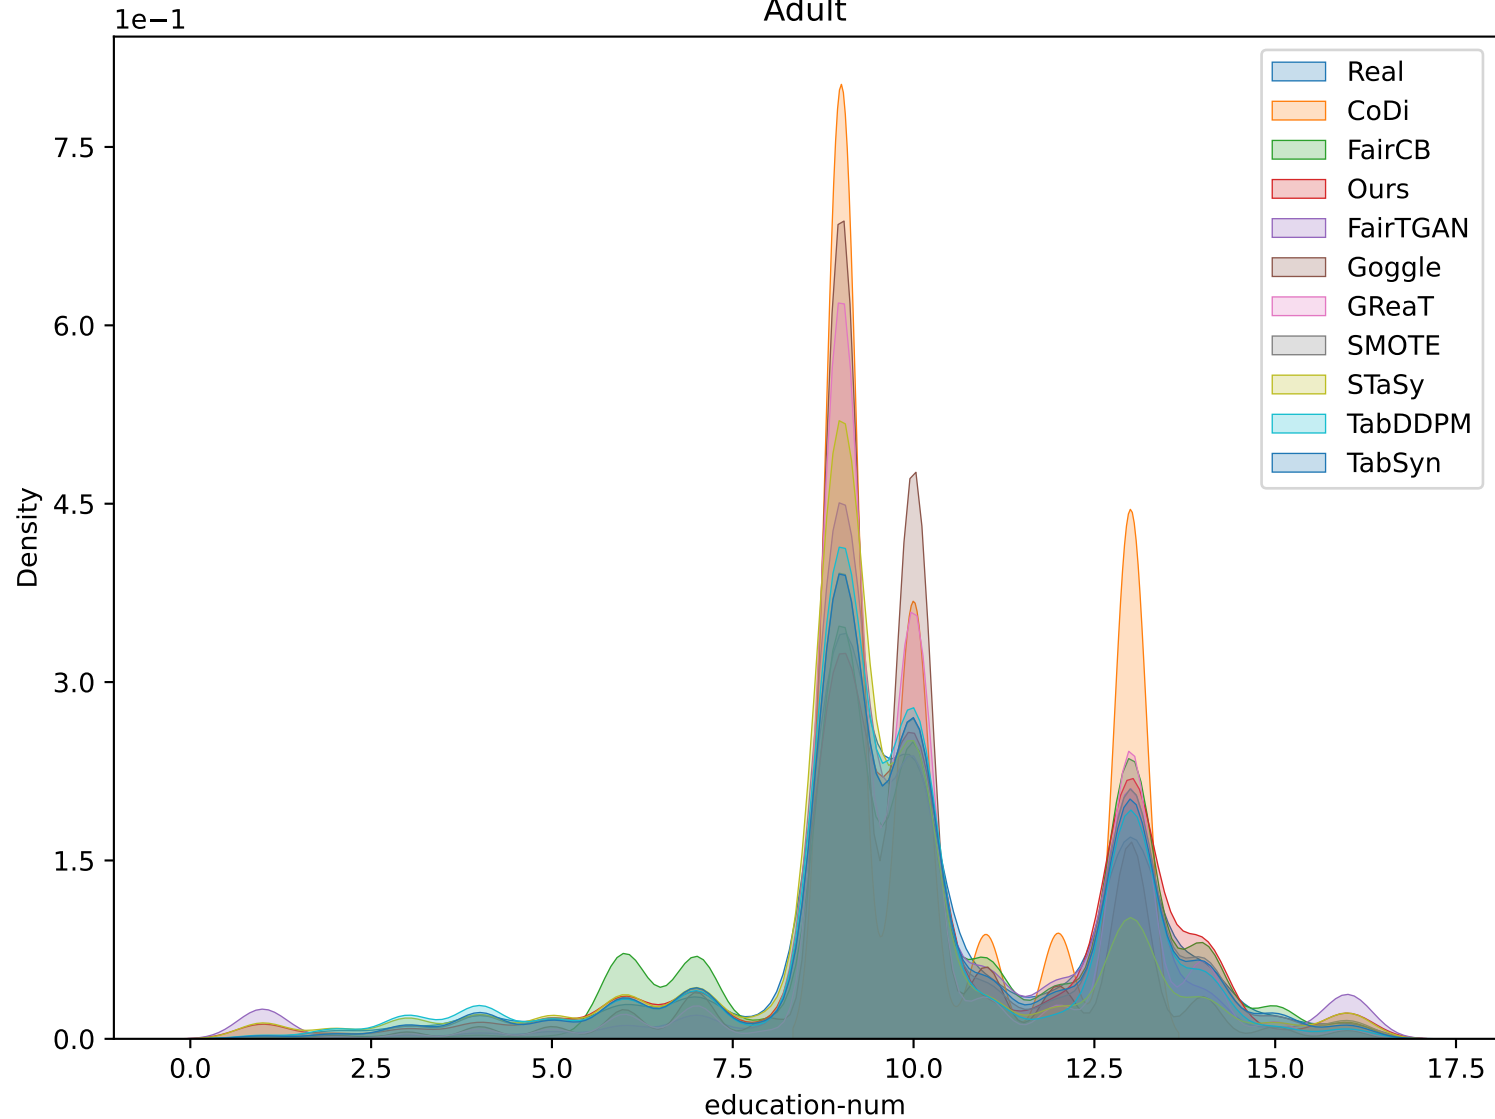

Supplement: supplementary_material [file attachment]

COMPAS

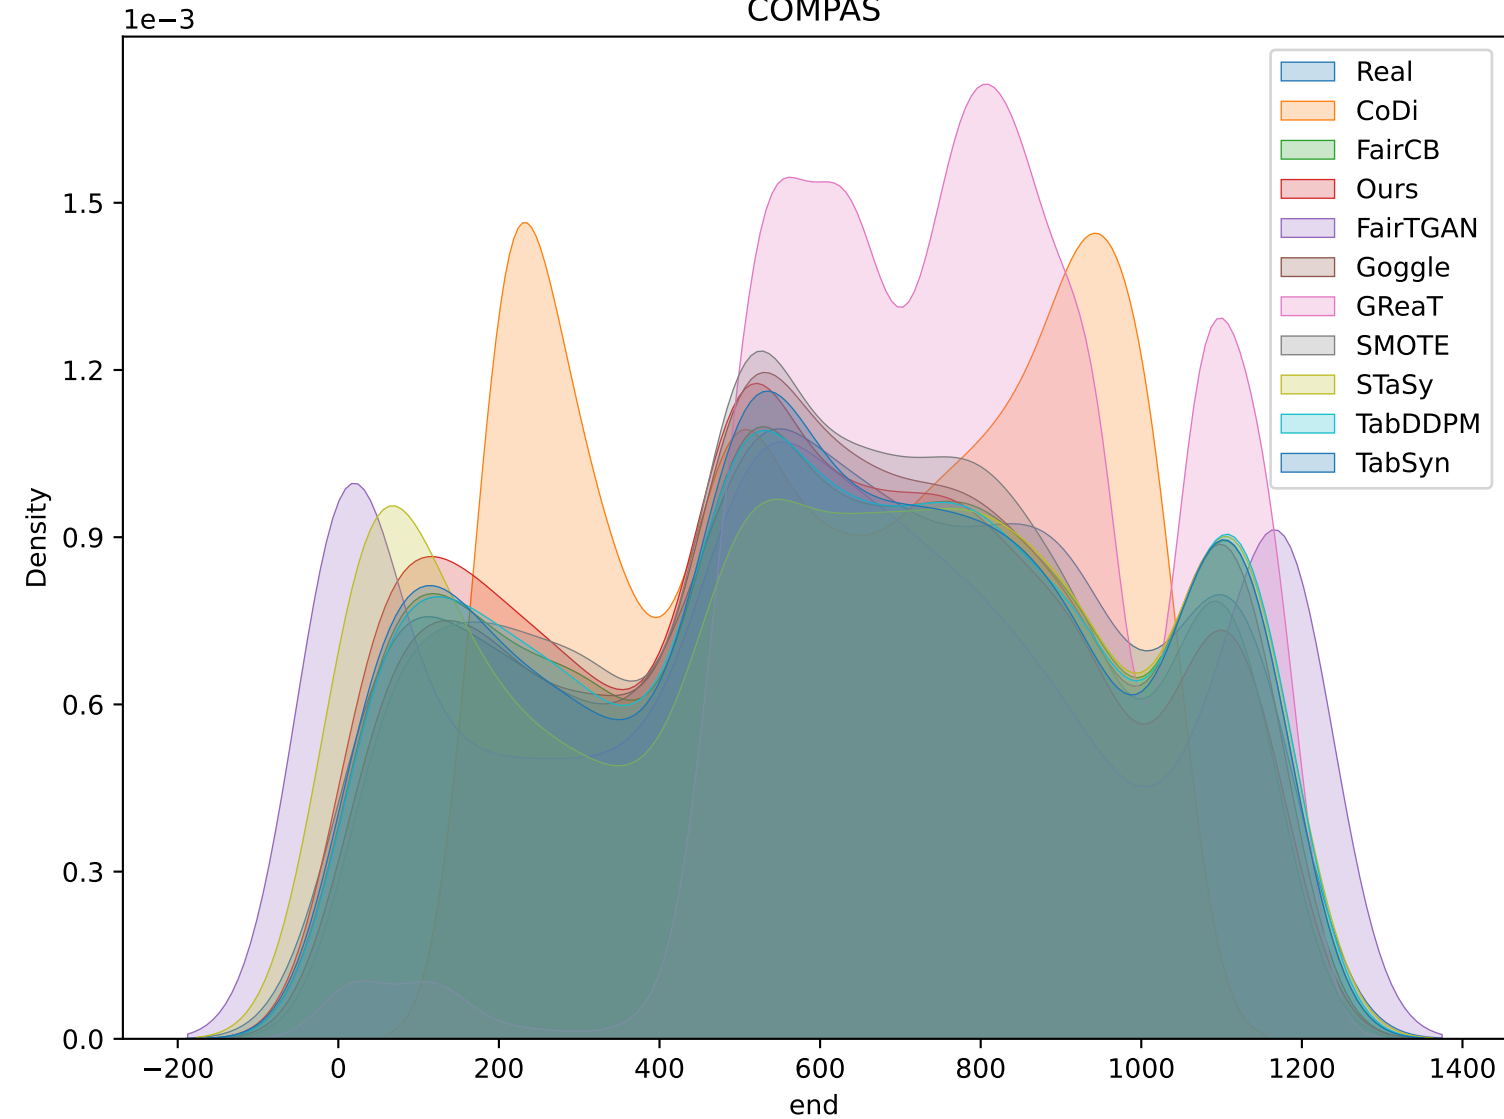

Supplement: supplementary_material [file attachment]

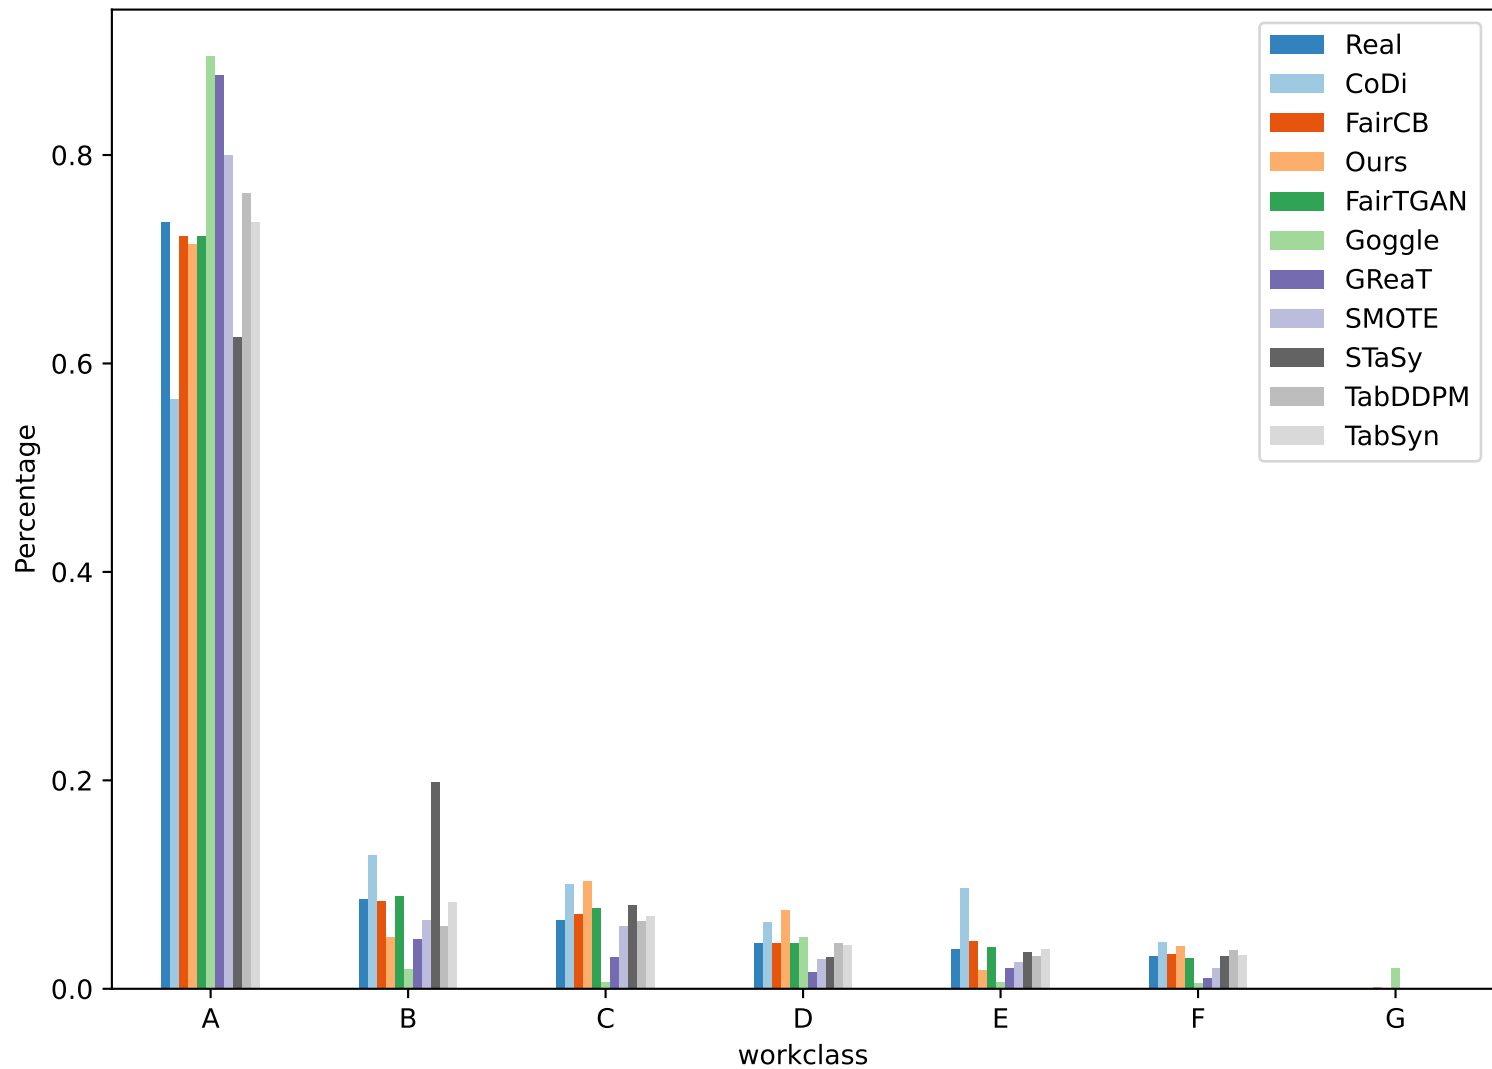

Supplement: supplementary_material [file attachment]

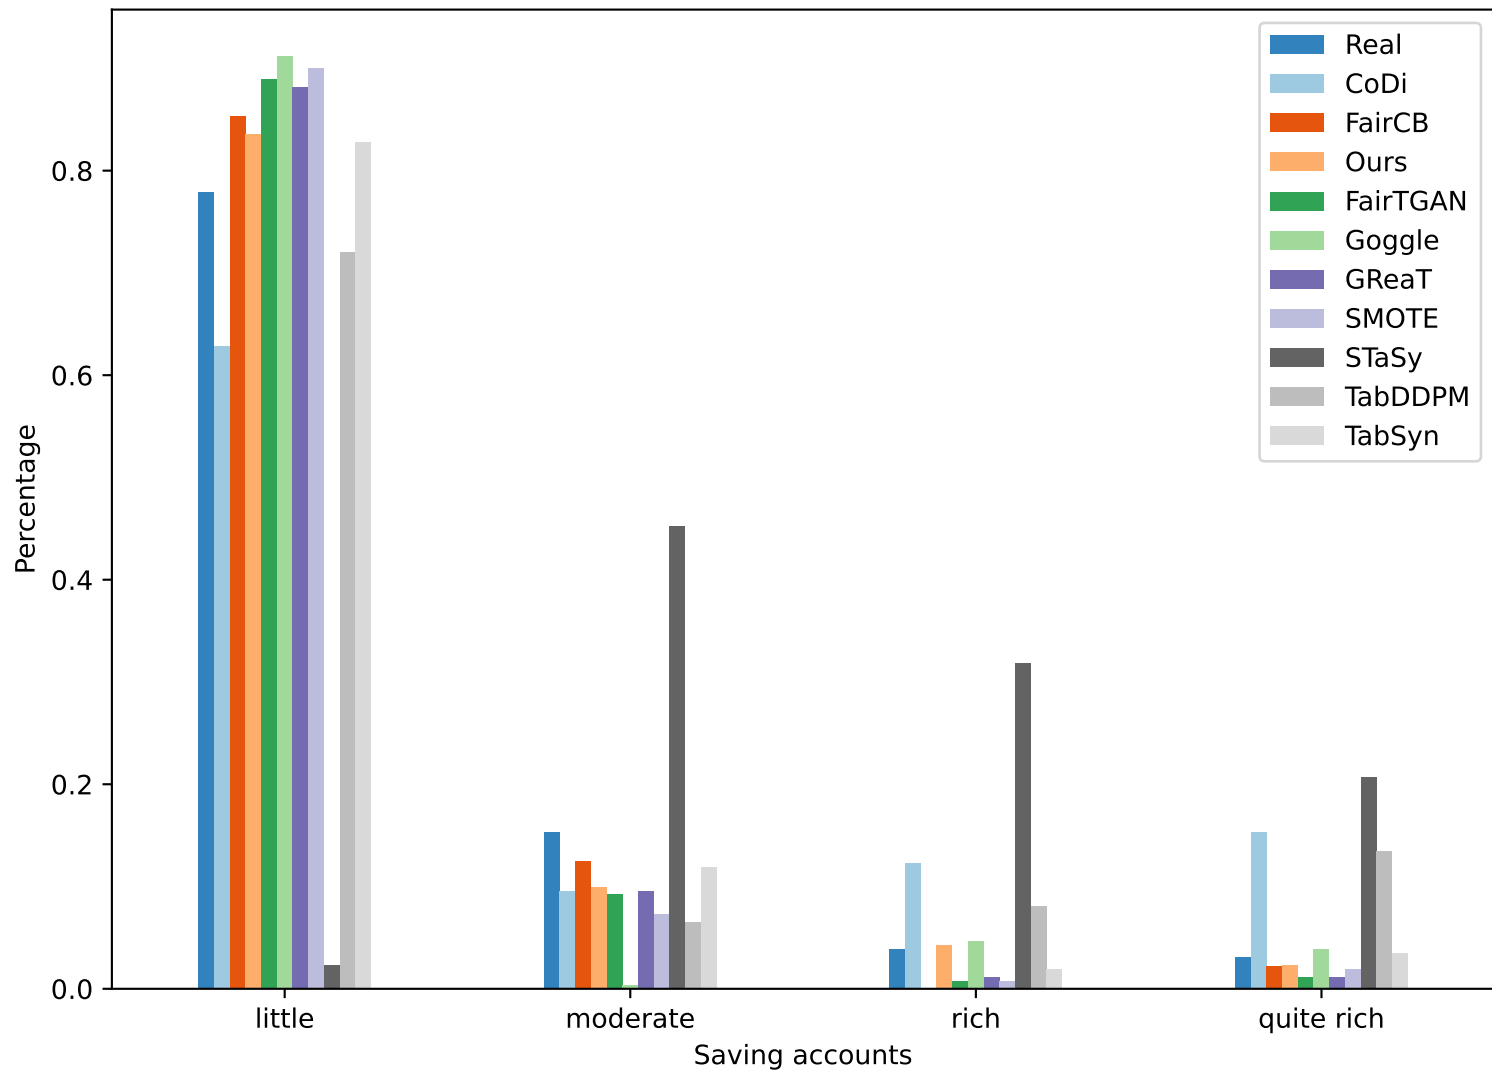

Supplement: supplementary_material [file attachment]

COMPAS

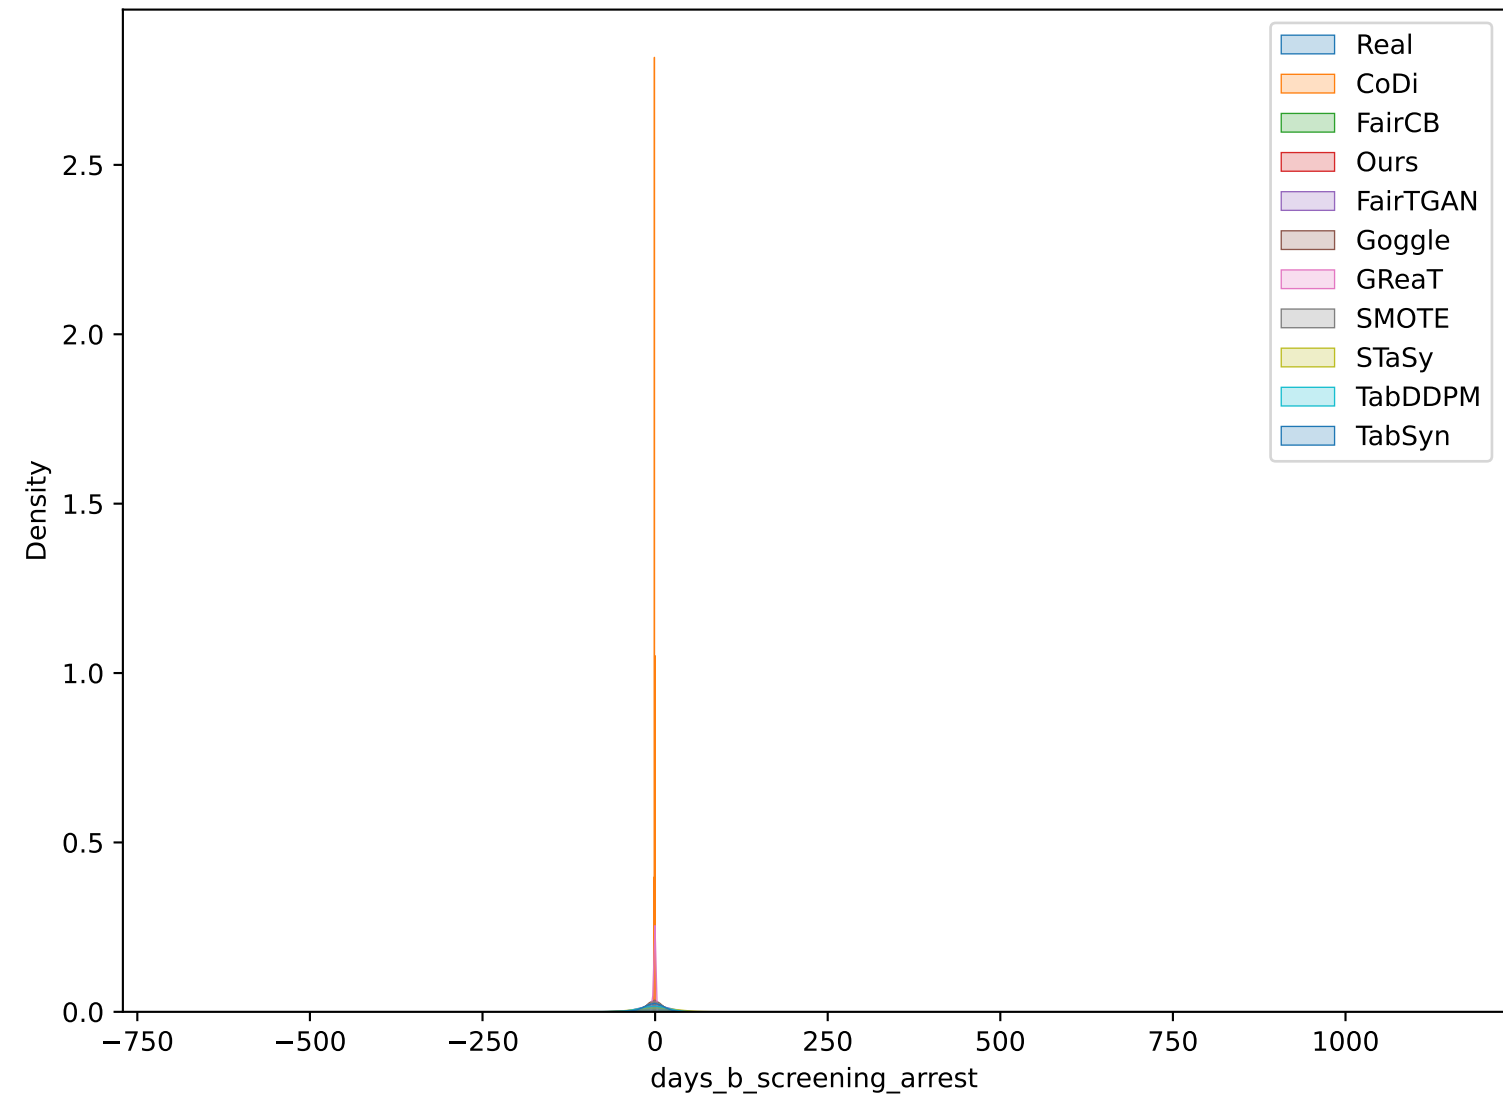

Supplement: supplementary_material [file attachment]

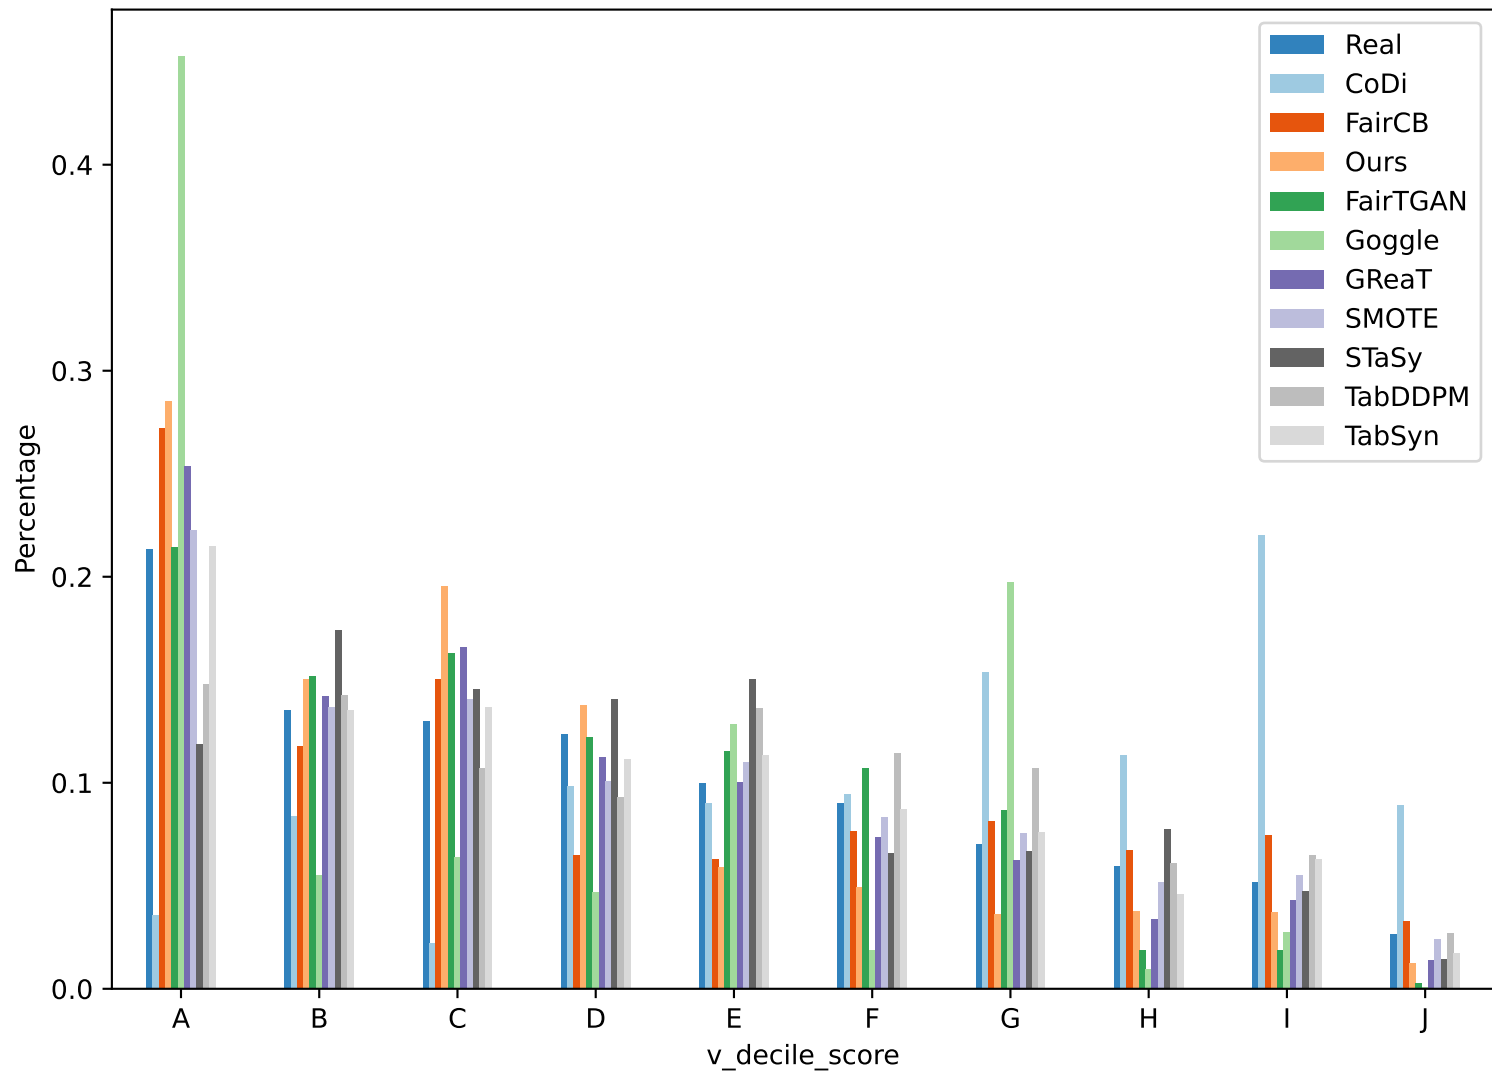

Supplement: supplementary_material [file attachment]

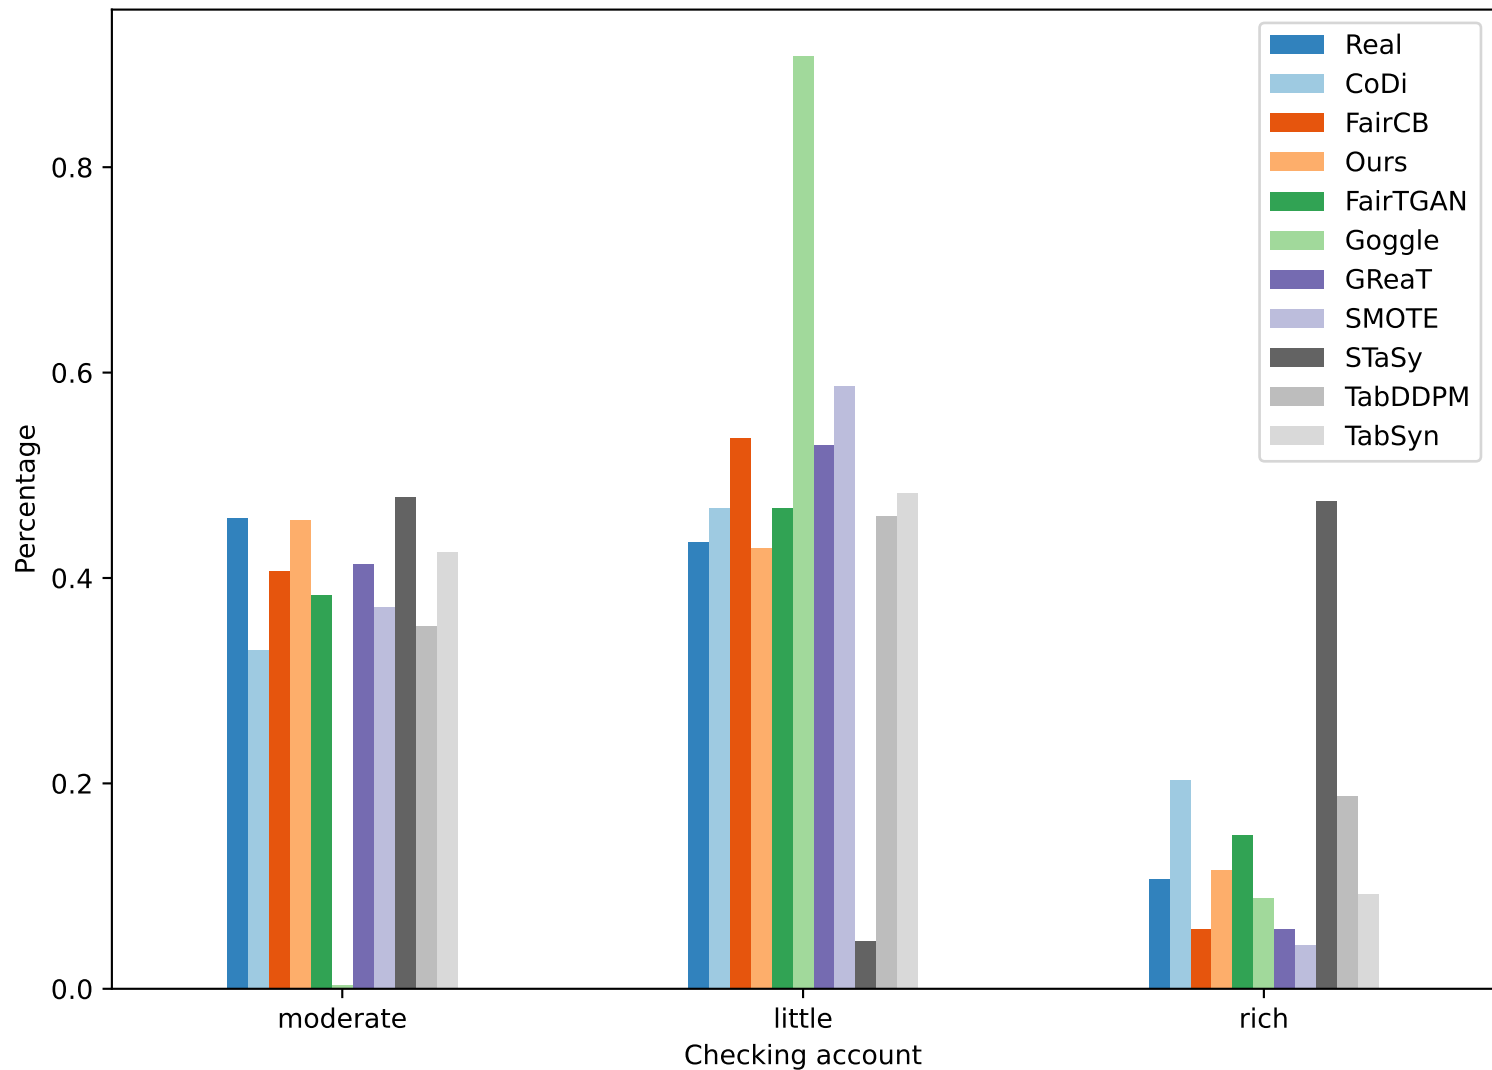

Supplement: supplementary_material [file attachment]

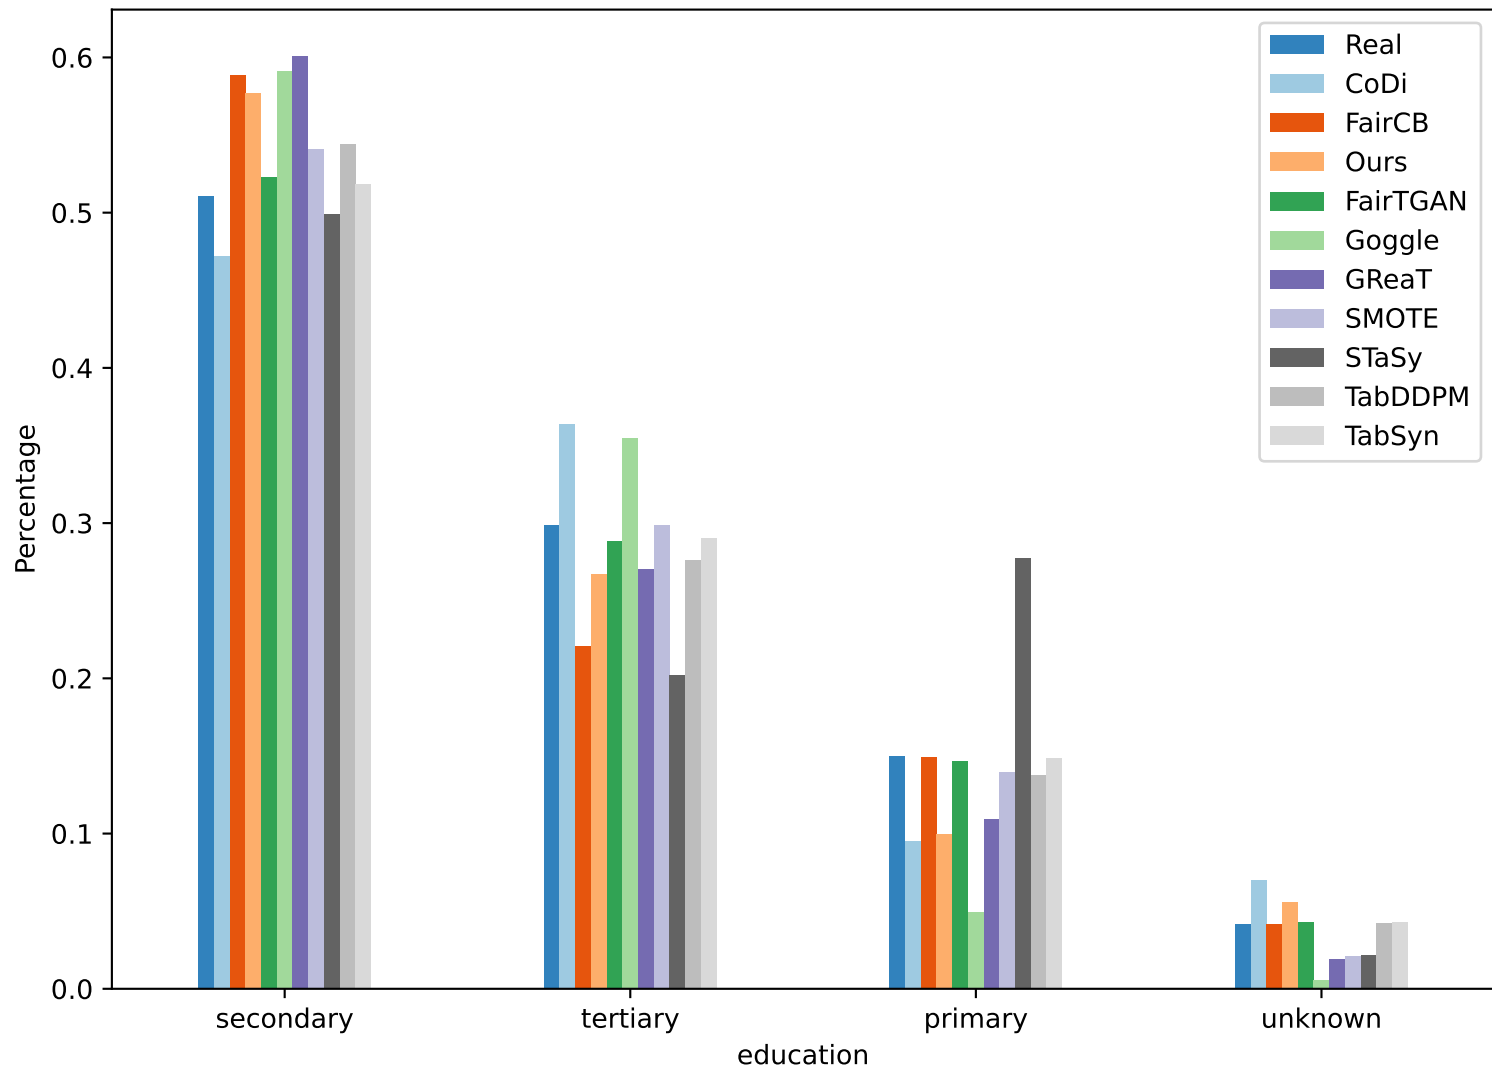

Supplement: supplementary_material [file attachment]

COMPAS

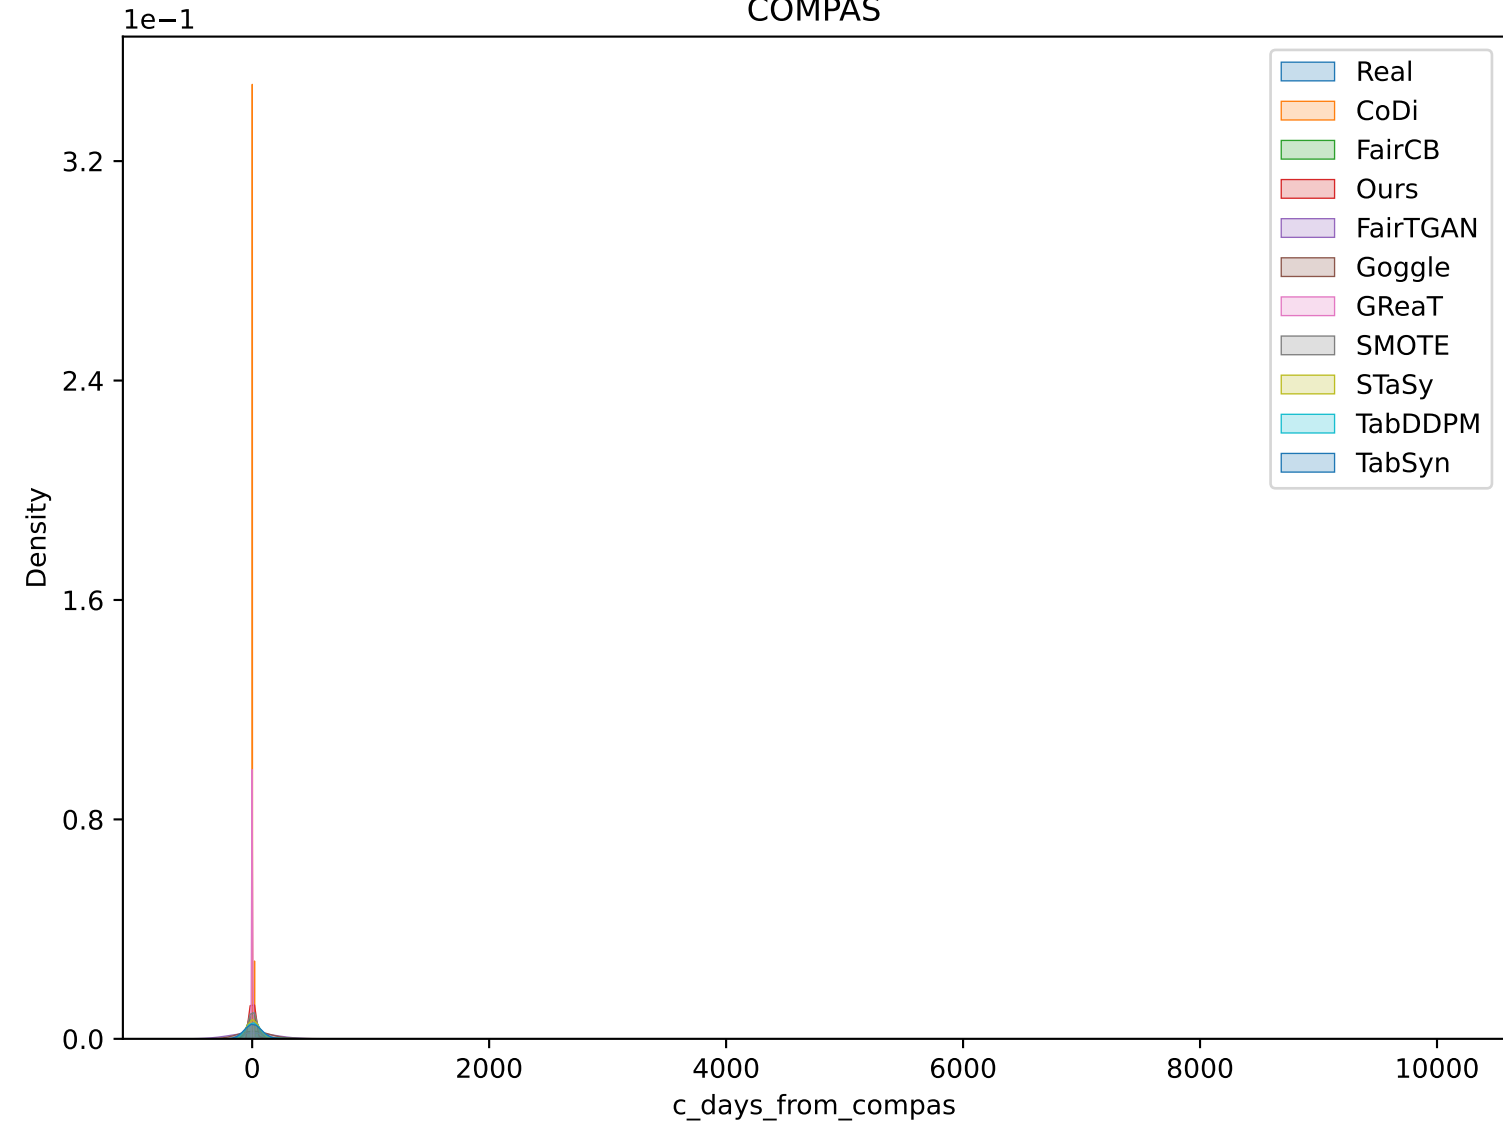

Supplement: supplementary_material [file attachment]

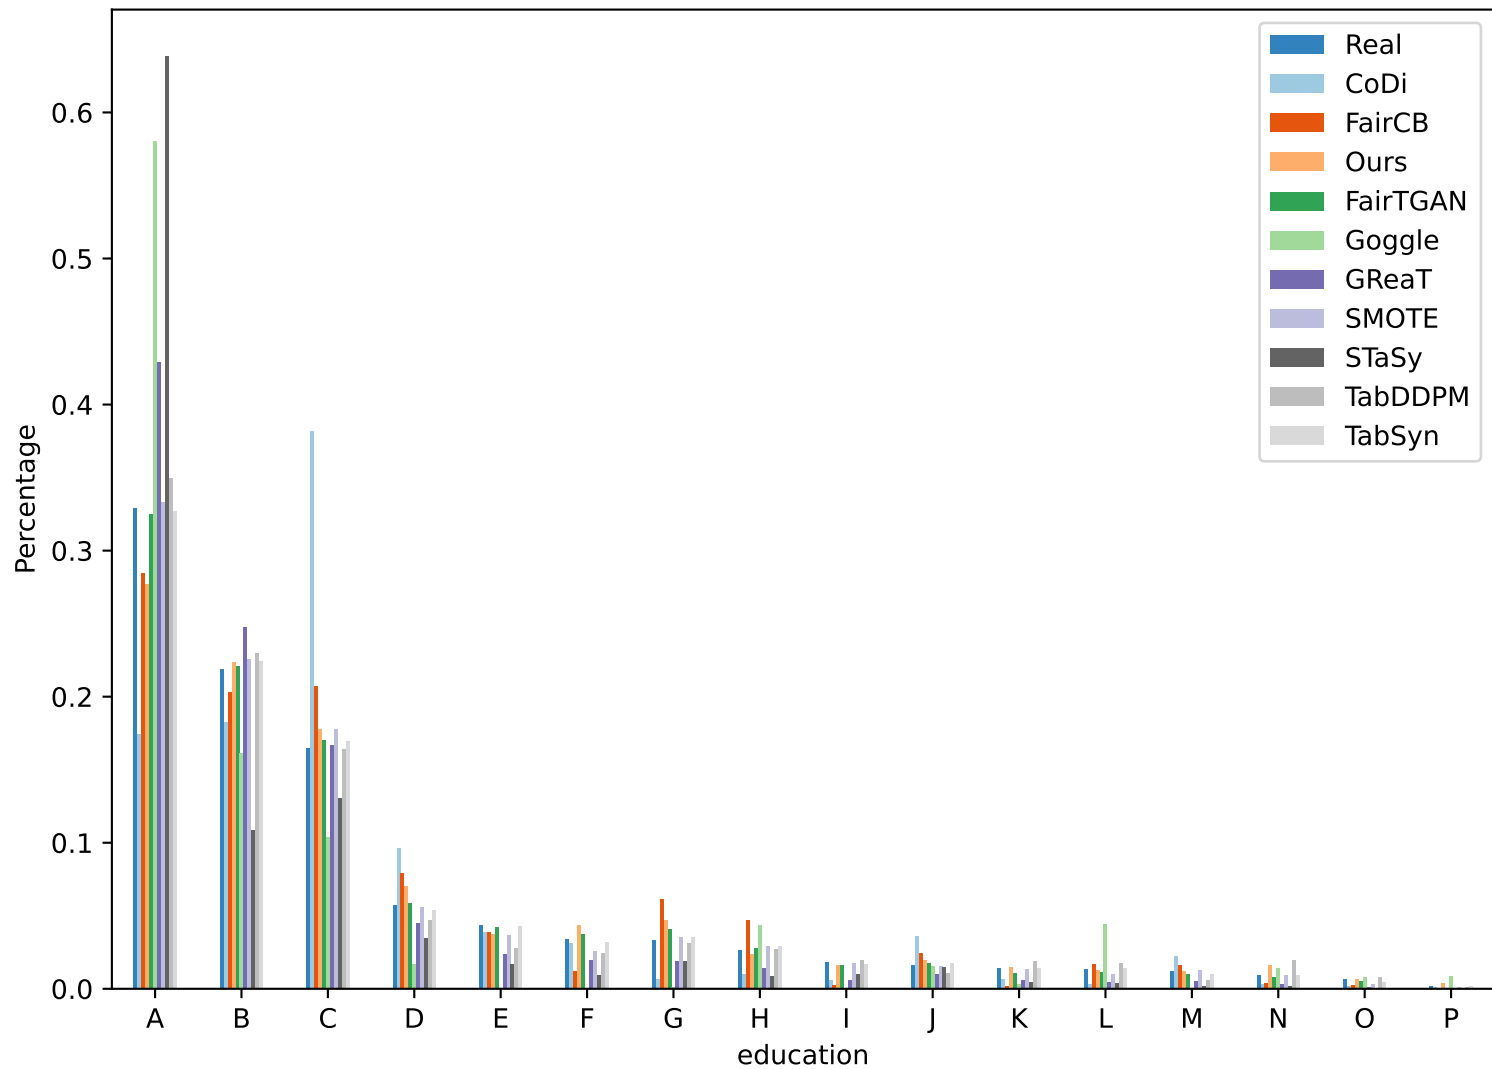

Supplement: supplementary_material [file attachment]

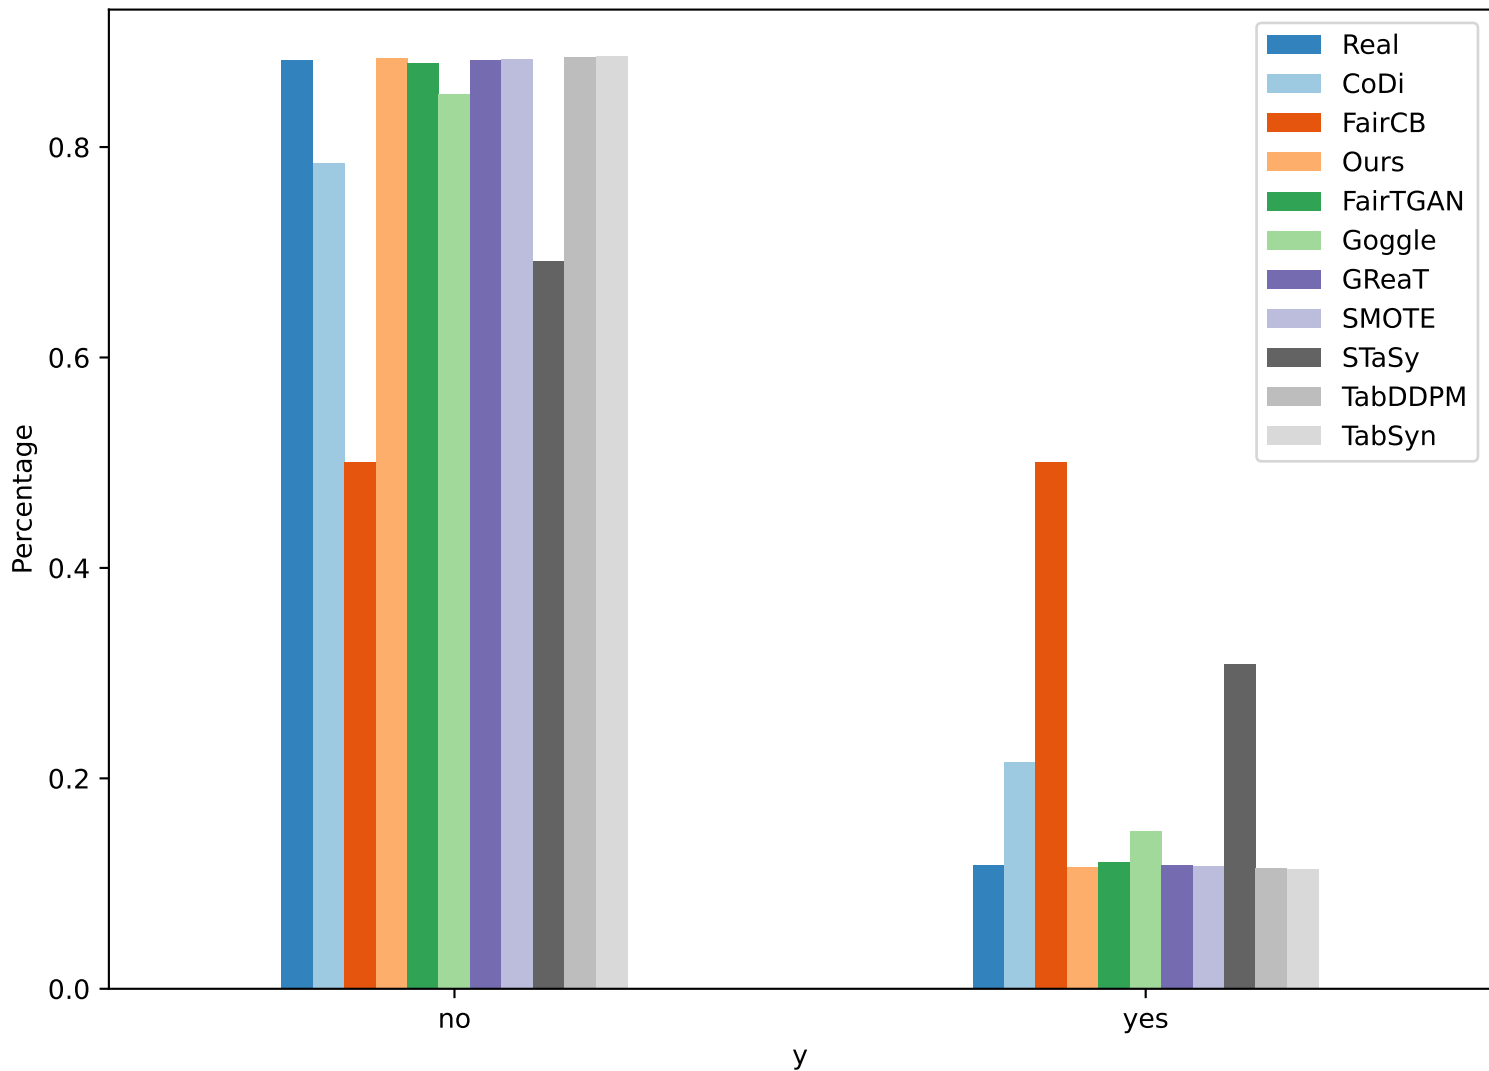

Supplement: supplementary_material [file attachment]

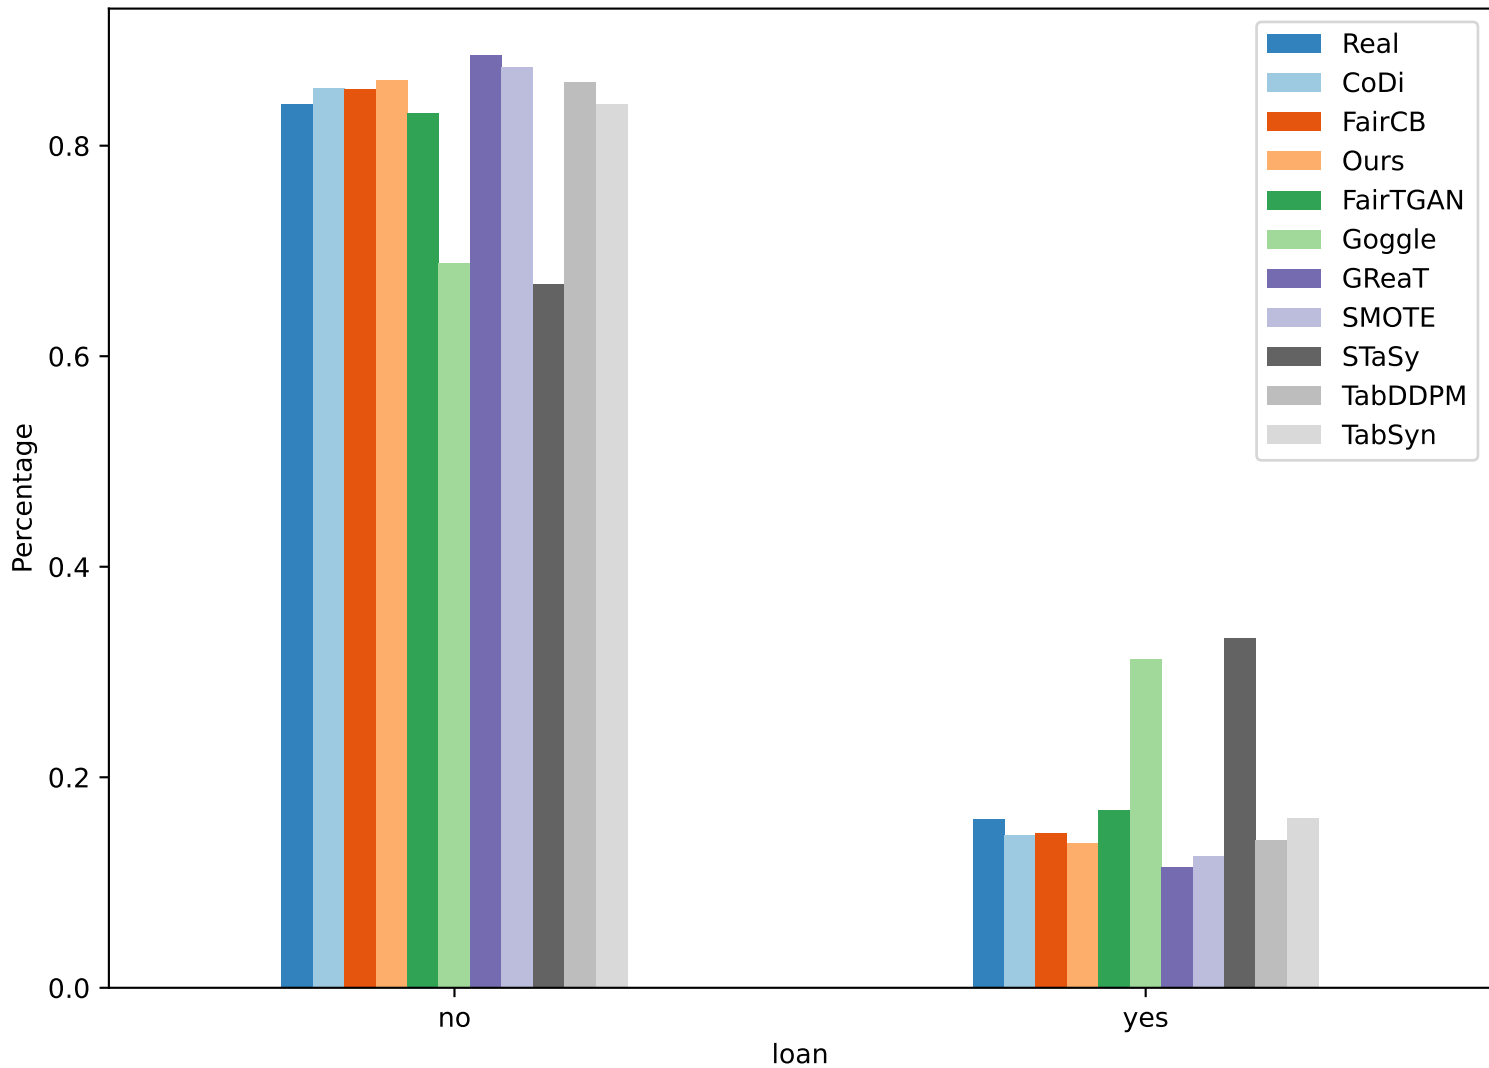

Supplement: supplementary_material [file attachment]

# (Ours) sensitive attributes vs target label on the Bank dataset

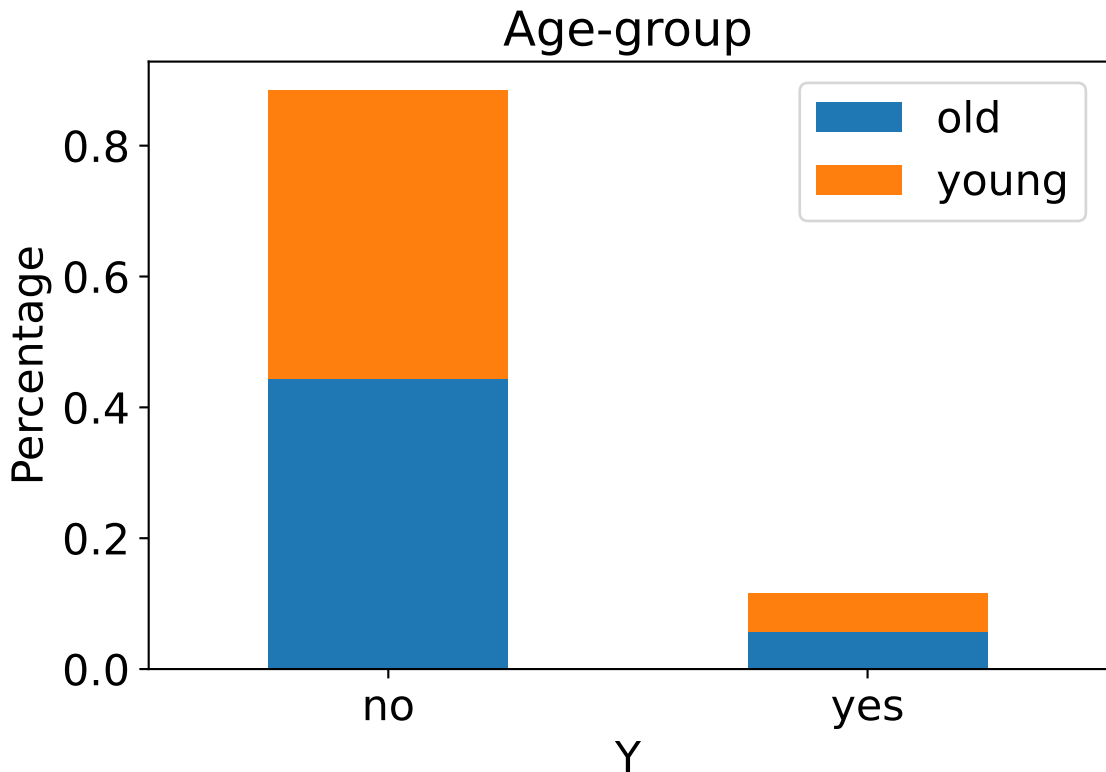

Supplement: supplementary_material [file attachment]

(Ours) sensitive attributes vs target label  
on the COMPAS dataset

Sex

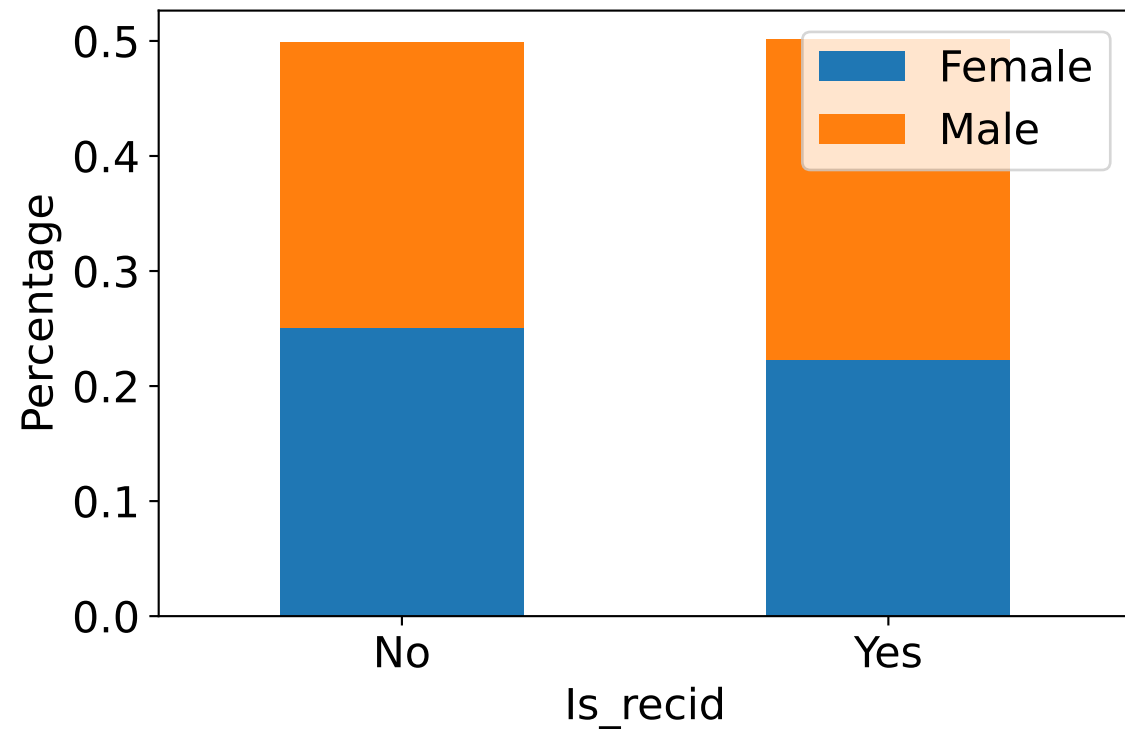

Race

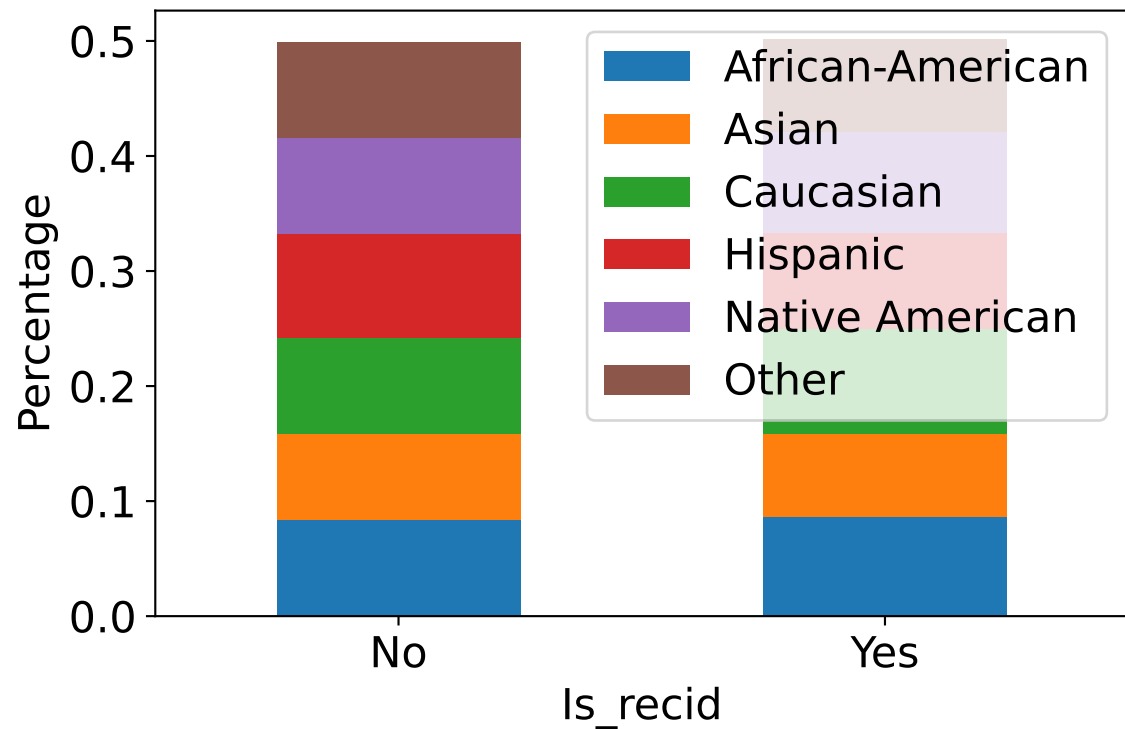

Supplement: supplementary_material [file attachment]

# (FairTGAN) sensitive attributes vs target label on the Adult dataset

## Sex

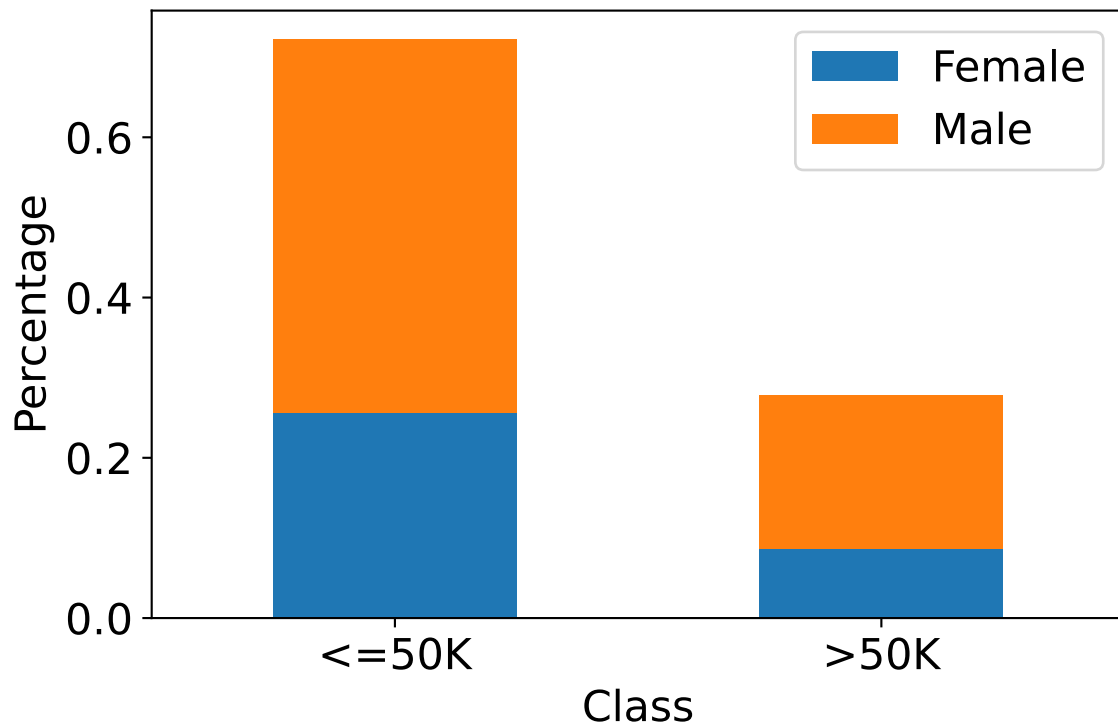

## Race

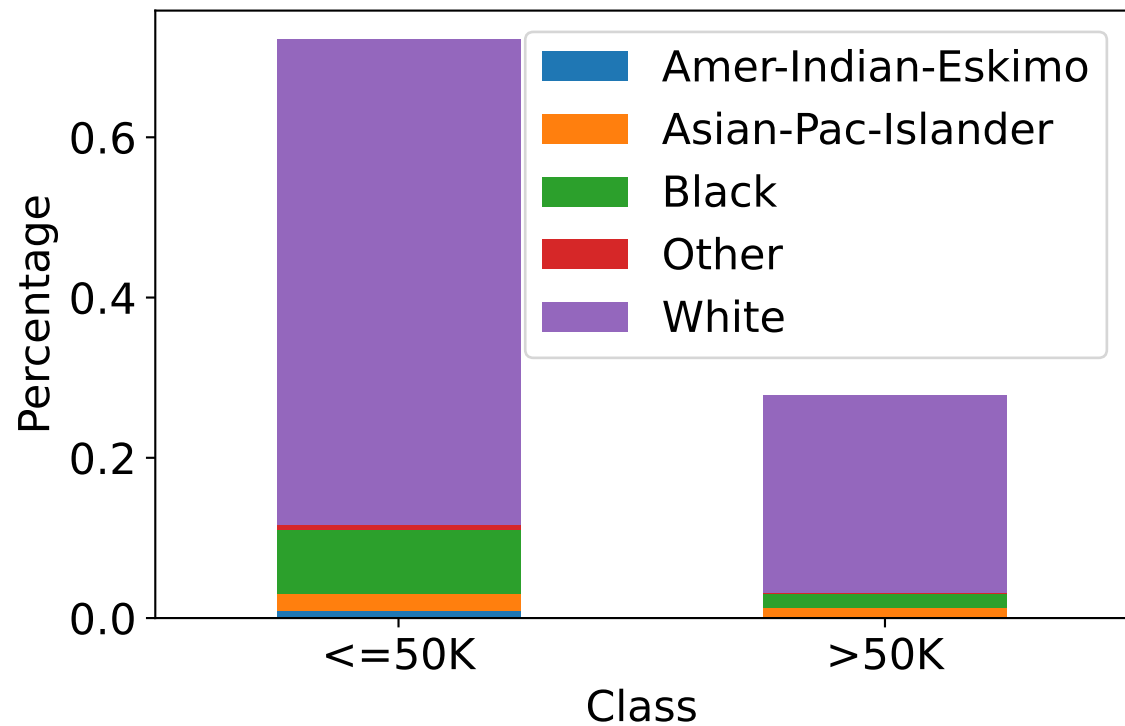

Supplement: supplementary_material [file attachment]

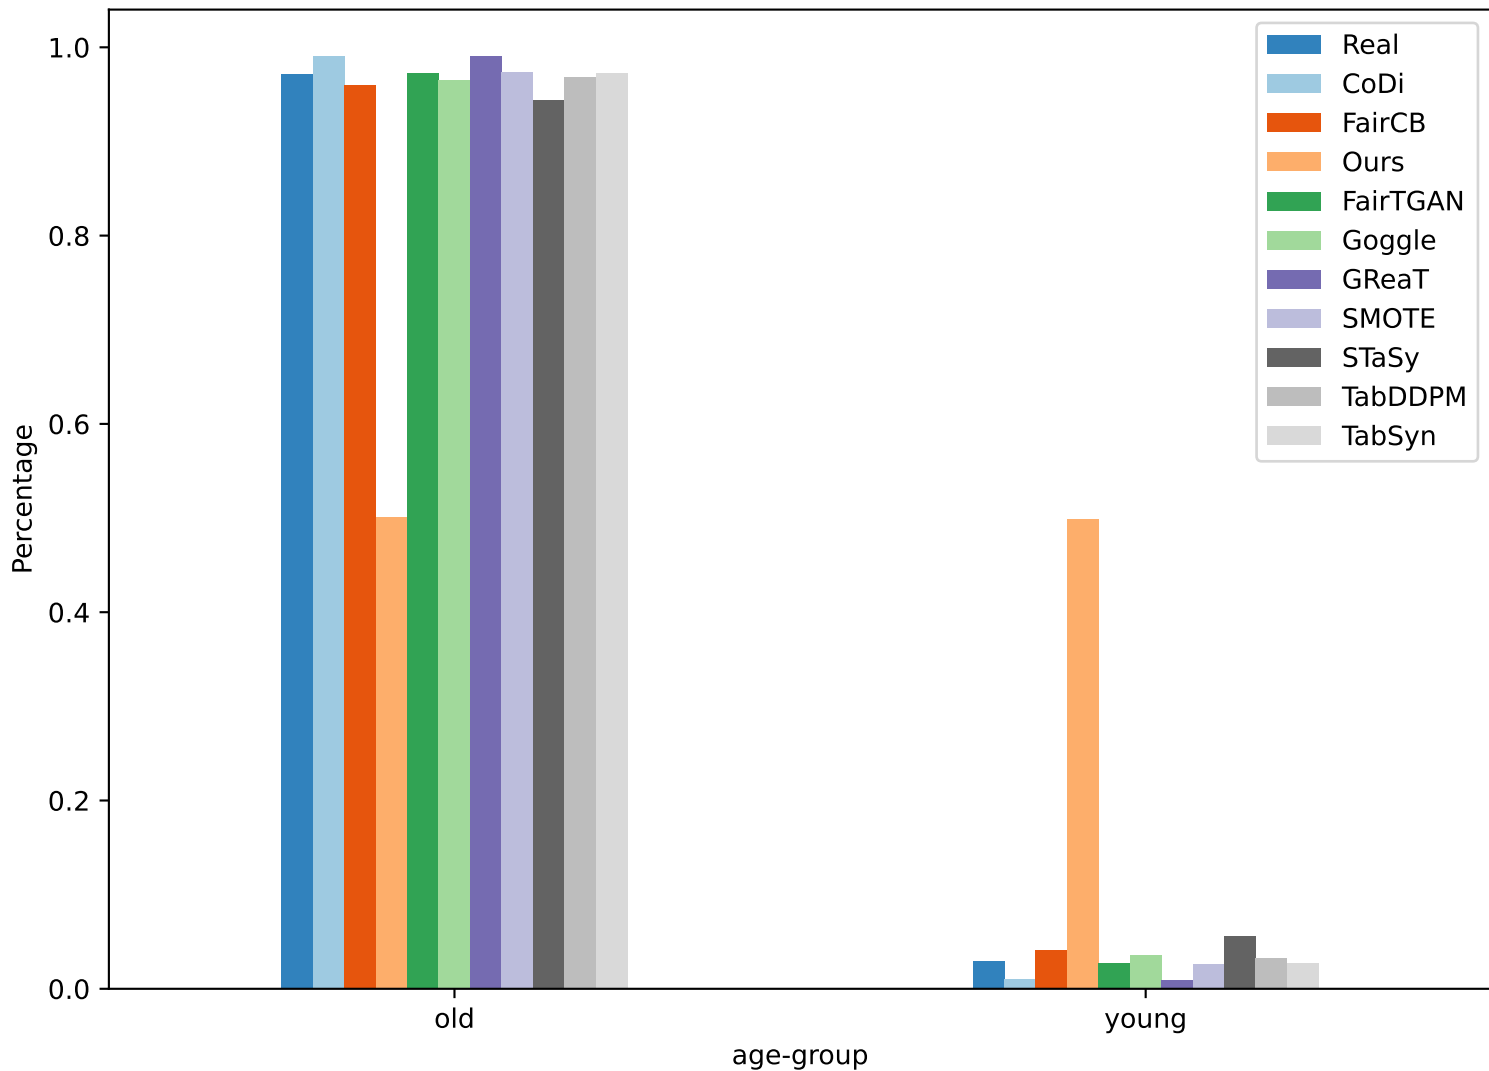

Supplement: supplementary_material [file attachment]
